# Supplementary material for: Direct N–H/α,α,β,β-C(sp3)–H functionalization of piperidineviaan azomethine ylide route: synthesis of spirooxindoles bearing 3-substituted oxindoles
Source: Royal Society of Chemistry journal article supplement (doi:10.1039/c6cc08996h), 2017-01-01

Direct N-H/ $\alpha$ ,  $\alpha$ ,  $\beta$ ,  $\beta$ -C(sp<sup>3</sup>)-H functionalization of Piperidine via an  
Azomethine Ylide Route: Synthesis of Spirooxindoles Bearing 3-  
Substituted Oxindoles

Yanlong Du, Aimin Yu, \* Jiru Jia, Youquan Zhang and Xiangtai Meng\*

*Tianjin Key Laboratory of Organic Solar Cells and Photochemical Conversion, School of Chemistry & Chemical Engineering, Tianjin University of Technology, Tianjin 300384, P. R. China. E-mail: aiminyu@tjut.edu.cn, mengxiangtai23@mail.nankai.edu.cn*

**Contents**

|                                                                     |   |
|---------------------------------------------------------------------|---|
| 1. General information and materials.....                           | 2 |
| 2. Synthesis of N-protected isatins <b>1</b> .....                  | 3 |
| 3. Synthesis of <b>3</b> .....                                      | 4 |
| 4. Optimization of the domino reaction.....                         | 6 |
| 5. Crystal structures of <b>4b</b> , <b>5f</b> and <b>7</b> .....   | 7 |
| 6. General procedure for the synthesis of <b>4</b> .....            | 8 |
| 7. NMR spectra data ( <sup>1</sup> H NMR, <sup>13</sup> C NMR)..... | 8 |

---

## 1. General information and materials

All reactions were performed under Ar atmospheres in oven-dried glassware with magnetic stirring. Unless otherwise stated, all reagents including isatins, **1w**, **3d**, 3-bromoprop-1-ene, sodium benzenesulfinate, sodium 4-methylbenzenesulfinate, sodium 4-chlorobenzenesulfinate, 1H-indene-1,2,3-trione, phenanthrene-9,10-dione and 9H-fluoren-9-one were purchased from commercial suppliers (Aldrich, TCI or Alfa Aesar) and used without further purification. All solvents were purified and dried according to standard methods prior to use. TLC monitored all reactions with silica gel-coated plates. Flash column chromatography was performed using 200-300 mesh silica gel. <sup>1</sup>H- and <sup>13</sup>C-NMR spectrum was recorded at ambient temperature on Bruker 400 instruments. All spectra were referenced to CDCl<sub>3</sub> (<sup>1</sup>H δ 7.26 ppm and <sup>13</sup>C NMR δ 77.00 ppm). HRMS were obtained on Waters Xevo Q-TOF MS with ESI resource. Melting points were measured on a RY-I apparatus and are reported uncorrected. Compound **1x** was synthesized according to literature.<sup>1</sup> Compounds **3e**<sup>2</sup>, **3f**<sup>3</sup> were synthesized according to literatures.

1. J. H. Yao, C. Chi, J. Wu and K.-P. Loh *Chem. Eur. J.*, 2009, **15**, 9299-9302.
2. F. Caturla and C. Nájera, *Tetrahedron*, 1996, **52**, 15243-15256.
3. T. Llamas, R. Gómez, Arrayás and J. C. Carretero, *Org. Lett.*, 2006, **8**, 1795-1798.

## 2. Synthesis of N-protected isatins **1**

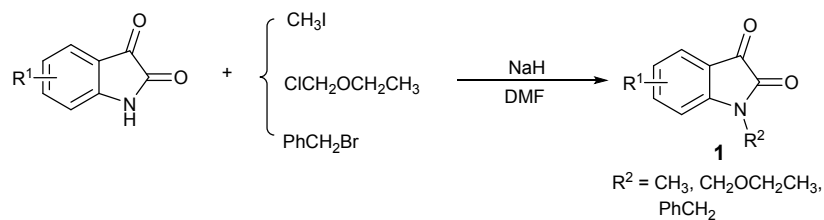

Under Ar atmosphere, to a solution of isatin (10 mmol, 1.0 eq) in DMF 45 ml was added NaH (12 mmol, 1.2 eq.) in portions at 0 °C. After stirring for 5 min, MeI (12 mmol, 1.2 eq.), ClCH<sub>2</sub>OCH<sub>2</sub>CH<sub>3</sub> (12 mmol, 1.2 eq.) or BnBr (12 mmol, 1.2 eq.) was added to the above mixture slowly. After warming to room temperature, the reaction mixture was stirred for 12-20 h. The reaction was then quenched by water and extracted with EtOAc. The organic layer was separated and washed with water, then the ethyl acetate layer was dried over MgSO<sub>4</sub>, filtered and concentrated in vacuum. The crude product was purified by chromatography (SiO<sub>2</sub>, ethyl acetate : petroleum ether = 1:2). The spectral data consist with the data reported in the literatures.

| Entry | R <sup>1</sup>                                 | R <sup>2</sup>      | Time (h) | Yield (%) |
|-------|------------------------------------------------|---------------------|----------|-----------|
| 1     | 5-CH <sub>3</sub> ( <b>1a</b> ) <sup>4</sup>   | CH <sub>3</sub>     | 16       | 82        |
| 2     | H ( <b>1b</b> ) <sup>4</sup>                   | CH <sub>3</sub>     | 16       | 89        |
| 3     | 5-CH <sub>3</sub> O ( <b>1c</b> ) <sup>4</sup> | CH <sub>3</sub>     | 12       | 98        |
| 4     | 5-t-Bu ( <b>1d</b> ) <sup>5</sup>              | CH <sub>3</sub>     | 16       | 90        |
| 5     | 5-F ( <b>1e</b> ) <sup>4</sup>                 | CH <sub>3</sub>     | 20       | 69        |
| 6     | 5-Cl ( <b>1f</b> )                             | CH <sub>3</sub>     | 16       | 78        |
| 7     | 5-Br ( <b>1g</b> ) <sup>6</sup>                | CH <sub>3</sub>     | 16       | 75        |
| 8     | 5-OCF <sub>3</sub> ( <b>1h</b> ) <sup>7</sup>  | CH <sub>3</sub>     | 16       | 58        |
| 9     | 5-NO <sub>2</sub> ( <b>1i</b> ) <sup>6</sup>   | CH <sub>3</sub>     | 16       | 46        |
| 10    | 5,6-F <sub>2</sub> ( <b>1j</b> )               | CH <sub>3</sub>     | 12       | 64        |
| 11    | 6-Br ( <b>1k</b> ) <sup>8</sup>                | CH <sub>3</sub>     | 16       | 77        |
| 12    | 7-CH <sub>3</sub> ( <b>1l</b> ) <sup>4</sup>   | CH <sub>3</sub>     | 12       | 86        |
| 13    | 7-Cl ( <b>1m</b> ) <sup>9</sup>                | CH <sub>3</sub>     | 16       | 76        |
| 14    | 7-Br ( <b>1n</b> ) <sup>10</sup>               | CH <sub>3</sub>     | 16       | 70        |
| 15    | 4-Br ( <b>1o</b> ) <sup>8</sup>                | CH <sub>3</sub>     | 16       | 66        |
| 16    | H ( <b>1p</b> )                                | CH <sub>2</sub> OEt | 12       | 80        |
| 17    | 5-CH <sub>3</sub> ( <b>1q</b> )                | CH <sub>2</sub> OEt | 12       | 83        |
| 18    | 5-Br ( <b>1r</b> )                             | CH <sub>2</sub> OEt | 12       | 67        |
| 19    | H ( <b>1s</b> ) <sup>4</sup>                   | CH <sub>2</sub> Ph  | 12       | 88        |
| 20    | 5-CH <sub>3</sub> ( <b>1t</b> ) <sup>11</sup>  | CH <sub>2</sub> Ph  | 12       | 86        |
| 21    | 5-Cl ( <b>1u</b> ) <sup>11</sup>               | CH <sub>2</sub> Ph  | 12       | 90        |
| 22    | 5-Br ( <b>1v</b> ) <sup>12</sup>               | CH <sub>2</sub> Ph  | 12       | 71        |

The spectral data of known N-methyl isatins as below:

4. B.-X. Tang, R.-J. Song, C.-Y. Wu, Y. Liu, M.-B. Zhou, W.-T. Wei, G.-B. Deng, D.-L. Yin, and J.-H. Li, *J. Am. Chem. Soc.*, 2010, **132**, 8900-8902.

5. W. Li, Z. Duan, X. Zhang, H. Zhang, M. Wang, R. Jiang, H. Zeng, C. Liu and A. Lei, *Angew. Chem. Int. Ed.*, 2015, **54**, 1893-1896.
6. A. Beauchard, Y. Ferandin, S. Frère, O. Lozach, M. Blairvacq, L. Meijer, V. Thiéry and T. Besson, *Bioorg. Med. Chem.*, 2006, **14**, 6434-6443.
7. A. D. Mamuye, S. Monticelli, L. Castoldi, W. Holzer and V. Pace, *Green Chem.*, 2015, **17**, 4194-4197
8. Y. Wang, W. Li, X. Cheng, Z. Zhan, X. Ma, L. Guo, H. Jin and Y. Wu, *Tetrahedron*, 2016, **72**, 3193-3197.
9. Q. Gui, F. Dai, J. Liu, P. Chen, Z. Yang, X. Chen and Z. Tan, *Org. Biomol. Chem.*, 2014, **12**, 3349-3353
10. K. Engen, J. Sävmarker, U. Rosenström, J. Wannberg, T. Lundbäck, A. Jenmalm-Jensen and M. Larhed, *Org. Process Res. Dev.*, 2014, **18**, 1582-1588.
11. G. Satish, A. Polu, T. Ramar and A. Ilangoan, *J. Org. Chem.*, 2015, **80**, 5167-5175.
12. K. Aikawa, S. Mimura, Y. Numata and K. Mikami, *Eur. J. Org. Chem.*, 2011, 62-65

### 3. Synthesis of 3

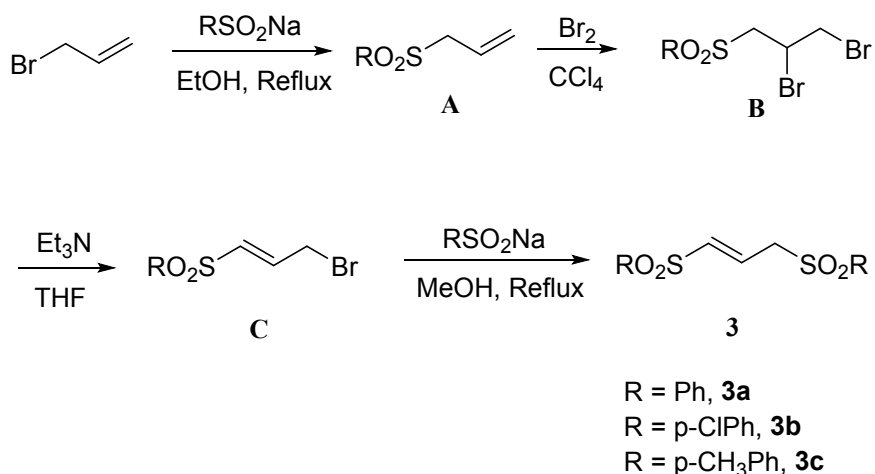

| Entry | R                                               | A   | B   | C   | 3               |
|-------|-------------------------------------------------|-----|-----|-----|-----------------|
| 1     | Ph                                              | 89% | 85% | 65% | <b>3a</b> , 87% |
| 2     | p-ClC <sub>6</sub> H <sub>4</sub>               | 75% | 80% | 62% | <b>3b</b> , 94% |
| 3     | p-CH <sub>3</sub> C <sub>6</sub> H <sub>4</sub> | 88% | 89% | 90% | <b>3c</b> , 84% |

#### 3a as an example

Under Ar atmosphere, to a well stirred ethanol (60 mL) solution of sodium benzenesulfinate (10.00 g, 82.60 mmol) was added 3-bromoprop-1-ene (13.57 g, 82.66 mmol). The reaction mixture was refluxed for 4 h. After cooling to room temperature, the reaction mixture was filtrated and removed the white solid. The filtrate was concentrated under vacuum and the crude product **A** (13.4 g, 89%) was taken for the next reaction.

To a well stirred CCl<sub>4</sub> (26 mL) solution of **A** (13 g, 71.34 mmol) was added a CCl<sub>4</sub> (10 mL) solution of Br<sub>2</sub> (11.96 g, 74.90 mmol) dropwise. After completion of the reaction (monitored by TLC), the reaction was quenched by addition of saturated aqueous NaHSO<sub>3</sub> solution and extracted by CH<sub>2</sub>Cl<sub>2</sub> (50

---

mL  $\times$  3). The organic layer was separated and dried over anhydrous Na<sub>2</sub>SO<sub>4</sub>. The organic layer was concentrated under vacuum, and the crude product **B** (20.82 g, 85%) was taken for the next reaction.

To a THF (55 mL) solution of **B** (20 g, 58.47 mmol) was added Et<sub>3</sub>N (6.21 g, 61.39 mmol) dropwise at 0 °C, and the reaction mixture was stirred under the same temperature for 1 h. After completion of the reaction (monitored by TLC), the reaction was acidified by addition of HCl (1M) and extracted by CH<sub>2</sub>Cl<sub>2</sub> (50 mL  $\times$  3). The combined organic extract was dried over anhydrous Na<sub>2</sub>SO<sub>4</sub> and the solvent was removed under reduced pressure. The crude product was recrystallized (ethanol) to afford the pure product **C** (10.34 g, 65%).

To a CH<sub>3</sub>OH (25 mL) solution of **C** (5.00 g, 19.15 mmol) was added sodium benzenesulfinate (6.29 g, 38.30 mmol), and the reaction mixture was refluxed for 3 h. After completion of the reaction (monitored by TLC), the reaction was quenched by addition of 30 mL saturated aqueous ammonium chloride solution. The organic layer was extracted with CH<sub>2</sub>Cl<sub>2</sub> (30 mL $\times$ 3), and then washed with a saturated aqueous sodium bicarbonate solution. The combined organic layer was dried over anhydrous Na<sub>2</sub>SO<sub>4</sub> and the solvent was removed under reduced pressure. The crude product (**3a**, 5.4 g, 87%) was used in the next step without further purification. The spectral data (**3a**, **3b**) consist with the data reported in the literatures.<sup>13</sup>

13. (a) P. R. Joshi, S. Undeela, D. D. Reddy, K. K. Singarapu and R. S. Menon, *Org. Lett.*, 2015, **17**, 1449-1452. (b) C. Nájera, A. Pérez-Pinar and J. M. Sansano, *Tetrahedron*, 1991, **47**, 6337-6352.

#### 4. Optimization of the domino reaction

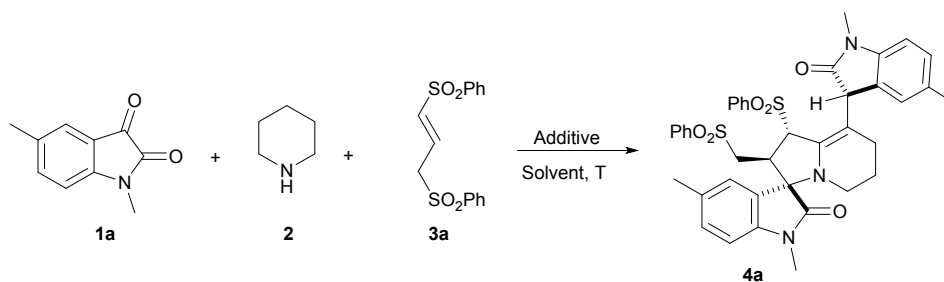

| Entry | Ratio     | Additive     | Solvent | T (°C) | Yield (%) |
|-------|-----------|--------------|---------|--------|-----------|
| 1     | 1.2:1.2:1 | 4-TFBA (0.1) | toluene | 110    | 42        |
| 2     | 1.2:1.2:1 | 4-TFBA (0.3) | toluene | 110    | 51        |
| 3     | 1.2:1.2:1 | 4-TFBA (0.5) | toluene | 110    | 54        |
| 4     | 1.2:1.2:1 | 4-TFBA (0.7) | toluene | 110    | 50        |
| 5     | 1.2:1.2:1 | 4-TFBA (1.2) | toluene | 110    | 68        |
| 6     | 1.2:1.2:1 | 4-TFBA       | toluene | 90     | 40        |
| 7     | 1.2:1.2:1 | 4-TFBA       | toluene | 70     | trace     |
| 8     | 1.2:1.2:1 | 4-TFBA       | toluene | 50     | trace     |
| 9     | 1.4:1.2:1 | 4-TFBA       | toluene | 110    | 70        |
| 10    | 1.6:1.2:1 | 4-TFBA       | toluene | 110    | 64        |
| 11    | 1.8:1.2:1 | 4-TFBA       | toluene | 110    | 62        |
| 12    | 2.4:1.2:1 | 4-TFBA       | toluene | 110    | 66        |

---

## 5. Crystal structures of 4b, 5f and 7

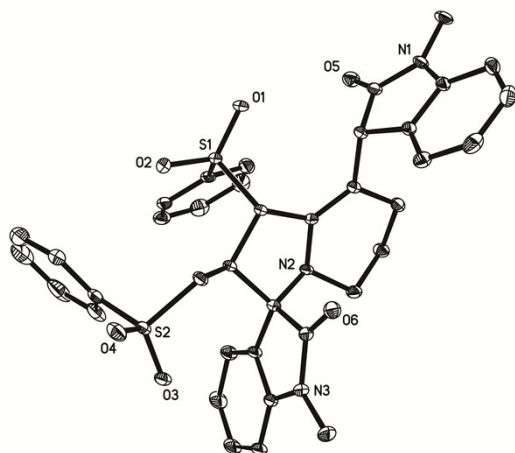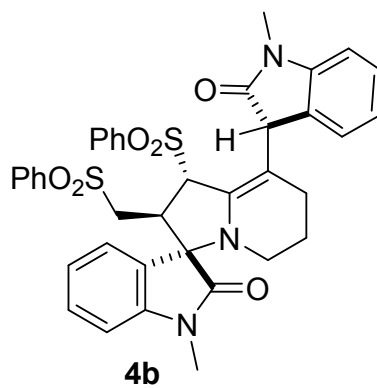

Crystal structure of **4b**

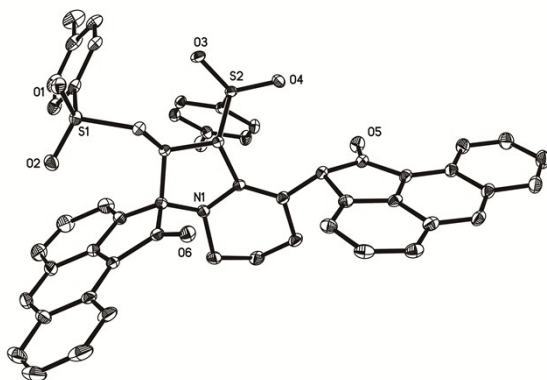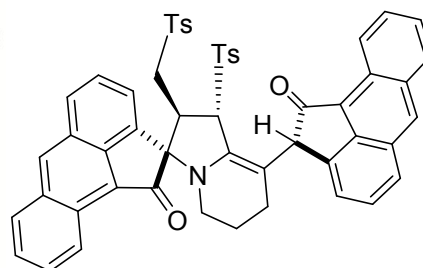

Crystal structure of **5f**

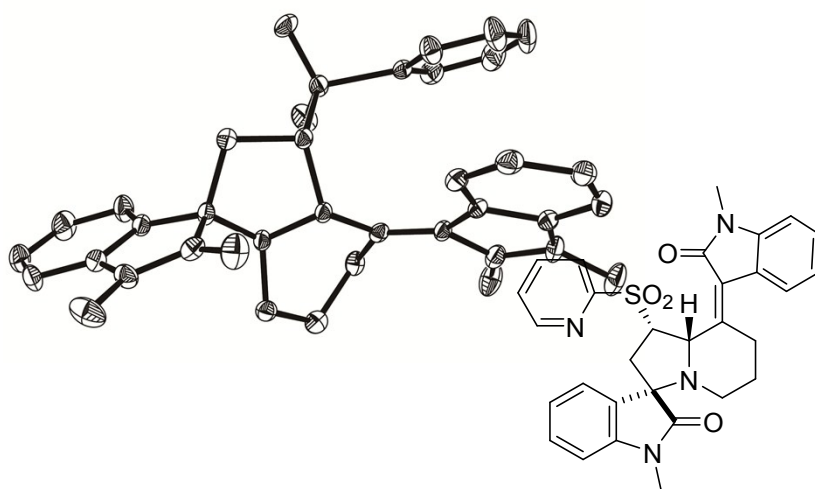

Crystal structure of **7**

## 6. General procedure for the synthesis of **4**

### **4a** as an example

To a stirred solution of **3a** (100 mg, 0.31 mmol) in toluene (2 mL), 4-(trifluoromethyl)benzoic acid (59 mg, 0.31 mmol), piperidine (32 mg, 0.37 mmol), and **1a** (65 mg, 0.37 mmol) were added under argon atmosphere, and the reaction mixture was stirred for 1 h at 110 °C. After the reaction complete (monitored by TLC), the reaction was quenched by the addition of water (5 mL), extracted by CH<sub>2</sub>Cl<sub>2</sub> (10 mL×3). Combined the organic phase and washed with saturated NaHCO<sub>3</sub> solution (10 mL×3), and dried with Na<sub>2</sub>SO<sub>4</sub>. The solvent was evaporated and the residue was purified by silica-gel column chromatography (ethyl acetate : petroleum ether = 1:1) to give **4a** (93 mg, 70%) as colorless solid.

## 7. NMR spectra data

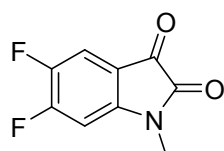

**5,6-difluoro-1-methylindoline-2,3-dione (1j)**: 64%, red solid; *R<sub>f</sub>* (ethyl acetate : petroleum ether = 1:2) = 0.60; m.p. 138-139 °C; IR(KBr): 3063, 1738, 1627, 1615, 1498, 1474, 1434, 1388 1247, 1104 cm<sup>-1</sup>; <sup>1</sup>H NMR (400 MHz, Chloroform-*d*) δ = 7.47 (t, *J* = 7.8 Hz, 1H), 6.75 (dd, *J* = 9.2, 5.6 Hz, 1H), 3.24 (s, 3H) ppm; <sup>13</sup>C NMR (100 MHz, CDCl<sub>3</sub>) δ = 180.88, 157.75, 156.93 (dd, *J* = 260.7, 14.2 Hz), 149.08 (dd, *J* = 10.0, 1.6 Hz), 147.30 (dd, *J* = 246.2, 13.6 Hz), 114.72 (dd, *J* = 19.3, 2.9 Hz), 112.65 (t, *J* = 4.5 Hz), 100.59 (d, *J* = 23.3 Hz), 26.41 ppm; ESI-HRMS: calcd. For C<sub>9</sub>H<sub>5</sub>F<sub>2</sub>NO<sub>2</sub>+H 198.0367, found 198.0371.



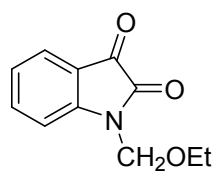

**1-(ethoxymethyl)indoline-2,3-dione (1p):** 80%, yellow solid;  $R_f$  (ethyl acetate : petroleum ether = 1:2) = 0.50; m.p. 81-82 °C; IR(KBr): 2975, 1741, 1727, 1605, 1470, 1343, 1287, 1222, 1191, 1095, 1077  $\text{cm}^{-1}$ ;  $^1\text{H}$  NMR (400 MHz, Chloroform-*d*)  $\delta$  = 7.52 – 7.77 (m, 2H), 7.02 – 7.21 (m, 2H), 5.18 (s, 2H), 3.56 (q,  $J$  = 7.0 Hz, 2H), 1.18 (t,  $J$  = 7.0 Hz, 3H) ppm;  $^{13}\text{C}$  NMR (100 MHz,  $\text{CDCl}_3$ )  $\delta$  = 182.91, 158.22, 150.22, 138.53, 125.30, 124.16, 117.46, 111.59, 70.08, 64.63, 14.76 ppm; ESI-HRMS: calcd. For  $\text{C}_{11}\text{H}_{11}\text{NO}_3+\text{H}$  206.0817, found 206.0815.

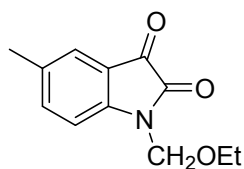

**1-(ethoxymethyl)-5-methylindoline-2,3-dione (1q):** 83%, orange solid;  $R_f$  (ethyl acetate : petroleum ether = 1:2) = 0.55; m.p. 94-95 °C; IR(KBr): 2970, 1745, 1735, 1619, 1598, 1491, 1456, 1355, 1331, 1298, 1220, 1096  $\text{cm}^{-1}$ ;  $^1\text{H}$  NMR (400 MHz, Chloroform-*d*)  $\delta$  = 7.34 – 7.51 (m, 2H), 7.02 (d,  $J$  = 8.0 Hz, 1H), 5.15 (s, 2H), 3.55 (q,  $J$  = 6.8 Hz, 2H), 2.33 (s, 3H), 1.17 (t,  $J$  = 7.0 Hz, 3H) ppm;  $^{13}\text{C}$  NMR (100 MHz,  $\text{CDCl}_3$ )  $\delta$  = 183.14, 158.39, 148.08, 139.03, 134.03, 125.52, 117.49, 111.39, 70.06, 64.54, 20.63, 14.76 ppm; ESI-HRMS: calcd. For  $\text{C}_{12}\text{H}_{13}\text{NO}_3+\text{H}$  220.0974, found 220.0977.

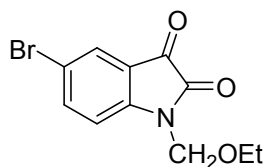

**5-bromo-1-(ethoxymethyl)indoline-2,3-dione (1r):** 67%, orange solid;  $R_f$  (ethyl acetate : petroleum ether = 1:2) = 0.48; m.p. 103-104 °C; IR(KBr): 2968, 1746, 1607, 1473, 1441, 1348, 1320, 1284, 1223, 1093, 1077  $\text{cm}^{-1}$ ;  $^1\text{H}$  NMR (400 MHz, Chloroform-*d*)  $\delta$  = 7.87 – 7.63 (m, 2H), 7.07 (dd,  $J$  = 8.2, 0.6 Hz, 1H), 5.18 (s, 2H), 3.56 (q,  $J$  = 7.0 Hz, 2H), 1.19 (t,  $J$  = 7.0 Hz, 3H) ppm;  $^{13}\text{C}$  NMR (100 MHz,  $\text{CDCl}_3$ )  $\delta$  = 181.81, 157.44, 148.89, 140.80, 128.05, 118.63, 117.16, 113.43, 70.18, 64.75, 14.75 ppm; ESI-HRMS: calcd. For  $\text{C}_{11}\text{H}_{10}\text{BrNO}_3+\text{H}$  283.9922, found 283.9915.

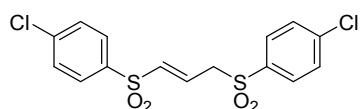

**(E)-4,4'-(prop-1-ene-1,3-diyl)bis(chlorobenzene) (3b):** white solid;  $R_f$  (ethyl acetate : petroleum ether = 1:2) = 0.47; m.p. 135-136 °C; IR(KBr): 2361, 2342, 1577, 1559, 1473, 1396, 1320, 1279, 1150, 1086, 1012  $\text{cm}^{-1}$ ;  $^1\text{H}$  NMR (400 MHz, Chloroform-*d*)  $\delta$  = 7.65 – 7.85 (m, 4H), 7.49 – 7.65 (m, 2H), 7.40 – 7.49 (m, 2H), 6.81 (dt,  $J$  = 15.4, 7.8 Hz, 1H), 6.37 (d,  $J$  = 15.2 Hz, 1H), 3.95 (d,  $J$  = 7.6 Hz, 2H) ppm;  $^{13}\text{C}$  NMR (100 MHz,  $\text{CDCl}_3$ )  $\delta$  = 141.37, 140.93, 138.51, 137.60, 135.96, 131.49, 129.86, 129.78, 129.71, 129.33, 57.73 ppm; ESI-HRMS: calcd. For  $\text{C}_{15}\text{H}_{12}\text{Cl}_2\text{S}_2\text{O}_4+\text{H}$  390.9632, found 390.9626.

Following the general procedure, treatment of **1a** (65 mg, 0.37 mmol) with **2** (32 mg, 0.37 mmol), **3a** (100 mg, 0.31 mmol) and 4-TFBA (59 mg, 0.31 mmol) in toluene (2 mL) at 110 °C for 1 h followed by column chromatography afforded the product **4a**:

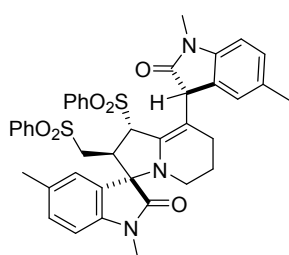

**8'-(1,5-dimethyl-2-oxoindolin-3-yl)-1,5-dimethyl-1'-(phenylsulfonyl)-2'-((phenylsulfonyl)methyl)-1',5',6',7'-tetrahydro-2'H-spiro[indoline-3,3'-indolizin]-2-one (4a);** 93 mg; white solid;  $R_f$  (ethyl acetate :

petroleum ether = 1:1) = 0.45; m.p. 215-216 °C; IR(KBr): 3059, 2926, 2841, 2356, 2343, 1700, 1621, 1499, 1447, 1363, 1353, 1324, 1312, 1282, 1204, 1169, 1144, 1084 cm<sup>-1</sup>; <sup>1</sup>H NMR (400 MHz, Chloroform-*d*) δ = 8.10 (d, *J* = 7.6 Hz, 2H), 7.69-7.77 (m, 2H), 7.56 (t, *J* = 8.0 Hz, 4H), 7.45 – 7.51 (m, 2H), 7.23 (s, 1H), 7.14 (d, *J* = 7.6 Hz, 1H), 7.07 (d, *J* = 7.6 Hz, 1H), 6.71 (dd, *J* = 8.0, 2.0 Hz, 2H), 5.74 (s, 1H), 5.35 (s, 1H), 4.36 (d, *J* = 7.6 Hz, 1H), 4.03 (dd, *J* = 14.8, 2.4 Hz, 1H), 3.80 (dd, *J* = 14.8, 11.6 Hz, 1H), 3.23 (s, 3H), 3.20 (s, 3H), 2.88 (ddd, *J* = 11.6, 7.4, 2.2 Hz, 1H), 2.40 (s, 3H), 2.28 (s, 3H), 2.12 (dd, *J* = 7.2, 3.6 Hz, 2H), 1.60 – 1.72 (m, 2H), 1.30 – 1.48 (m, 2H) ppm; <sup>13</sup>C NMR (100 MHz, CDCl<sub>3</sub>) δ = 177.20, 174.18, 143.38, 141.80, 137.94, 134.62, 134.26, 133.70, 133.55, 132.30, 131.87, 131.28, 130.50, 130.33, 128.89, 128.70, 128.58, 128.56, 128.26, 128.12, 125.68, 125.51, 125.47, 124.95, 124.59, 108.46, 108.28, 107.36, 71.87, 69.86, 56.75, 49.83, 42.14, 41.33, 26.31, 26.21, 22.64, 21.27, 21.03, 20.76 ppm; ESI-HRMS: calcd. For C<sub>40</sub>H<sub>39</sub>N<sub>3</sub>O<sub>6</sub>S<sub>2</sub>+H 722.2359, found 722.2358.

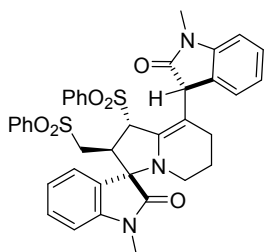

Following the general procedure, treatment of **1b** (60 mg, 0.37 mmol) with **2** (32 mg, 0.37 mmol), **3a** (100 mg, 0.31 mmol) and 4-TFBA (59 mg, 0.31 mmol) in toluene (2 mL) at 110 °C for 1 h followed by column chromatography afforded the product **4b**:

**1-methyl-8'-(1-methyl-2-oxoindolin-3-yl)-1'-(phenylsulfonyl)-2'-((phenylsulfonyl)methyl)-1',5',6',7'-tetrahydro-2'H-spiro[indoline-3,3'-indolizin]-2-one (**4b**);** 94 mg; white solid; *R<sub>f</sub>* (ethyl acetate : petroleum ether = 1:1) = 0.42; m.p. 205-206 °C; IR (KBr): 3055, 2925, 2841, 1709, 1613, 1493, 1470, 1447, 1422, 1374, 1346, 1310, 1279, 1209, 1184, 1145, 1134, 1084 cm<sup>-1</sup>; <sup>1</sup>H NMR (400 MHz, Chloroform-*d*) δ = 8.20 (d, *J* = 7.6 Hz, 2H), 7.67 – 7.76 (m, 2H), 7.60 (t, *J* = 7.8 Hz, 2H), 7.55 (d, *J* = 4.4 Hz, 4H), 7.45 (d, *J* = 7.2 Hz, 1H), 7.36 (td, *J* = 8.3, 1.2 Hz, 1H), 7.26 – 7.31 (m, 1H), 7.12 (t, *J* = 7.4 Hz, 1H), 6.99 (t, *J* = 7.4 Hz, 1H), 6.82 (dd, *J* = 8.0, 4.0 Hz, 2H), 6.16 (d, *J* = 7.2 Hz, 1H), 5.41 (s, 1H), 4.40 (d, *J* = 7.6 Hz, 1H), 4.02 (dd, *J* = 14.6, 2.2 Hz, 1H), 3.71 (dd, *J* = 14.8, 11.6 Hz, 1H), 3.26 (s, 3H), 3.23 (s, 3H), 3.07 (ddd, *J* = 11.6, 7.6, 2.4 Hz, 1H), 2.04 – 2.17 (m, 2H), 1.54 – 1.74 (m, 2H), 1.26 – 1.47 (m, 2H) ppm; <sup>13</sup>C NMR (100 MHz, CDCl<sub>3</sub>) δ = 177.18, 174.34, 145.68, 144.13, 138.23, 134.76, 134.42, 133.66, 133.50, 131.27, 130.52, 130.31, 129.04, 128.59, 128.49, 127.88, 125.40, 124.09, 123.84, 122.89, 122.69, 108.81, 108.57, 107.64, 71.98, 69.58, 56.78, 49.71, 42.26, 41.15, 26.28, 26.17, 22.61, 20.72 ppm; ESI-HRMS: calcd. For C<sub>38</sub>H<sub>35</sub>N<sub>3</sub>O<sub>6</sub>S<sub>2</sub>+Na 716.1865, found 716.1875.

Following the general procedure, treatment of **1c** (71 mg, 0.37 mmol) with **2** (32 mg, 0.37 mmol), **3a**(100 mg, 0.31 mmol) and 4-TFBA (59 mg, 0.31 mmol) in toluene (2 mL) at 110 °C for 1 h followed by column chromatography afforded the product **4c**:

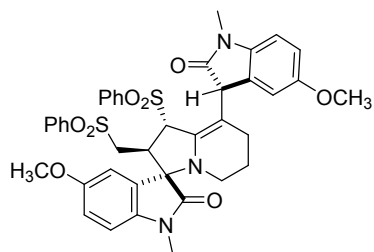

**5-methoxy-8'-(5-methoxy-1-methyl-2-oxoindolin-3-yl)-1-methyl-1'-(phenylsulfonyl)-2'-((phenylsulfonyl)methyl)-1',5',6',7'-tetrahydro-2'H-spiro[indoline-3,3'-indolizin]-2-one**

(**4c**); 110 mg; white solid;  $R_f$  (ethyl acetate : petroleum ether = 1:1) = 0.30; m.p. 218-219 °C; IR(KBr): 3003, 2926, 2841, 2357, 2343, 1699, 1671, 1542, 1521, 1507, 1498, 1473, 1447, 1363, 1313, 1288, 1142, 1084  $\text{cm}^{-1}$ ;  $^1\text{H}$  NMR (400 MHz, Chloroform-*d*)  $\delta$  = 8.15 (d,  $J$  = 7.2 Hz, 2H), 7.67 – 7.75 (m, 2H), 7.51 – 7.64 (m, 6H), 7.20 – 7.22 (m, 1H), 6.86 (dd,  $J$  = 8.4, 2.4 Hz, 1H), 6.77 – 6.82 (m, 1H), 6.71 (dd,  $J$  = 8.4, 4.8 Hz, 2H), 5.77 (d,  $J$  = 2.4 Hz, 1H), 5.38 (s, 1H), 4.39 (d,  $J$  = 7.6 Hz, 1H), 4.04 (dd,  $J$  = 14.6, 2.2 Hz, 1H), 3.87 (s, 3H), 3.75 (s, 3H), 3.68 – 3.75 (m, 1H), 3.23 (s, 3H), 3.18 (s, 3H), 2.98 (ddd,  $J$  = 11.6, 7.6, 2.2 Hz, 1H), 2.00 – 2.15 (m, 2H), 1.67 – 1.78 (m, 1H), 1.21 – 1.56 (m, 3H) ppm;  $^{13}\text{C}$  NMR (100 MHz,  $\text{CDCl}_3$ )  $\delta$  = 176.68, 173.69, 156.35, 156.01, 139.17, 138.16, 137.61, 134.79, 134.34, 133.63, 133.53, 131.28, 130.05, 129.01, 128.53, 128.50, 126.45, 114.42, 112.67, 111.07, 111.05, 109.18, 108.91, 107.95, 72.22, 69.55, 56.73, 55.87, 55.71, 50.04, 42.27, 41.26, 26.33, 26.16, 22.50, 20.75 ppm; ESI-HRMS: calcd. For  $\text{C}_{40}\text{H}_{39}\text{N}_3\text{O}_8\text{S}_2+\text{H}$  754.2257, found 754.2244.

Following the general procedure, treatment of **1d** (81 mg, 0.37 mmol) with **2** (32 mg, 0.37 mmol), **3a** (100 mg, 0.31 mmol) and 4-TFBA (59 mg, 0.31 mmol) in toluene (2 mL) at 110 °C for 1 h followed by column chromatography afforded the product **4d**:

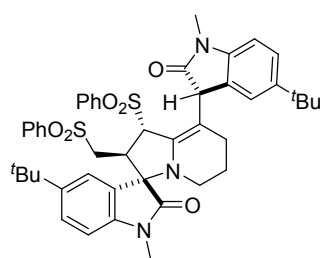

**5-(tert-butyl)-8'-(5-(tert-butyl)-1-methyl-2-oxoindolin-3-yl)-1-methyl-1'-(phenylsulfonyl)-2'-((phenylsulfonyl)methyl)-1',5',6',7'-tetrahydro-2'H-spiro[indoline-3,3'-indolizin]-2-one (**4d**);** 127 mg; white solid;  $R_f$  (ethyl acetate : petroleum ether = 1:1) = 0.65; m.p. 213-214 °C; IR(KBr): 3059, 2954, 2908, 2358, 2342, 1710, 1622, 1500, 1472, 1459, 1447, 1369, 1348, 1311, 1279, 1209, 1143, 1082  $\text{cm}^{-1}$ ;  $^1\text{H}$

NMR (400 MHz, Chloroform-*d*)  $\delta$  = 8.15 (d,  $J$  = 7.2 Hz, 2H), 7.68 – 7.75 (m, 2H), 7.53 – 7.67 (m, 7H), 7.34 (dd,  $J$  = 8.4, 2.0 Hz, 1H), 7.27 – 7.31 (m, 1H), 6.73 (d,  $J$  = 8.0 Hz, 2H), 6.36 (d,  $J$  = 2.0 Hz, 1H), 5.39 (s, 1H), 4.44 (d,  $J$  = 8.0 Hz, 1H), 4.03 (dd,  $J$  = 14.8, 2.0 Hz, 1H), 3.73 (dd,  $J$  = 14.8, 11.6 Hz, 1H), 3.24 (s, 3H), 3.18 (s, 3H), 3.09 (ddd,  $J$  = 11.6, 7.6, 2.0 Hz, 1H), 1.96 – 2.14 (m, 2H), 1.49 – 1.77 (m, 3H), 1.38 (s, 9H), 1.33 – 1.36 (m, 1H), 1.31 (s, 9H) ppm;  $^{13}\text{C}$  NMR (100 MHz,  $\text{CDCl}_3$ )  $\delta$  = 177.27, 173.92, 146.22, 145.60, 143.31, 141.71, 138.63, 134.75, 134.11, 133.71, 133.59, 131.24, 129.02, 128.52, 128.51, 128.49, 126.70, 124.90, 124.08, 121.80, 120.84, 109.25, 107.74, 106.83, 72.33, 69.50, 56.77, 49.91, 42.36, 41.00, 34.72, 34.61, 31.65, 31.61, 26.23, 25.93, 22.63, 20.77 ppm; ESI-HRMS: calcd. For  $\text{C}_{46}\text{H}_{51}\text{N}_3\text{O}_6\text{S}_2+\text{H}$  806.3298, found 806.3295.

Following the general procedure, treatment of **1e** (67 mg, 0.37 mmol) with **2** (32 mg, 0.37 mmol), **3a** (100 mg, 0.31 mmol) and 4-TFBA (59 mg, 0.31 mmol) in toluene (2 mL) at 110 °C for 1 h followed by column chromatography afforded the product **4e**:

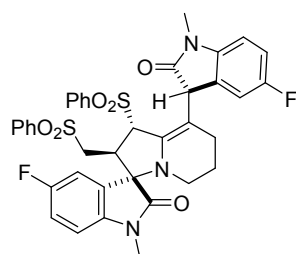

**5-fluoro-8'-(5-fluoro-1-methyl-2-oxoindolin-3-yl)-1-methyl-1'-(phenylsulfonyl)-2'-((phenylsulfonyl)methyl)-1',5',6',7'-tetrahydro-**

**2'H-spiro[indoline-3,3'-indolizin]-2-one (4e)**; 71 mg; white solid;  $R_f$  (ethyl acetate : petroleum ether = 1:1) = 0.51; m.p. 210-211°C; IR(KBr): 3048, 2950, 2902, 2351, 2340, 1710, 1612, 1510, 1479, 1459, 1437, 1368, 1348, 1301, 1249, 1209, 1113, 1081  $\text{cm}^{-1}$ ;  $^1\text{H}$  NMR (400 MHz, Chloroform-*d*)  $\delta$  = 8.16 (d,  $J$  = 7.6 Hz, 2H), 7.71 – 7.78 (m, 2H), 7.57 – 7.64 (m, 6H), 7.22 – 7.25 (m, 1H), 7.05 (td,  $J$  = 8.8, 2.8 Hz, 1H), 6.98 (td,  $J$  = 8.6, 2.4 Hz, 1H), 6.74 (td,  $J$  = 8.8, 4.0 Hz, 2H), 5.86 (dd,  $J$  = 7.8, 2.6 Hz, 1H), 5.39 (s, 1H), 4.35 (d,  $J$  = 7.6 Hz, 1H), 4.01 (dd,  $J$  = 14.6, 2.2 Hz, 1H), 3.70 (dd,  $J$  = 14.6, 11.6 Hz, 1H), 3.25 (s, 3H), 3.22 (s, 3H), 3.00 (ddd,  $J$  = 11.8, 7.6, 2.2 Hz, 1H), 2.02 – 2.20 (m, 2H), 1.59 – 1.77 (m, 2H), 1.23 – 1.50 (m, 2H) ppm;  $^{13}\text{C}$  NMR (100 MHz,  $\text{CDCl}_3$ )  $\delta$  = 176.63, 173.89, 160.60 (d,  $J$  = 31.0 Hz), 158.20 (d,  $J$  = 33.0 Hz), 141.68 (d,  $J$  = 1.8 Hz), 140.11 (d,  $J$  = 1.6 Hz), 138.12, 135.01, 134.67, 133.83, 133.31, 131.22, 130.20 (d,  $J$  = 8.1 Hz), 129.14, 128.71, 128.39, 126.99 (d,  $J$  = 7.7 Hz), 116.46 (d,  $J$  = 23.3 Hz), 114.16 (d,  $J$  = 23.4 Hz), 112.40, 112.14 (d,  $J$  = 2.0 Hz), 111.88, 109.21 (d,  $J$  = 7.8 Hz), 108.60, 108.05 (d,  $J$  = 8.0 Hz), 72.05, 69.44, 56.61, 49.99, 42.29, 41.16, 26.43, 26.31, 22.53, 20.66 ppm; ESI-HRMS: calcd. For  $\text{C}_{38}\text{H}_{33}\text{N}_3\text{O}_6\text{S}_2\text{F}_2+\text{H}$  730.1857, found 730.1836.

Following the general procedure, treatment of **1f** (73 mg, 0.37 mmol) with **2** (32 mg, 0.37 mmol), **3a** (100 mg, 0.31 mmol) and 4-TFBA (59 mg, 0.31 mmol) in toluene (2 mL) at 110 °C for 1 h followed by

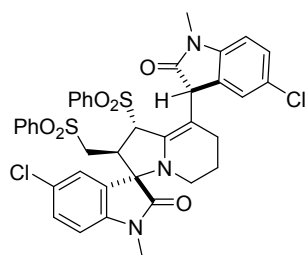

column chromatography afforded the product **4f**:

**5-chloro-8'-(5-chloro-1-methyl-2-oxoindolin-3-yl)-1-methyl-1'-(phenylsulfonyl)-2'-((phenylsulfonyl)methyl)-1',5',6',7'-tetrahydro-2'H-spiro[indoline-3,3'-indolizin]-2-one (4f)**; 107 mg; white solid;  $R_f$  (ethyl acetate : petroleum ether = 1:1) = 0.55; m.p. 190-191 °C; IR(KBr): 3056; 2953, 2913, 2358, 2343, 1716, 1685, 1558, 1542, 1490, 1436,

1339, 1320, 1309, 1281, 1216, 1145, 1082  $\text{cm}^{-1}$ ;  $^1\text{H}$  NMR (400 MHz, Chloroform-*d*)  $\delta$  = 8.21 (d,  $J$  = 7.6 Hz, 2H), 7.67 – 7.78 (m, 2H), 7.52 – 7.65 (m, 6H), 7.31 – 7.36 (m, 1H), 7.24 – 7.28 (m, 1H), 7.17 – 7.22 (m, 1H), 6.99 – 7.05 (m, 1H), 6.86 – 6.93 (m, 1H), 6.05 (d,  $J$  = 7.2 Hz, 1H), 5.39 (s, 1H), 4.35 (d,  $J$  = 7.6 Hz, 1H), 3.99 (dd,  $J$  = 14.4, 2.0 Hz, 1H), 3.61 – 3.66 (m, 4H), 3.57 (s, 3H), 3.07 (ddd,  $J$  = 11.6, 7.8, 2.2 Hz, 1H), 2.02 – 2.20 (m, 2H), 1.65 – 1.77 (m, 1H), 1.28 – 1.59 (m, 3H) ppm;  $^{13}\text{C}$  NMR (100 MHz,  $\text{CDCl}_3$ )  $\delta$  = 177.11, 174.67, 141.51, 139.88, 138.38, 134.96, 134.56, 133.78, 132.55, 133.40, 131.27, 131.19, 130.25, 129.10, 128.67, 128.34, 128.23, 123.63, 123.49, 122.62, 122.34, 116.15, 115.06, 108.96, 71.59, 69.32, 56.58, 49.56, 42.33, 41.38, 29.62, 29.59, 22.53, 20.67 ppm;  $\text{C}_{38}\text{H}_{33}\text{N}_3\text{O}_6\text{S}_2\text{Cl}_2+\text{H}$  762.1266, found 762.1245.

Following the general procedure, treatment of **1g** (89 mg, 0.37 mmol) with **2** (32 mg, 0.37 mmol), **3a** (100 mg, 0.31 mmol) and 4-TFBA (59 mg, 0.31 mmol) in toluene (2 mL) at 110 °C for 1 h followed by column chromatography afforded the product **4g**:

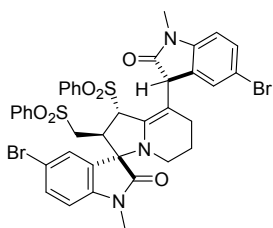

**5-bromo-8'-(5-bromo-1-methyl-2-oxoindolin-3-yl)-1-methyl-1'-**

**(phenylsulfonyl)-2'-((phenylsulfonyl)methyl)-1',5',6',7'-tetrahydro-2'H-**

**spiro[indoline-3,3'-indolizin]-2-one (4g);** 102 mg; white solid;  $R_f$  (ethyl acetate : petroleum ether = 1:1) = 0.55; m.p. 198-199 °C; IR(KBr): 3057, 2913, 1840, 2358, 2342, 1715, 1609, 1488, 1474, 1447, 1434, 1362, 1340,

1319, 1278, 1214, 1182, 1140, 1084  $\text{cm}^{-1}$ ;  $^1\text{H}$  NMR (400 MHz, Chloroform-*d*)  $\delta$  = 7.94 (d,  $J$  = 7.6 Hz, 2H), 7.72 – 7.85 (m, 2H), 7.68 (t,  $J$  = 7.8 Hz, 2H), 7.56 (t,  $J$  = 7.8 Hz, 2H), 7.45 – 7.53 (m, 4H), 7.42 (dd,  $J$  = 8.0, 2.0 Hz, 1H), 6.71 (dd,  $J$  = 8.4, 6.4 Hz, 2H), 5.96 (d,  $J$  = 2.0 Hz, 1H), 5.36 (s, 1H), 4.31 (d,  $J$  = 7.2 Hz, 1H), 4.03 (dd,  $J$  = 14.8, 2.2 Hz, 1H), 3.79 (dd,  $J$  = 14.8, 11.8 Hz, 1H), 3.24 (s, 3H), 3.21 (s, 3H), 2.74 (ddd,  $J$  = 11.8, 7.6, 2.0 Hz, 1H), 2.08 – 2.18 (m, 2H), 1.59 – 1.73 (m, 2H), 1.34 – 1.51 (m, 2H) ppm;  $^{13}\text{C}$  NMR (100 MHz,  $\text{CDCl}_3$ )  $\delta$  = 176.39, 173.46, 144.92, 143.23, 137.32, 134.95, 134.72, 133.80, 133.17, 132.93, 131.05, 130.93, 130.47, 129.23, 128.79, 128.73, 127.84, 127.21, 126.98, 115.54, 115.16, 110.10, 109.15, 107.99, 71.64, 69.61, 56.50, 49.71, 42.12, 41.37, 26.39, 26.34, 22.52, 20.65 ppm; ESI-HRMS: calcd. For  $\text{C}_{38}\text{H}_{33}\text{N}_3\text{O}_6\text{S}_2\text{Br}_2+\text{H}$  850.0256, found 850.0240.

Following the general procedure, treatment of **1h** (91 mg, 0.37 mmol) with **2** (32 mg, 0.37 mmol), **3a** (100 mg, 0.31 mmol) and 4-TFBA (59 mg, 0.31 mmol) in toluene (2 mL) at 110 °C for 1.5 h followed by column chromatography afforded the product **4h**:

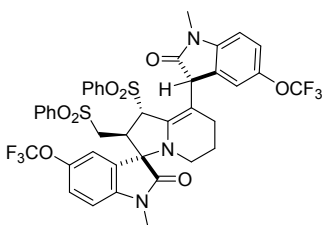

**1-methyl-8'-(1-methyl-2-oxo-5-(trifluoromethoxy)indolin-3-yl)-1'-**

**(phenylsulfonyl)-2'-((phenylsulfonyl)methyl)-5-(trifluoromethoxy)-**

**1',5',6',7'-tetrahydro-2'H-spiro[indoline-3,3'-indolizin]-2-one (4h);**

84 mg; white solid;  $R_f$  (ethyl acetate : petroleum ether = 1:1) = 0.55; m.p. 169-170 °C; IR(KBr): 3064, 2936, 2844, 2358, 2342, 1747, 1649,

1623, 1541, 1507, 1497, 1473, 1313, 1261, 1217, 1168, 1146, 1086  $\text{cm}^{-1}$ ;  $^1\text{H}$  NMR (400 MHz, Chloroform-*d*)  $\delta$  = 8.10 (d,  $J$  = 7.6 Hz, 2H), 7.70 – 7.79 (m, 2H), 7.52 – 7.67 (m, 6H), 7.35 (d,  $J$  = 2.4 Hz, 1H), 7.13 – 7.24 (m, 2H), 6.80 (dd,  $J$  = 8.4, 6.0 Hz, 2H), 6.03 (s, 1H), 5.39 (s, 1H), 4.36 (d,  $J$  = 7.6 Hz, 1H), 4.00 (dd,  $J$  = 14.8, 2.0 Hz, 1H), 3.71 (dd,  $J$  = 14.4, 11.6 Hz, 1H), 3.26 (s, 3H), 3.23 (s, 3H), 3.00 (ddd,  $J$  = 11.6, 7.6, 2.9 Hz, 1H), 2.02 – 2.16 (m, 2H), 1.60 – 1.76 (m, 1H), 1.23 – 1.55 (m, 3H) ppm;  $^{13}\text{C}$  NMR (100 MHz,  $\text{CDCl}_3$ )  $\delta$  = 176.71, 173.86, 145.07, 144.79, 144.33, 142.79, 137.99, 135.10, 134.66, 133.91, 133.13, 131.09, 129.97, 129.20, 128.74, 128.38, 127.01, 123.33, 120.99, 118.08, 117.26, 109.15, 108.34, 108.02, 72.00, 69.30, 56.50, 49.87, 42.30, 41.07, 26.46, 26.29, 22.55, 20.62 ppm; ESI-HRMS: calcd. For  $\text{C}_{40}\text{H}_{33}\text{N}_3\text{O}_8\text{S}_2\text{F}_6+\text{H}$  863.1692, found 863.1666.

Following the general procedure, treatment of **1j** (73 mg, 0.37 mmol) with **2** (32 mg, 0.37 mmol), **3a** (100 mg, 0.31 mmol) and 4-TFBA (59 mg, 0.31 mmol) in toluene (2 mL) at 110 °C for 1 h followed by column chromatography afforded the product **4j**:

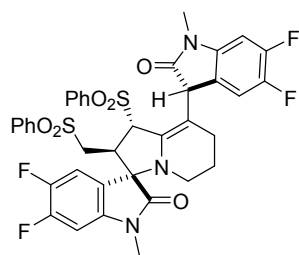

**8'-(5,6-difluoro-1-methyl-2-oxoindolin-3-yl)-5,6-difluoro-1-methyl-1'-(phenylsulfonyl)-2'-((phenylsulfonyl)methyl)-1',5',6',7'-tetrahydro-2'H-spiro[indoline-3,3'-indolizin]-2-one (4j)**; 58 mg; white solid;  $R_f$  (ethyl acetate : petroleum ether = 1:1) = 0.48; m.p. 198-199 °C; IR(KBr): 3063, 2930, 2842, 2358, 2342, 1717, 1626, 1508, 1471, 1448, 1427, 1395, 1310, 1253, 1206, 1144, 1132, 1083  $\text{cm}^{-1}$ ;  $^1\text{H}$  NMR (400

MHz, Chloroform-*d*)  $\delta$  = 8.21 (d,  $J$  = 7.6 Hz, 2H), 7.70-7.82 (m, 2H), 7.46 – 7.70 (m, 6H), 7.30 (t,  $J$  = 8.4 Hz, 1H), 6.66 (ddd,  $J$  = 8.6, 6.2, 2.0 Hz, 2H), 6.02 (t,  $J$  = 8.2 Hz, 1H), 5.34 (s, 1H), 4.32 (d,  $J$  = 7.6 Hz, 1H), 3.99 (dd,  $J$  = 14.8, 2.4 Hz, 1H), 3.62 (dd,  $J$  = 14.4, 11.6 Hz, 1H), 3.22 (s, 3H), 3.19 (s, 3H), 3.02 – 3.13 (m, 1H), 1.99 – 2.18 (m, 2H), 1.64 – 1.78 (m, 1H), 1.15 – 1.56 (m, 3H), ppm;  $^{13}\text{C}$  NMR (100 MHz,  $\text{CDCl}_3$ )  $\delta$  = 176.63, 174.00, 138.35, 138.32, 135.03, 134.80, 134.66, 134.34 (d,  $J$  = 1.4 Hz), 134.03 (d,  $J$  = 1.7 Hz), 133.97, 133.92, 133.28, 131.24, 129.59, 129.49, 129.37, 129.35, 129.25, 128.77, 128.26, 128.20, 128.10, 128.06, 113.82 (d,  $J$  = 18.6 Hz), 113.62 (d,  $J$  = 16.9 Hz), 108.68, 99.15 (d,  $J$  = 22.7 Hz), 98.41 (d,  $J$  = 60.0 Hz), 71.83, 69.17, 56.49, 49.41, 42.27, 40.98, 26.54, 26.41, 22.43, 20.61 ppm;  $\text{C}_{38}\text{H}_{31}\text{N}_3\text{O}_6\text{S}_2\text{F}_4+\text{H}$  766.1669, found 766.1675.

Following the general procedure, treatment of **1k** (89 mg, 0.37 mmol) with **2** (32 mg, 0.37 mmol), **3a** (100 mg, 0.31 mmol) and 4-TFBA (59 mg, 0.31 mmol) in toluene (2 mL) at 110 °C for 1.5 h followed by column chromatography afforded the product **4k**:

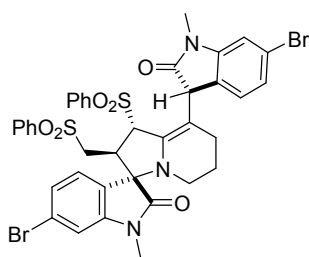

**6-bromo-8'-(6-bromo-1-methyl-2-oxoindolin-3-yl)-1-methyl-1'-(phenylsulfonyl)-2'-((phenylsulfonyl)methyl)-1',5',6',7'-tetrahydro-2'H-spiro[indoline-3,3'-indolizin]-2-one (4k)**; 80 mg;

white solid;  $R_f$  (ethyl acetate : petroleum ether = 1:1) = 0.52; m.p. 195-196 °C; IR(KBr): 3068, 2929, 2839, 2358, 2342, 1714, 1649, 1607, 1491, 1447, 1368, 1313, 1278, 1245, 1207, 1182, 1145, 1085  $\text{cm}^{-1}$ ;  $^1\text{H}$  NMR (400 MHz, Chloroform-*d*)  $\delta$  = 8.23 (d,  $J$  = 7.2 Hz, 2H), 7.71 – 7.79 (m, 2H), 7.52 – 7.69 (m, 6H), 7.29 – 7.32 (m, 1H), 7.26 (dd,  $J$  = 8.0, 1.6 Hz, 1H), 7.16 (dd,  $J$  = 8.0, 1.9 Hz, 1H), 6.99 (s, 2H), 6.07 (d,  $J$  = 8.0 Hz, 1H), 5.35 (s, 1H), 4.38 (d,  $J$  = 7.6 Hz, 1H), 4.01 (dd,  $J$  = 14.6, 2.2 Hz, 1H), 3.66 (dd,  $J$  = 14.4, 11.6 Hz, 1H), 3.26 (s, 3H), 3.22 (s, 3H), 3.13 (ddd,  $J$  = 11.8, 7.6, 2.4 Hz, 1H), 2.02 – 2.19 (m, 2H), 1.59 – 1.82 (m, 2H), 1.25 – 1.51 (m, 2H) ppm;  $^{13}\text{C}$  NMR (100 MHz,  $\text{CDCl}_3$ )  $\delta$  = 176.78, 174.11, 146.81, 145.45, 138.26, 134.82, 134.57, 133.83, 133.34, 131.21, 129.16, 128.64, 128.26, 127.32, 125.67, 125.60, 125.38, 124.99, 124.17, 124.04, 121.39, 112.24, 111.19, 108.62, 71.67, 69.28, 56.51, 49.30, 42.22, 40.77, 26.39, 26.25, 22.48, 20.60 ppm; ESI-HRMS: calcd. For  $\text{C}_{38}\text{H}_{33}\text{N}_3\text{O}_6\text{S}_2\text{Br}_2+\text{H}$  850.0256, found 850.0223.

Following the general procedure, treatment of **1l** (65 mg, 0.37 mmol) with **2** (32 mg, 0.37 mmol), **3a** (100 mg, 0.31 mmol) and 4-TFBA (59 mg, 0.31 mmol) in toluene (2 mL) at 110 °C for 1 h followed by column chromatography afforded the product **4l**:

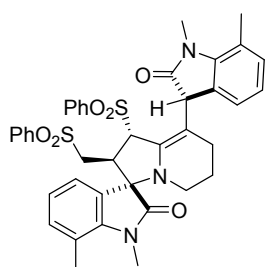

**8'-(1,7-dimethyl-2-oxoindolin-3-yl)-1,7-dimethyl-1'-(phenylsulfonyl)-2'-((phenylsulfonyl)methyl)-1',5',6',7'-tetrahydro-2'H-spiro[indoline-3,3'-indolizin]-2-one (**4l**);** 100 mg; white solid;  $R_f$  (ethyl acetate : petroleum ether = 1:1) = 0.39; m.p. 213-214 °C; IR(KBr): 3058, 2939, 2842, 2358, 2342, 1705, 1604, 1458, 1447, 1363, 1339, 1312, 1278, 1185, 1150, 1134, 1113, 1084  $\text{cm}^{-1}$ ;  $^1\text{H}$  NMR (400 MHz, Chloroform-*d*)  $\delta$  = 8.15 (d,  $J$  = 7.6

Hz, 2H), 7.66 – 7.76 (m, 2H), 7.49 – 7.64 (m, 6H), 7.28 – 7.33 (m, 1H), 7.06 (d,  $J$  = 7.6 Hz, 1H), 6.95 – 7.03 (m, 2H), 6.85 (t,  $J$  = 7.6 Hz, 1H), 5.91 (d,  $J$  = 7.2 Hz, 1H), 5.34 (s, 1H), 4.35 (d,  $J$  = 7.6 Hz, 1H), 4.01 (dd,  $J$  = 14.8, 2.0 Hz, 1H), 3.69 (dd,  $J$  = 14.8, 11.6 Hz, 1H), 3.54 (s, 3H), 3.49 (s, 3H), 2.94 (ddd,  $J$  = 11.6, 7.6, 2.2 Hz, 1H), 2.58 (s, 3H), 2.55 (s, 3H), 2.02 – 2.15 (m, 2H), 1.57 – 1.74 (m, 2H), 1.27 – 1.46 (m, 2H) ppm;  $^{13}\text{C}$  NMR (100 MHz,  $\text{CDCl}_3$ )  $\delta$  = 177.80, 175.02, 143.43, 141.80, 138.15, 134.74, 134.34, 133.91, 133.56, 133.49, 131.57, 131.23, 129.12, 128.96, 128.59, 128.53, 126.01, 122.73, 122.51, 122.04, 121.72, 120.23, 119.12, 108.91, 71.39, 69.61, 56.86, 49.39, 42.25, 41.64, 29.57, 22.61, 20.75, 18.97, 18.94, 14.17 ppm; ESI-HRMS: calcd. For  $\text{C}_{40}\text{H}_{39}\text{N}_3\text{O}_6\text{S}_2+\text{Na}$  744.2178, found 744.2169.

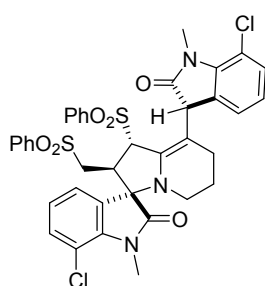

Following the general procedure, treatment of **1m** (73 mg, 0.37 mmol) with **2** (32 mg, 0.37 mmol), **3a** (100 mg, 0.31 mmol) and 4-TFBA (59 mg, 0.31 mmol) in toluene (2 mL) at 110 °C for 1 h followed by column chromatography afforded the product **4m**:

**7-chloro-8'-(7-chloro-1-methyl-2-oxoindolin-3-yl)-1-methyl-1'-(phenylsulfonyl)-2'-((phenylsulfonyl)methyl)-1',5',6',7'-tetrahydro-2'H-spiro[indoline-3,3'-indolizin]-2-one (**4m**);** 86 mg; white solid;  $R_f$  (ethyl acetate : petroleum ether = 1:1)

= 0.63; m.p. 187-188 °C; IR(KBr): 3065, 2940, 2842, 2360, 2342, 1715, 1684, 1558, 1541, 1521, 1507, 1473, 1458, 1363, 1339, 1311, 1239, 1107, 1083  $\text{cm}^{-1}$ ;  $^1\text{H}$  NMR (400 MHz, Chloroform-*d*)  $\delta$  = 8.21 (d,  $J$  = 7.6 Hz, 2H), 7.67 – 7.77 (m, 2H), 7.50 – 7.66 (m, 6H), 7.31 – 7.36 (m, 1H), 7.24 – 7.30 (m, 1H), 7.19 (d,  $J$  = 8.2 Hz, 1H), 7.02 (t,  $J$  = 7.8 Hz, 1H), 6.90 (t,  $J$  = 7.8 Hz, 1H), 6.05 (d,  $J$  = 7.2 Hz, 1H), 5.39 (s, 1H), 4.35 (d,  $J$  = 7.6 Hz, 1H), 3.99 (dd,  $J$  = 14.6, 2.2 Hz, 1H), 3.63 (s, 4H), 3.58 (s, 3H), 3.07 (ddd,  $J$  = 11.6, 7.6, 2.2 Hz, 1H), 2.02 – 2.18 (m, 2H), 1.59 – 1.80 (m, 2H), 1.32 – 1.55 (m, 2H) ppm;  $^{13}\text{C}$  NMR (100 MHz,  $\text{CDCl}_3$ )  $\delta$  = 177.10, 174.63, 141.47, 139.84, 138.29, 134.93, 134.57, 133.79, 133.32, 132.54, 131.23, 131.15, 130.23, 129.09, 128.66, 128.33, 128.18, 123.62, 123.48, 122.59, 122.31, 116.12, 115.04, 108.93, 71.56, 69.25, 56.53, 49.55, 42.31, 41.35, 29.61, 29.59, 22.51, 20.66 ppm; ESI-HRMS: calcd. For  $\text{C}_{38}\text{H}_{33}\text{N}_3\text{O}_6\text{S}_2\text{Cl}_2+\text{H}$  762.1266, found 762.1233.

Following the general procedure, treatment of **1n** (89 mg, 0.37 mmol) with **2** (32 mg, 0.37 mmol), **3a** (100 mg, 0.31 mmol) and 4-TFBA (59 mg, 0.31 mmol) in toluene (2 mL) at 110 °C for 1 h followed by column chromatography afforded the product **4n**:

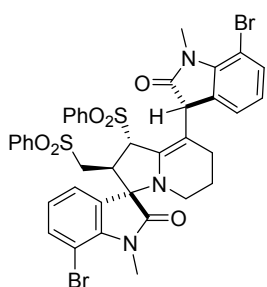

**7-bromo-8'-(7-bromo-1-methyl-2-oxoindolin-3-yl)-1-methyl-1'-**

**(phenylsulfonyl)-2'-((phenylsulfonyl)methyl)-1',5',6',7'-tetrahydro-2'H-**

**spiro[indoline-3,3'-indolizin]-2-one (4n);** 91 mg; white solid;  $R_f$  (ethyl acetate : petroleum ether = 1:1) = 0.63; m.p. 198-199 °C; IR(KBr): 3063, 2944, 2841, 2344, 2307, 1710, 1607, 1578, 1460, 1447, 1364, 1339, 1313, 1198, 1177, 1152, 1132, 1104, 1055  $\text{cm}^{-1}$ ;  $^1\text{H}$  NMR (400 MHz, Chloroform-*d*)

$\delta$  = 8.21 (d,  $J$  = 7.2 Hz, 2H), 7.67 – 7.78 (m, 2H), 7.49 – 7.67 (m, 6H), 7.44 (dd,  $J$  = 8.4, 1.2 Hz, 1H), 7.37 (dd,  $J$  = 7.6, 1.2 Hz, 2H), 6.96 (t,  $J$  = 7.8 Hz, 1H), 6.83 (t,  $J$  = 7.8 Hz, 1H), 6.08 (d,  $J$  = 7.2 Hz, 1H), 5.40 (s, 1H), 4.34 (d,  $J$  = 7.6 Hz, 1H), 3.99 (dd,  $J$  = 14.8, 2.2 Hz, 1H), 3.64 (s, 3H), 3.56 – 3.62 (m, 4H), 3.06 (ddd,  $J$  = 11.8, 7.6, 2.4 Hz, 1H), 1.98 – 2.20 (m, 2H), 1.63 – 1.78 (m, 1H), 1.41 – 1.57 (m, 2H), 1.17 – 1.40 (m, 2H) ppm;  $^{13}\text{C}$  NMR (100 MHz,  $\text{CDCl}_3$ )  $\delta$  = 177.26, 174.80, 142.95, 141.26, 138.26, 135.85, 134.95, 134.57, 133.79, 133.55, 133.30, 131.49, 131.22, 129.08, 128.66, 128.51, 128.33, 124.05, 123.85, 123.12, 122.85, 108.92, 103.01, 102.01, 71.48, 69.25, 56.53, 49.55, 42.30, 41.38, 29.83, 29.79, 22.51, 20.64 ppm; ESI-HRMS: calcd. For  $\text{C}_{38}\text{H}_{33}\text{N}_3\text{O}_6\text{S}_2\text{Br}_2+\text{Na}$  872.0075, found 872.0051.

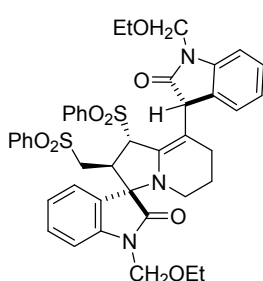

Following the general procedure, treatment of **1p** (76 mg, 0.37 mmol) with **2** (32 mg, 0.37 mmol), **3a** (100 mg, 0.31 mmol) and 4-TFBA (59 mg, 0.31 mmol) in toluene (2 mL) at 110 °C for 1 h followed by column chromatography afforded the product **4p**:

**1-(ethoxymethyl)-8'-(1-(ethoxymethyl)-2-oxoindolin-3-yl)-1'-**

**(phenylsulfonyl)-2'-((phenylsulfonyl)methyl)-1',5',6',7'-tetrahydro-2'H-**

**spiro[indoline-3,3'-indolizin]-2-one (4p)** ; 130 mg; white solid;  $R_f$  (ethyl acetate : petroleum ether = 1:1) = 0.58; m.p. 187-188 °C; IR(KBr): 3055, 2977, 2927, 2354, 2338, 1715, 1614, 1505, 1470, 1455, 1346, 1308, 1210, 1181, 1147, 1133, 1084, 1019  $\text{cm}^{-1}$ ;  $^1\text{H}$  NMR (400 MHz, Chloroform-*d*)  $\delta$  = 8.14 (d,  $J$  = 7.6 Hz, 2H), 7.69 – 7.78 (m, 2H), 7.61 (t,  $J$  = 7.8 Hz, 2H), 7.54 – 7.58 (m, 4H), 7.45 (d,  $J$  = 7.2 Hz, 1H), 7.36 (td,  $J$  = 7.8, 1.2 Hz, 1H), 7.28 (t,  $J$  = 6.6 Hz, 1H), 7.15 (t,  $J$  = 7.2 Hz, 1H), 7.06 (t,  $J$  = 7.6 Hz, 2H), 7.02 (t,  $J$  = 7.6 Hz, 1H), 6.17 (d,  $J$  = 6.8 Hz, 1H), 5.51 (s, 1H), 5.17 – 5.28 (m, 3H), 5.10 (d,  $J$  = 11.2 Hz, 1H), 4.39 (d,  $J$  = 7.6 Hz, 1H), 4.03 (dd,  $J$  = 14.8, 2.2 Hz, 1H), 3.52 – 3.70 (m, 5H), 3.04 – 3.12 (m, 1H), 2.06 – 2.21 (m, 2H), 1.59 – 1.79 (m, 2H), 1.26 – 1.49 (m, 2H), 1.20 (q,  $J$  = 7.0 Hz, 6H) ppm;  $^{13}\text{C}$  NMR (100 MHz,  $\text{CDCl}_3$ )  $\delta$  = 177.39, 174.62, 144.37, 142.50, 138.10, 134.71, 134.47, 133.73, 133.39, 131.15, 130.48, 129.06, 128.64, 128.50, 128.05, 128.00, 124.84, 124.15, 123.84, 123.24,



123.05, 110.06, 109.23, 108.80, 72.21, 70.57, 70.06, 69.45, 64.48, 64.24, 56.66, 49.87, 42.26, 41.01, 22.62, 20.58, 14.96, 14.90 ppm; ESI-HRMS: calcd. For C<sub>42</sub>H<sub>43</sub>N<sub>3</sub>O<sub>8</sub>S<sub>2</sub>+H 782.2570, found 782.2560.

Following the general procedure, treatment of **1q** (82 mg, 0.37 mmol) with **2** (32 mg, 0.37 mmol), **3a** (100 mg, 0.31 mmol) and 4-TFBA (59 mg, 0.31 mmol) in toluene (2 mL) at 110 °C for 1 h followed by column chromatography afforded the product **4q**:

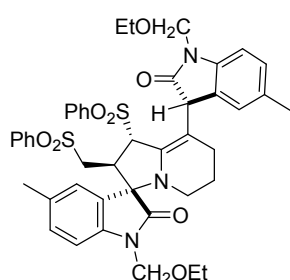

**1-(ethoxymethyl)-8'-(1-(ethoxymethyl)-5-methyl-2-oxoindolin-3-yl)-5-methyl-1'-(phenylsulfonyl)-2'-((phenylsulfonyl)methyl)-1',5',6',7'-**

**tetrahydro-2'H-spiro[indoline-3,3'-indolizin]-2-one (4q);** 99 mg; white solid; *R<sub>f</sub>* (ethyl acetate : petroleum ether = 1:1) = 0.51; m.p. 179-180 °C; IR(KBr): 3056, 2976, 2355, 2339, 1715, 1603, 1496, 1447, 1394, 1367, 1330, 1311, 1281, 1214, 1145, 1133, 1086 cm<sup>-1</sup>; <sup>1</sup>H NMR (400 MHz,

Chloroform-*d*) δ = 8.04 (d, *J* = 7.6 Hz, 2H), 7.71 – 7.78 (m, 2H), 7.54 – 7.60 (m, 4H), 7.49 – 7.53 (m, 2H), 7.15 (d, *J* = 7.6 Hz, 1H), 7.08 (d, *J* = 7.6 Hz, 1H), 6.95 (dd, *J* = 8.0, 5.2 Hz, 2H), 5.78 (s, 1H), 5.45 (s, 1H), 5.15 – 5.27 (m, 3H), 5.06 (d, *J* = 11.2 Hz, 1H), 4.36 (d, *J* = 7.6 Hz, 1H), 4.04 (dd, *J* = 14.8, 2.0 Hz, 1H), 3.74 (dd, *J* = 14.8, 11.6 Hz, 1H), 3.48 – 3.64 (m, 5H), 2.91 (ddd, *J* = 11.8, 7.6, 2.2 Hz, 1H), 2.40 (s, 3H), 2.29 (s, 3H), 2.08 – 2.20 (m, 2H), 1.59 – 1.78 (m, 2H), 1.26 – 1.52 (m, 2H), 1.14 – 1.23 (m, 6H) ppm; <sup>13</sup>C NMR (100 MHz, CDCl<sub>3</sub>) δ = 177.42, 174.46, 142.03, 140.09, 137.75, 134.56, 134.33, 133.64, 133.49, 132.68, 132.24, 131.12, 130.60, 128.91, 128.69, 128.61, 128.30, 128.03, 125.01, 124.92, 124.50, 109.74, 108.92, 108.57, 72.07, 70.55, 70.07, 69.62, 64.33, 64.14, 56.60, 49.93, 42.14, 41.14, 22.60, 21.23, 21.03, 20.59, 14.95, 14.84 ppm; ESI-HRMS: calcd. For C<sub>44</sub>H<sub>47</sub>N<sub>3</sub>O<sub>8</sub>S<sub>2</sub>+H 810.2883, found 810.2867.

Following the general procedure, treatment of **1r** (106 mg, 0.37 mmol) with **2** (32 mg, 0.37 mmol), **3a** (100 mg, 0.31 mmol) and 4-TFBA (59 mg, 0.31 mmol) in toluene (2 mL) at 110 °C for 1 h followed by column chromatography afforded the product **4r**:

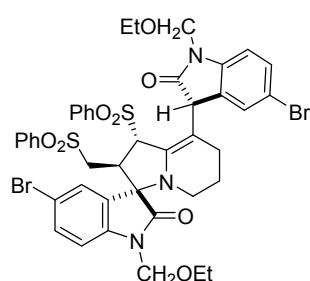

**5-bromo-8'-(5-bromo-1-(ethoxymethyl)-2-oxoindolin-3-yl)-1-(ethoxymethyl)-1'-(phenylsulfonyl)-2'-((phenylsulfonyl)methyl)-**

**1',5',6',7'-tetrahydro-2'H-spiro[indoline-3,3'-indolizin]-2-one (4r);** 106 mg; white solid; *R<sub>f</sub>* (ethyl acetate : petroleum ether = 1:1) = 0.58; m.p. 162-163 °C; IR(KBr): 3058, 2977, 2930, 2356, 2329, 1722, 1608, 1584, 1480, 1446, 1428, 1357, 1323, 1312, 1262, 1207, 1148, 1084 cm<sup>-1</sup>;

<sup>1</sup>H NMR (400 MHz, Chloroform-*d*) δ = 7.88 (d, *J* = 7.6 Hz, 2H), 7.74 – 7.83 (m, 2H), 7.69 (t, *J* = 7.8 Hz, 2H), 7.44 – 7.63 (m, 6H), 7.39 – 7.44 (m, 1H), 6.96 (dd, *J* = 13.2, 8.2 Hz, 2H), 5.99 (d, *J* = 2.0 Hz, 1H), 5.45 (s, 1H), 5.13 – 5.28 (m, 3H), 5.06 (d, *J* = 11.2 Hz, 1H), 4.31 (d, *J* = 7.2 Hz, 1H), 4.05 (dd, *J* = 14.8, 2.0 Hz, 1H), 3.74 (dd, *J* = 14.8, 11.6 Hz, 1H), 3.47 – 3.66 (m, 4H), 2.76 (ddd, *J* = 12.0, 7.6, 2.2

Hz, 1H), 2.08 – 2.23 (m, 2H), 1.62 – 1.78 (m, 2H), 1.29 – 1.54 (m, 2H), 1.14 – 1.25 (m, 6H) ppm; <sup>13</sup>C NMR (100 MHz, CDCl<sub>3</sub>) δ = 176.59, 173.75, 143.54, 141.54, 137.15, 134.94, 134.79, 133.89, 133.17, 133.01, 131.09, 130.93, 130.03, 129.26, 128.83, 128.78, 127.32, 127.28, 126.96, 116.07, 115.70, 111.79, 110.89, 108.06, 71.91, 70.73, 70.13, 69.41, 64.62, 64.33, 56.39, 49.87, 42.15, 41.28, 22.52, 20.55, 14.92, 14.82 ppm; ESI-HRMS: calcd. For C<sub>42</sub>H<sub>41</sub>N<sub>3</sub>O<sub>8</sub>S<sub>2</sub>Br<sub>2</sub>+H 938.0780, found 938.0742.

Following the general procedure, treatment of **1s** (88 mg, 0.37 mmol) with **2** (32 mg, 0.37 mmol), **3a** (100 mg, 0.31 mmol) and 4-TFBA (59 mg, 0.31 mmol) in toluene (2 mL) at 110 °C for 1 h followed by column chromatography afforded the product **4s**:

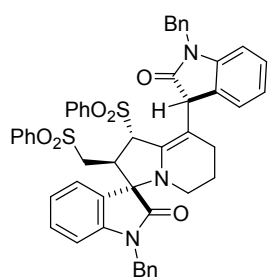

**1-benzyl-8'-(1-benzyl-2-oxoindolin-3-yl)-1'-(phenylsulfonyl)-2'-((phenylsulfonyl)methyl)-1',5',6',7'-tetrahydro-2'H-spiro[indoline-3,3'-indolizin]-2-one (**4s**);** 122 mg; white solid; *R<sub>f</sub>* (ethyl acetate : petroleum ether = 1:1) = 0.61; m.p. 144-145 °C; IR(KBr): 3014, 2946, 2838, 2353, 2321, 1713, 1613, 1486, 1454, 1447, 1359, 1311, 1210, 1181, 1145, 1132, 1083 cm<sup>-1</sup>; <sup>1</sup>H NMR (400 MHz, Chloroform-*d*) δ = 8.24 (d, *J* = 7.6 Hz, 2H),

7.68 – 7.79 (m, 2H), 7.50 – 7.68 (m, 6H), 7.48 (d, *J* = 7.2 Hz, 1H), 7.27 – 7.35 (m, 9H), 7.20 – 7.25 (m, 2H), 7.15 (t, *J* = 7.6 Hz, 1H), 7.08 (t, *J* = 7.4 Hz, 1H), 6.97 (t, *J* = 7.6 Hz, 1H), 6.69 (t, *J* = 8.0 Hz, 2H), 6.23 (d, *J* = 7.2 Hz, 1H), 5.56 (s, 1H), 5.24 (d, *J* = 15.6 Hz, 1H), 5.07 (d, *J* = 16.0 Hz, 1H), 4.91 (d, *J* = 15.6 Hz, 1H), 4.66 (d, *J* = 15.6 Hz, 1H), 4.47 (d, *J* = 7.6 Hz, 1H), 4.05 (dd, *J* = 14.4, 2.0 Hz, 1H), 3.72 (dd, *J* = 14.6, 11.4 Hz, 1H), 3.17 (ddd, *J* = 11.6, 7.6, 2.0 Hz, 1H), 2.12 – 2.30 (m, 2H), 1.62 – 1.90 (m, 2H), 1.29 – 1.53 (m, 2H) ppm; <sup>13</sup>C NMR (100 MHz, CDCl<sub>3</sub>) δ = 177.03, 174.42, 145.06, 145.04, 143.29, 138.40, 136.10, 136.07, 135.70, 135.68, 134.81, 134.44, 133.69, 133.55, 133.53, 131.29, 130.23, 129.06, 128.76, 128.70, 128.63, 128.48, 127.79, 127.59, 127.43, 127.20, 125.36, 124.24, 123.92, 122.87, 122.75, 109.65, 109.14, 108.73, 71.95, 69.59, 56.77, 49.64, 44.25, 43.87, 42.37, 41.10, 22.70, 20.66 ppm; ESI-HRMS: calcd. For C<sub>50</sub>H<sub>43</sub>N<sub>3</sub>O<sub>6</sub>S<sub>2</sub>+H 846.2672, found 846.2654.

Following the general procedure, treatment of **1t** (94 mg, 0.37 mmol) with **2** (32 mg, 0.37 mmol), **3a** (100 mg, 0.31 mmol) and 4-TFBA (59 mg, 0.31 mmol) in toluene (2 mL) at 110 °C for 1 h followed by column chromatography afforded the product **4t**:

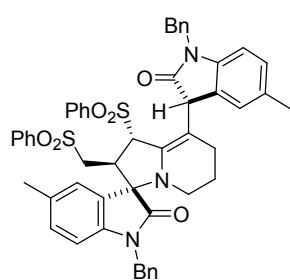

**1-benzyl-8'-(1-benzyl-5-methyl-2-oxoindolin-3-yl)-5-methyl-1'-(phenylsulfonyl)-2'-((phenylsulfonyl)methyl)-1',5',6',7'-tetrahydro-2'H-spiro[indoline-3,3'-indolizin]-2-one (**4t**);** 113 mg; white solid; *R<sub>f</sub>* (ethyl acetate : petroleum ether = 1:1) = 0.60; m.p. 165-166 °C; IR(KBr): 3028, 2918, 2840, 2356, 2339, 1709, 1602, 1584, 1514, 1446, 1346, 1324, 1311, 1281, 1203, 1185, 1144, 1084 cm<sup>-1</sup>; <sup>1</sup>H NMR (400 MHz,

Chloroform-*d*) δ = 8.12 (d, *J* = 7.8 Hz, 2H), 7.74 (t, *J* = 7.2 Hz, 2H), 7.42 – 7.66 (m, 6H), 7.25 – 7.37

(m, 10H), 7.21 – 7.24 (m, 1H), 7.02 (d,  $J = 8.0$  Hz, 1H), 6.94 (d,  $J = 7.6$  Hz, 1H), 6.56 (dd,  $J = 8.0, 4.0$  Hz, 2H), 5.82 (s, 1H), 5.50 (s, 1H), 5.25 (d,  $J = 16.0$  Hz, 1H), 5.05 (d,  $J = 16.0$  Hz, 1H), 4.89 (d,  $J = 15.6$  Hz, 1H), 4.61 (d,  $J = 16.0$  Hz, 1H), 4.43 (d,  $J = 7.6$  Hz, 1H), 4.06 (d,  $J = 16.0$  Hz, 1H), 3.81 (dd,  $J = 14.8, 11.6$  Hz, 1H), 2.93 – 3.04 (m, 1H), 2.34 (s, 3H), 2.25 (s, 3H), 2.20 (t,  $J = 5.6$  Hz, 2H), 1.62 – 1.88 (m, 2H), 1.31 – 1.54 (m, 2H) ppm;  $^{13}\text{C}$  NMR (100 MHz,  $\text{CDCl}_3$ )  $\delta = 177.03, 174.18, 142.71, 140.89, 138.05, 136.19, 135.95, 134.66, 134.29, 133.66, 133.60, 132.31, 131.91, 131.27, 130.30, 128.93, 128.71, 128.69, 128.66, 128.61, 128.04, 127.51, 127.36, 127.24, 127.16, 125.59, 125.08, 124.65, 109.37, 108.89, 108.46, 71.81, 69.79, 56.73, 49.72, 44.27, 43.87, 42.25, 41.23, 22.71, 21.20, 21.01, 20.68$  ppm; ESI-HRMS: calcd. For  $\text{C}_{52}\text{H}_{47}\text{N}_3\text{O}_6\text{S}_2+\text{H}$  874.2985, found 874.2976.

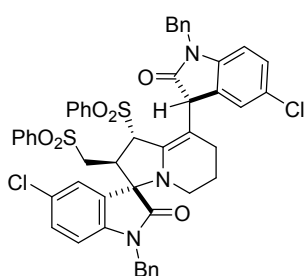

Following the general procedure, treatment of **1u** (101 mg, 0.37 mmol) with **2** (32 mg, 0.37 mmol), **3a** (100 mg, 0.31 mmol) and 4-TFBA (59 mg, 0.31 mmol) in toluene (2 mL) at 110 °C for 1 h followed by column chromatography afforded the product **4u**:

**1-benzyl-8'-(1-benzyl-5-chloro-2-oxoindolin-3-yl)-5-chloro-1'-(phenylsulfonyl)-2'-((phenylsulfonyl)methyl)-1',5',6',7'-tetrahydro-**

**2'H-spiro[indoline-3,3'-indolizin]-2-one (4u)**; 133 mg; white solid;  $R_f$  (ethyl acetate : petroleum ether = 1:1) = 0.61; m.p. 195-196 °C; IR(KBr): 3029, 2918, 2840, 2356, 2329, 1710, 1602, 1584, 1496, 1446, 1346, 1324, 1311, 1281, 1185, 1144, 1130, 1084  $\text{cm}^{-1}$ ;  $^1\text{H}$  NMR (400 MHz, Chloroform-*d*)  $\delta = 8.02$  (d,  $J = 7.6$  Hz, 2H), 7.73 – 7.81 (m, 2H), 7.63 – 7.68 (m, 2H), 7.59 (t,  $J = 7.8$  Hz, 2H), 7.52 – 7.56 (m, 2H), 7.43 – 7.46 (m, 1H), 7.26 – 7.37 (m, 10H), 7.20 (dd,  $J = 8.4, 2.0$  Hz, 1H), 7.10 – 7.14 (m, 1H), 6.59 (t,  $J = 8.4$  Hz, 2H), 5.94 (d,  $J = 2.0$  Hz, 1H), 5.51 (s, 1H), 5.26 (d,  $J = 16.0$  Hz, 1H), 5.06 (d,  $J = 15.6$  Hz, 1H), 4.87 (d,  $J = 15.6$  Hz, 1H), 4.61 (d,  $J = 16.0$  Hz, 1H), 4.39 (d,  $J = 7.2$  Hz, 1H), 4.07 (dd,  $J = 14.8, 2.0$  Hz, 1H), 3.79 (dd,  $J = 14.8, 11.6$  Hz, 1H), 2.85 – 2.94 (m, 2H), 2.15 – 2.25 (m, 2H), 1.64 – 1.86 (m, 2H), 1.22 – 1.45 (m, 2H) ppm;  $^{13}\text{C}$  NMR (100 MHz,  $\text{CDCl}_3$ )  $\delta = 176.45, 173.73, 143.67, 141.80, 137.51, 135.56, 135.22, 135.02, 134.75, 133.87, 133.14, 131.09, 130.16, 130.01, 129.20, 128.86, 128.81, 128.69, 128.27, 128.06, 127.93, 127.78, 127.64, 127.36, 127.30, 127.30, 127.14, 127.14, 124.65, 124.36, 110.79, 109.76, 108.46, 71.69, 69.48, 56.50, 49.69, 44.46, 43.98, 42.24, 41.28, 22.60, 20.61$  ppm; ESI-HRMS: calcd. For  $\text{C}_{50}\text{H}_{41}\text{N}_3\text{O}_6\text{S}_2\text{Cl}_2+\text{H}$  914.1892, found 914.1880.

Following the general procedure, treatment of **1v** (118 mg, 0.37 mmol) with **2** (32 mg, 0.37 mmol), **3a** (100 mg, 0.31 mmol) and 4-TFBA (59 mg, 0.31 mmol) in toluene (2 mL) at 110 °C for 1 h followed by column chromatography afforded the product **4v**:

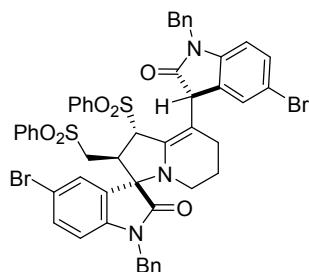

**1-benzyl-8'-(1-benzyl-5-bromo-2-oxoindolin-3-yl)-5-bromo-1'-(phenylsulfonyl)-2'-((phenylsulfonyl)methyl)-1',5',6',7'-tetrahydro-**

**2'H-spiro[indoline-3,3'-indolizin]-2-one (4v)**; 126 mg; white solid;  $R_f$

(ethyl acetate : petroleum ether = 1:1) = 0.61; m.p. 206-207 °C; IR(KBr): 3059, 3030, 2917, 2359, 2341, 1717, 1608, 1583, 1483, 1447, 1429, 1379, 1343, 1315, 1278, 1211, 1143, 1082 cm<sup>-1</sup>; <sup>1</sup>H NMR (400 MHz, Chloroform-*d*) δ = 7.96 (d, *J* = 7.6 Hz, 2H), 7.73 – 7.83 (m, 2H), 7.68 (t, *J* = 7.8 Hz, 2H), 7.47 – 7.63 (m, 5H), 7.26 – 7.38 (m, 12H), 6.55 (t, *J* = 8.8 Hz, 2H), 6.03 (d, *J* = 2.0 Hz, 1H), 5.51 (s, 1H), 5.27 (d, *J* = 15.6 Hz, 1H), 5.06 (d, *J* = 16.0 Hz, 1H), 4.87 (d, *J* = 16.0 Hz, 1H), 4.59 (d, *J* = 16.0 Hz, 1H), 4.38 (d, *J* = 7.6 Hz, 1H), 4.07 (dd, *J* = 14.8, 2.0 Hz, 1H), 3.82 (dd, *J* = 14.8, 11.6 Hz, 1H), 2.83 (ddd, *J* = 11.8, 7.6, 2.0 Hz, 1H), 2.12 – 2.28 (m, 2H), 1.64 – 1.88 (m, 2H), 1.31 – 1.56 (m, 2H) ppm; <sup>13</sup>C NMR (100 MHz, CDCl<sub>3</sub>) δ = 176.33, 173.57, 155.01, 152.52, 144.19, 142.30, 137.38, 135.52, 135.21, 135.01, 134.76, 133.86, 133.11, 132.87, 131.05, 130.85, 130.53, 129.26, 128.87, 128.82, 128.79, 127.82, 127.79, 127.65, 127.37, 127.33, 127.13, 127.04, 115.66, 115.30, 115.21, 111.27, 110.29, 108.37, 71.62, 69.53, 56.50, 49.64, 44.46, 43.97, 42.23, 41.34, 22.60, 20.63 ppm; ESI-HRMS: calcd. For C<sub>50</sub>H<sub>41</sub>N<sub>3</sub>O<sub>6</sub>S<sub>2</sub>Br<sub>2</sub>+H 1002.0882, found 1002.0860.

Following the general procedure, treatment of **1b** (49 mg, 0.31 mmol) with **2** (26 mg, 0.31 mmol), **3b** (100 mg, 0.26 mmol) and 4-TFBA (49 mg, 0.26 mmol) in toluene (2 mL) at 110 °C for 1 h followed by column chromatography afforded the product **4w**:

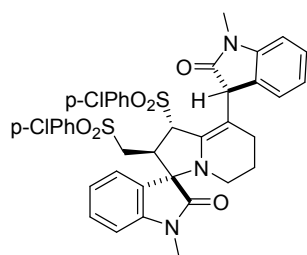

**1'-((4-chlorophenyl)sulfonyl)-2'-(((4-chlorophenyl)sulfonyl)methyl)-1-methyl-8'-(1-methyl-2-oxoindolin-3-yl)-1',5',6',7'-tetrahydro-2'H-spiro[indoline-3,3'-indolizin]-2-one (**4w**)**; 91 mg; white solid; *R<sub>f</sub>* (ethyl acetate : petroleum ether = 1:1) = 0.41; m.p. 196-197 °C; IR(KBr): 3055,

2930, 2839, 2355, 2329, 1705, 1613, 1524, 1494, 1471, 1373, 1346, 1318, 1278, 1210, 1183, 1146, 1089 cm<sup>-1</sup>; <sup>1</sup>H NMR (400 MHz,

Chloroform-*d*) δ = 8.24 (d, *J* = 8.4 Hz, 2H), 7.61 (d, *J* = 8.4 Hz, 2H), 7.46 – 7.57 (m, 4H), 7.43 (d, *J* = 7.2 Hz, 1H), 7.38 (d, *J* = 7.6 Hz, 1H), 7.24 – 7.33 (m, 1H), 7.12 (t, *J* = 7.4 Hz, 1H), 7.06 (t, *J* = 7.6 Hz, 1H), 6.83 (t, *J* = 7.4 Hz, 2H), 6.27 (d, *J* = 7.6 Hz, 1H), 5.35 (s, 1H), 4.42 (d, *J* = 7.6 Hz, 1H), 3.96 (dd, *J* = 14.6, 2.2 Hz, 1H), 3.67 (dd, *J* = 14.8, 11.6 Hz, 1H), 3.26 (s, 3H), 3.23 (s, 3H), 3.04 (ddd, *J* = 11.2, 7.6, 2.2 Hz, 1H), 2.15 – 2.24 (m, 1H), 2.10 (td, *J* = 10.8, 2.8 Hz, 1H), 1.60 – 1.77 (m, 2H), 1.41 – 1.53 (m, 1H), 1.23 – 1.36 (m, 1H) ppm; <sup>13</sup>C NMR (100 MHz, CDCl<sub>3</sub>) δ = 177.06, 174.15, 145.65, 144.14, 141.50, 140.57, 136.76, 134.56, 132.74, 132.16, 130.54, 129.96, 129.35, 128.94, 128.39, 127.97, 125.02, 124.09, 123.75, 122.91, 122.87, 109.40, 108.73, 107.72, 71.95, 69.58, 56.82, 49.67, 42.36, 41.30, 26.29, 26.17, 22.58, 20.79 ppm; ESI-HRMS: calcd. For C<sub>38</sub>H<sub>33</sub>N<sub>3</sub>O<sub>6</sub>S<sub>2</sub>Cl<sub>2</sub>+H 762.1266, found 762.1252.

Following the general procedure, treatment of **1a** (60 mg, 0.31 mmol) with **2** (26 mg, 0.31 mmol), **3b** (100 mg, 0.26 mmol) and 4-TFBA (49 mg, 0.26 mmol) in toluene (2 mL) at 110 °C for 1 h followed by column chromatography afforded the product **4x**:

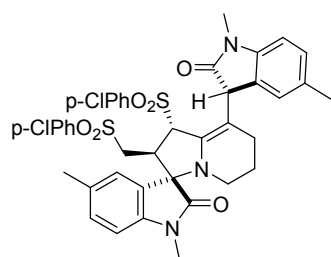

**1'-((4-chlorophenyl)sulfonyl)-2'-(((4-chlorophenyl)sulfonyl)methyl)-8'-(1,5-dimethyl-2-oxoindolin-3-yl)-1,5-dimethyl-1',5',6',7'-tetrahydro-2'H-spiro[indoline-3,3'-indolizin]-2-one (4x);** 95 mg; white solid;  $R_f$  (ethyl acetate : petroleum ether = 1:1) = 0.47; m.p. 199-200 °C; IR(KBr): 3051, 2937, 2839, 2355, 2329, 1700, 1611, 1524, 1484, 1461, 1373, 1336, 1318, 1294, 1210, 1183, 1146, 1085

$\text{cm}^{-1}$ ;  $^1\text{H NMR}$  (400 MHz, Chloroform-*d*)  $\delta$  = 8.13 (d,  $J$  = 8.0 Hz, 2H), 7.58 (d,  $J$  = 8.4 Hz, 2H), 7.52 (d,  $J$  = 8.8 Hz, 2H), 7.40 (d,  $J$  = 8.8 Hz, 2H), 7.20 (s, 1H), 7.16 (dd,  $J$  = 8.0, 1.4 Hz, 1H), 7.08 (d,  $J$  = 7.6 Hz, 1H), 6.72 (dd,  $J$  = 7.8, 4.2 Hz, 2H), 5.73 (d,  $J$  = 1.6 Hz, 1H), 5.29 (s, 1H), 4.37 (d,  $J$  = 7.6 Hz, 1H), 3.96 (dd,  $J$  = 14.8, 2.4 Hz, 1H), 3.79 (dd,  $J$  = 14.8, 11.6 Hz, 1H), 3.23 (s, 3H), 3.20 (s, 3H), 2.80 (ddd,  $J$  = 11.6, 7.6, 2.4 Hz, 1H), 2.39 (s, 3H), 2.32 (s, 3H), 2.10 – 2.22 (m, 2H), 1.64 (d,  $J$  = 9.2 Hz, 2H), 1.35 – 1.53 (m, 2H) ppm;  $^{13}\text{C NMR}$  (100 MHz,  $\text{CDCl}_3$ )  $\delta$  = 177.10, 173.94, 143.29, 141.77, 141.42, 140.45, 136.24, 134.35, 132.65, 132.31, 132.11, 130.54, 130.18, 130.07, 129.41, 129.31, 129.18, 128.97, 128.29, 128.21, 127.63, 108.80, 108.45, 107.46, 71.74, 69.78, 56.75, 49.81, 42.17, 41.43, 26.32, 26.22, 22.61, 21.26, 21.10, 20.79 ppm; ESI-HRMS: calcd. For  $\text{C}_{40}\text{H}_{37}\text{N}_3\text{O}_6\text{S}_2\text{Cl}_2+\text{H}$  790.1579, found 790.1570.

Following the general procedure, treatment of **1g** (74 mg, 0.31 mmol) with **2** (26 mg, 0.31 mmol), **3b** (100 mg, 0.26 mmol) and 4-TFBA (49 mg, 0.26 mmol) in toluene (2 mL) at 110 °C for 1 h followed by column chromatography afforded the product **4y**:

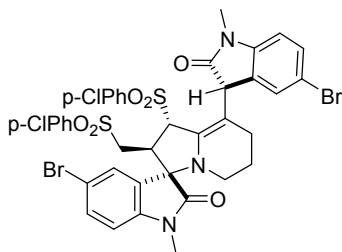

**5-bromo-8'-(5-bromo-1-methyl-2-oxoindolin-3-yl)-1'-((4-chlorophenyl)sulfonyl)-2'-(((4-chlorophenyl)sulfonyl)methyl)-1-methyl-1',5',6',7'-tetrahydro-2'H-spiro[indoline-3,3'-indolizin]-2-one (4y);** 87 mg; white solid;  $R_f$  (ethyl acetate : petroleum ether = 1:1)

= 0.48; m.p. 184-85 °C; IR(KBr): 3084, 2925, 2839, 2355, 2320, 1712, 1609, 1574, 1487, 1475, 1360, 1345, 1325, 1278, 1209, 1184, 1141, 1092  $\text{cm}^{-1}$ ;  $^1\text{H NMR}$  (400 MHz, Chloroform-*d*)  $\delta$  = 7.97 (d,  $J$  = 7.8 Hz, 2H), 7.75 – 7.84 (m, 2H), 7.70 (t,  $J$  = 7.8 Hz, 2H), 7.59 (t,  $J$  = 7.8 Hz, 2H), 7.49 – 7.52 (m, 3H), 7.42 – 7.46 (m, 1H), 6.73 (dd,  $J$  = 8.0, 6.4 Hz, 2H), 5.99 (d,  $J$  = 2.0 Hz, 1H), 5.38 (s, 1H), 4.34 (d,  $J$  = 7.4 Hz, 1H), 4.05 (dd,  $J$  = 14.8, 2.2 Hz, 1H), 3.81 (dd,  $J$  = 14.8, 11.6 Hz, 1H), 3.26 (s, 3H), 3.24 (s, 3H), 2.77 (ddd,  $J$  = 11.8, 7.4, 2.2 Hz, 1H), 2.08 – 2.21 (m, 2H), 1.63 – 1.76 (m, 1H), 1.30 – 1.56 (m, 3H) ppm;  $^{13}\text{C NMR}$  (100 MHz,  $\text{CDCl}_3$ )  $\delta$  = 176.83, 174.16, 146.86, 145.50, 138.31, 134.87, 134.62, 133.88, 133.39, 131.26, 129.21, 128.69, 128.31, 127.37, 125.72, 125.65, 125.43, 125.04, 124.23, 124.09, 121.44, 112.29, 111.24, 108.67, 71.72, 69.33, 56.56, 49.35, 42.27, 40.82, 26.44, 26.30, 22.53, 20.65 ppm; ESI-HRMS: calcd. For  $\text{C}_{38}\text{H}_{31}\text{N}_3\text{O}_6\text{S}_2\text{Cl}_2\text{Br}_2+\text{H}$  917.9476, found 917.9488.

Following the general procedure, treatment of **1a** (60 mg, 0.34 mmol) with **2** (29 mg, 0.34 mmol), **3c** (100 mg, 0.29 mmol) and 4-TFBA (54 mg, 0.29 mmol) in toluene (2 mL) at 110 °C for 1 h followed by column chromatography afforded the product **4z**:

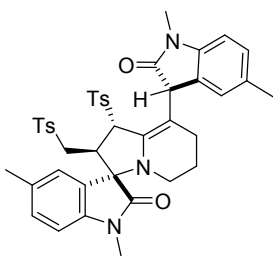

**8'-(1,5-dimethyl-2-oxoindolin-3-yl)-1,5-dimethyl-1'-tosyl-2'-(tosylmethyl)-1',5',6',7'-tetrahydro-2'H-spiro[indoline-3,3'-indolizin]-2-one (**4z**);** 65

mg; white solid;  $R_f$  (ethyl acetate : petroleum ether = 1:1) = 0.62; m.p. 218-219 °C; IR(KBr): 3045, 2926, 2840, 2354, 2321, 1712, 1621, 1598, 1499, 1446, 1363, 1352, 1322, 1309, 1280, 1203, 1142, 1086  $\text{cm}^{-1}$ ;  $^1\text{H}$  NMR (400

MHz, Chloroform-*d*)  $\delta$  = 7.87 – 7.99 (m, 2H), 7.28 – 7.40 (m, 6H), 7.22 (s, 1H), 7.13 (d,  $J$  = 8.0 Hz, 1H), 7.06 (d,  $J$  = 8.0 Hz, 1H), 6.69 (d,  $J$  = 7.8 Hz, 2H), 5.70 (s, 1H), 5.35 (s, 1H), 4.32 (d,  $J$  = 7.2 Hz, 1H), 3.92 – 4.01 (m, 1H), 3.78 (t,  $J$  = 13.2 Hz, 1H), 3.22 (s, 3H), 3.20 (s, 3H), 2.79 – 2.88 (m, 1H), 2.53 (s, 3H), 2.51 (s, 3H), 2.39 (s, 3H), 2.28 (s, 3H), 2.09 – 2.19 (m, 2H), 1.60 – 1.74 (m, 2H), 1.34 – 1.49 (m, 2H) ppm;  $^{13}\text{C}$  NMR (100 MHz,  $\text{CDCl}_3$ )  $\delta$  = 177.15, 174.18, 145.21, 144.55, 143.39, 141.81, 134.90, 134.70, 132.21, 131.63, 131.27, 130.90, 130.21, 129.42, 129.20, 128.81, 128.59, 128.07, 125.97, 124.90, 124.63, 108.17, 108.03, 107.30, 71.85, 69.84, 56.86, 49.83, 42.10, 41.34, 26.27, 26.19, 22.65, 21.87, 21.70, 21.28, 21.02, 20.81 ppm; ESI-HRMS: calcd. For  $\text{C}_{42}\text{H}_{43}\text{N}_3\text{O}_6\text{S}_2+\text{H}$  750.2672, found 750.2666.

Following the general procedure, treatment of **1g** (60 mg, 0.34 mmol) with **2** (29 mg, 0.34 mmol), **3c** (100 mg, 0.29 mmol) and 4-TFBA (54 mg, 0.29 mmol) in toluene (2 mL) at 110 °C for 1 h followed by

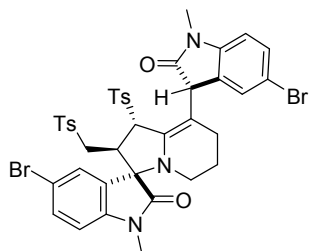

column chromatography afforded the product **4aa**:

**5-bromo-8'-(5-bromo-1-methyl-2-oxoindolin-3-yl)-1-methyl-1'-tosyl-2'-(tosylmethyl)-1',5',6',7'-tetrahydro-2'H-spiro[indoline-3,3'-indolizin]-2-one (**4aa**);** 72 mg; white solid;  $R_f$  (ethyl acetate : petroleum ether = 1:1) = 0.69; m.p. 190-191 °C; IR(KBr): 3048, 2981,

2838, 2355, 2328, 1713, 1682, 1593, 1495, 1434, 1359, 1318, 1284,

1221, 1187, 1154, 1144, 1084  $\text{cm}^{-1}$ ;  $^1\text{H}$  NMR (400 MHz, Chloroform-*d*)  $\delta$  = 7.76 (d,  $J$  = 7.6 Hz, 2H), 7.43 – 7.50 (m, 4H), 7.38 – 7.44 (m, 1H), 7.28 – 7.36 (m, 4H), 6.70 (dd,  $J$  = 8.0, 5.2 Hz, 2H), 5.84 (d,  $J$  = 2.0 Hz, 1H), 5.35 (s, 1H), 4.27 (d,  $J$  = 7.2 Hz, 1H), 3.98 (dd,  $J$  = 14.8, 2.4 Hz, 1H), 3.79 (dd,  $J$  = 14.8, 11.6 Hz, 1H), 3.23 (s, 3H), 3.21 (s, 3H), 2.67 (ddd,  $J$  = 11.8, 7.2, 2.2 Hz, 1H), 2.58 (s, 3H), 2.53 (s, 3H), 2.10 – 2.19 (m, 2H), 1.60 – 1.69 (m, 2H), 1.45 – 1.52 (m, 1H), 1.36 – 1.44 (m, 1H) ppm;  $^{13}\text{C}$  NMR (100 MHz,  $\text{CDCl}_3$ )  $\delta$  = 176.43, 173.57, 145.88, 144.96, 144.89, 143.28, 135.07, 134.33, 132.78, 131.08, 130.92, 130.56, 130.40, 130.05, 130.01, 129.78, 129.48, 128.83, 128.35, 128.25, 128.03, 127.20, 127.07, 115.11, 110.04, 109.11, 107.55, 76.68, 71.66, 69.70, 56.65, 49.76, 42.11, 41.44, 26.38, 26.34, 22.58, 21.96, 21.75, 20.72 ppm; ESI-HRMS: calcd. For  $\text{C}_{40}\text{H}_{37}\text{N}_3\text{O}_6\text{S}_2\text{Br}_2+\text{H}$  878.0569, found 878.0580.

Following the general procedure, treatment of **1b** (115 mg, 0.71 mmol) with **2** (61 mg, 0.71 mmol), **3d** (100 mg, 0.59 mmol) and 4-TFBA (113 mg, 0.59 mmol) in toluene (4 mL) at 110 °C for 1 h followed by column chromatography afforded the product **4ab**:

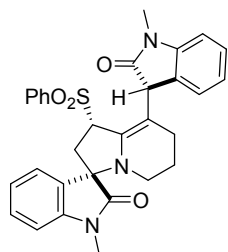

**1-methyl-8'-(1-methyl-2-oxoindolin-3-yl)-1'-(phenylsulfonyl)-1',5',6',7'-**

**tetrahydro-2'H-spiro[indoline-3,3'-indolizin]-2-one (4ab);** 118 mg; white

solid;  $R_f$  (ethyl acetate : petroleum ether = 1:1) = 0.51; m.p. 170-171 °C;

IR(KBr): 3043, 2931, 2838, 2353, 2321, 1713, 1613, 1494, 1470, 1446, 1372,

1346, 1308, 1258, 1204, 1132, 1085  $\text{cm}^{-1}$ ;  $^1\text{H}$  NMR (400 MHz, Chloroform-*d*)  $\delta$

= 8.56 (d,  $J$  = 7.2 Hz, 2H), 7.76 (t,  $J$  = 7.4 Hz, 1H), 7.69 (t,  $J$  = 7.4 Hz, 2H),

7.52 (d,  $J$  = 7.2 Hz, 1H), 7.29 (t,  $J$  = 8.0 Hz, 2H), 7.13 (t,  $J$  = 7.4 Hz, 1H), 6.98 (t,  $J$  = 7.4 Hz, 1H), 6.83

(d,  $J$  = 7.6 Hz, 1H), 6.77 (d,  $J$  = 7.6 Hz, 1H), 6.46 (d,  $J$  = 7.2 Hz, 1H), 5.53 (s, 1H), 4.95 (dd,  $J$  = 9.8,

6.6 Hz, 1H), 3.28 (s, 3H), 3.15 (s, 3H), 2.73 (dd,  $J$  = 14.8, 10.0 Hz, 1H), 2.51 (dd,  $J$  = 14.8, 6.8 Hz, 1H),

2.17 – 2.28 (m, 1H), 2.11 (td,  $J$  = 10.4, 3.2 Hz, 1H), 1.70 – 1.82 (m, 1H), 1.59 – 1.68 (m, 1H), 1.31 –

1.54 (m, 2H) ppm;  $^{13}\text{C}$  NMR (100 MHz,  $\text{CDCl}_3$ )  $\delta$  = 177.35, 177.32, 144.18, 144.13, 137.18, 134.80,

134.10, 131.33, 129.88, 128.95, 128.49, 127.75, 126.69, 125.97, 124.19, 123.67, 123.20, 122.85,

108.31, 108.23, 107.52, 69.33, 64.96, 49.80, 42.49, 35.38, 26.27, 25.95, 22.46, 20.92 ppm; ESI-HRMS:

calcd. For  $\text{C}_{31}\text{H}_{29}\text{N}_3\text{O}_4\text{S}+\text{H}$  540.1957, found 540.1965.

Following the general procedure, treatment of **1a** (125 mg, 0.71 mmol) with **2** (61 mg, 0.71 mmol), **3d** (100 mg, 0.59 mmol) and 4-TFBA (113 mg, 0.59 mmol) in toluene (4 mL) at 110 °C for 1 h followed

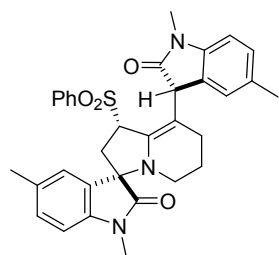

by column chromatography afforded the product **4ac**:

**8'-(1,5-dimethyl-2-oxoindolin-3-yl)-1,5-dimethyl-1'-(phenylsulfonyl)-**

**1',5',6',7'-tetrahydro-2'H-spiro[indoline-3,3'-indolizin]-2-one (4ac);**

119 mg; white solid;  $R_f$  (ethyl acetate : petroleum ether = 1:1) = 0.53; m.p.

170-171; IR(KBr): 3032, 2921, 2836, 2351, 2311, 1714, 1612, 1493, 1471,

1445, 1373, 1345, 1309, 1254, 1200, 1132, 1088  $\text{cm}^{-1}$ ;  $^1\text{H}$  NMR (400 MHz, Chloroform-*d*)  $\delta$  = 8.55 –

8.61 (m, 2H), 7.74 – 7.80 (m, 1H), 7.65 – 7.74 (m, 2H), 7.32 (s, 1H), 6.98 – 7.10 (m, 2H), 6.71 (d,  $J$  =

8.0 Hz, 1H), 6.65 (d,  $J$  = 8.0 Hz, 1H), 6.15 (s, 1H), 5.49 (s, 1H), 4.92 (dd,  $J$  = 10.4, 6.8 Hz, 1H), 3.26 (s,

3H), 3.12 (s, 3H), 2.73 (dd,  $J$  = 14.6, 10.2 Hz, 1H), 2.48 (dd,  $J$  = 14.8, 6.4 Hz, 1H), 2.40 (s, 3H), 2.26 (s,

3H), 2.09 – 2.24 (m, 2H), 1.70 – 1.82 (m, 1H), 1.60 – 1.70 (m, 1H), 1.35 – 1.55 (m, 2H) ppm;  $^{13}\text{C}$

NMR (100 MHz,  $\text{CDCl}_3$ )  $\delta$  = 177.36, 177.34, 141.87, 141.71, 137.10, 133.98, 132.72, 132.18, 131.41,

129.98, 128.96, 128.50, 127.96, 126.93, 125.08, 124.48, 108.02, 107.21, 69.39, 65.12, 49.89, 42.41,

35.42, 26.27, 25.94, 22.49, 21.25, 20.95, 20.94 ppm; ESI-HRMS: calcd. For  $\text{C}_{33}\text{H}_{33}\text{N}_3\text{O}_4\text{S}+\text{H}$  568.2270,

found 568.2272.

Following the general procedure, treatment of **1w** (68 mg, 0.37 mmol) with **2** (32 mg, 0.27 mmol), **3a** (100 mg, 0.31 mmol) and 4-TFBA (59 mg, 0.31 mmol) in toluene (2 mL) at 110 °C for 1.5 h followed by column chromatography afforded the product **5a**:

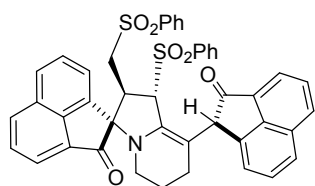

**8'-(2-oxo-1,2-dihydroacenaphthylen-1-yl)-1'-(phenylsulfonyl)-2'-((phenylsulfonyl)methyl)-1',5',6',7'-tetrahydro-2H,2'H-**

**spiro[acenaphthylene-1,3'-indolizin]-2-one (5a);** 79 mg; yellow solid;

$R_f$  (ethyl acetate : petroleum ether = 1:1) = 0.44; m.p. 214-215 °C;

IR(KBr): 3054, 2929, 2839, 2353, 2321, 1716, 1605, 1583, 1494, 1464,

1434, 1310, 1276, 1196, 1164, 1138, 1083  $\text{cm}^{-1}$ ;  $^1\text{H}$  NMR (400 MHz, Chloroform-*d*)  $\delta$  = 8.39 (d,  $J$  = 7.6 Hz, 2H), 8.14 (dd,  $J$  = 11.2, 8.0 Hz, 2H), 7.90 – 8.02 (m, 3H), 7.86 (d,  $J$  = 7.6 Hz, 2H), 7.79 – 7.84 (m, 1H), 7.67 – 7.79 (m, 5H), 7.59 – 7.67 (m, 2H), 7.44 – 7.55 (m, 4H), 6.68 (d,  $J$  = 6.8 Hz, 1H), 5.78 (s, 1H), 4.63 (d,  $J$  = 7.6 Hz, 1H), 4.05 (dd,  $J$  = 14.2, 1.8 Hz, 1H), 3.58 (dd,  $J$  = 14.2, 11.4 Hz, 1H), 3.44 – 3.52 (m, 1H), 2.07 (t,  $J$  = 5.4 Hz, 2H), 1.56 – 1.80 (m, 2H), 1.14 – 1.35 (m, 2H) ppm;  $^{13}\text{C}$  NMR (100 MHz,  $\text{CDCl}_3$ )  $\delta$  = 205.76, 205.16, 143.58, 141.47, 138.36, 137.80, 135.29, 134.48, 133.88, 133.18, 133.06, 131.46, 130.83, 130.81, 130.17, 129.69, 128.43, 128.36, 128.04, 127.69, 127.61, 127.40, 125.49, 123.33, 120.60, 120.46, 120.14, 120.08, 109.82, 74.75, 69.12, 55.77, 55.13, 41.88, 40.37, 22.40, 20.19 ppm;  $\text{C}_{44}\text{H}_{33}\text{NO}_6\text{S}_2+\text{H}$  736.1828, found 736.1816.

Following the general procedure, treatment of **1w** (56 mg, 0.31 mmol) with **2** (26 mg, 0.31 mmol), **3b** (100 mg, 0.26 mmol) and 4-TFBA (49 mg, 0.26 mmol) in toluene (2 mL) at 110 °C for 1.5 h followed

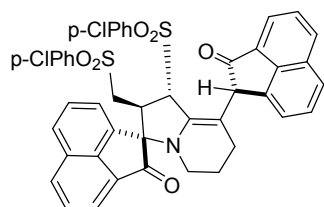

by column chromatography afforded the product **5b**:

**1'-((4-chlorophenyl)sulfonyl)-2'-(((4-**

**chlorophenyl)sulfonyl)methyl)-8'-(2-oxo-1,2-**

**dihydroacenaphthylen-1-yl)-1',5',6',7'-tetrahydro-2H,2'H-**

**spiro[acenaphthylene-1,3'-indolizin]-2-one (5b);** 97 mg; yellow

solid;  $R_f$  (ethyl acetate : petroleum ether = 1:1) = 0.44; m.p. 200-201°C; IR(KBr): 3086, 2948, 2837,

2353, 2321, 1713, 1604, 1581, 1494, 1477, 1464, 1433, 1396, 1365, 1316, 1178, 1144, 1089  $\text{cm}^{-1}$ ;  $^1\text{H}$

NMR (400 MHz, Chloroform-*d*)  $\delta$  = 8.46 (d,  $J$  = 8.4 Hz, 2H), 8.15 (dd,  $J$  = 14.4, 8.0 Hz, 2H), 7.89 –

8.01 (m, 3H), 7.83 – 7.89 (m, 2H), 7.64 – 7.81 (m, 6H), 7.42 (s, 4H), 6.80 (d,  $J$  = 6.8 Hz, 1H), 5.74 (s,

1H), 4.67 (d,  $J$  = 7.2 Hz, 1H), 4.00 (d,  $J$  = 12.4 Hz, 1H), 3.40 – 3.63 (m, 2H), 1.95 – 2.24 (m, 2H), 1.55

– 1.74 (m, 2H), 1.08 – 1.43 (m, 2H) ppm;  $^{13}\text{C}$  NMR (100 MHz,  $\text{CDCl}_3$ )  $\delta$  = 206.13, 205.69, 144.12,

142.13, 141.53, 140.44, 138.78, 137.08, 135.43, 134.94, 134.43, 132.95, 132.67, 132.51, 131.85,

131.50, 130.82, 130.42, 129.53, 129.26, 129.02, 128.40, 128.05, 126.30, 124.03, 121.30, 121.15,

120.77, 111.04, 75.36, 69.75, 56.44, 55.72, 42.60, 41.17, 22.99, 20.88 ppm; ESI-HRMS: calcd. For

$\text{C}_{44}\text{H}_{31}\text{NO}_6\text{S}_2\text{Cl}_2+\text{H}$  804.1048, found 804.1034.



Following the general procedure, treatment of **1w** (62 mg, 0.34 mmol) with **2** (29 mg, 0.34 mmol), **3c** (100 mg, 0.29 mmol) and 4-TFBA (54 mg, 0.29 mmol) in toluene (2 mL) at 110 °C for 2 h followed by column chromatography afforded the product **5c**:

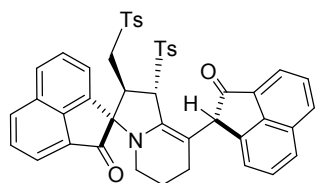

**8'-(2-oxo-1,2-dihydroacenaphthyl-1-yl)-1'-tosyl-2'-(tosylmethyl)-1',5',6',7'-tetrahydro-2H,2'H-spiro[acenaphthylene-1,3'-indolizin]-2-one (**5c**);**

96 mg; yellow solid;  $R_f$  (ethyl acetate : petroleum ether = 1:1) = 0.45; m.p. 190-191 °C; IR(KBr): 3043, 2946, 2838, 2353, 2320, 1722, 1682, 1594, 1574, 1487, 1434, 1416, 1318, 1305, 1218, 1196, 1135, 1085  $\text{cm}^{-1}$ ;  $^1\text{H NMR}$  (400 MHz, Chloroform-*d*)  $\delta$  = 8.23 (d,  $J$  = 8.0 Hz, 2H), 8.13 (dd,  $J$  = 11.6, 8.0 Hz, 2H), 7.93 – 8.02 (m, 2H), 7.92 (s, 1H), 7.86 (dd,  $J$  = 7.6, 2.8 Hz, 2H), 7.68 – 7.79 (m, 3H), 7.64 (dd,  $J$  = 8.4, 6.8 Hz, 1H), 7.47 (d,  $J$  = 8.0 Hz, 2H), 7.34 – 7.41 (m, 2H), 7.28 (d,  $J$  = 8.0 Hz, 2H), 6.72 (d,  $J$  = 6.8 Hz, 1H), 5.79 (s, 1H), 4.60 (d,  $J$  = 7.6 Hz, 1H), 4.01 (dd,  $J$  = 14.0, 1.2 Hz, 1H), 3.42 – 3.60 (m, 2H), 2.57 (s, 3H), 2.46 (s, 3H), 2.03 – 2.12 (m, 2H), 1.69-1.81 (m, 1H), 1.59-1.68 (m, 1H), 1.27-1.41 (m, 2H) ppm;  $^{13}\text{C NMR}$  (100 MHz,  $\text{CDCl}_3$ )  $\delta$  = 206.42, 205.72, 145.44, 144.61, 144.18, 142.05, 139.07, 138.72, 136.07, 135.52, 135.20, 134.54, 132.43, 132.11, 131.47, 131.35, 131.10, 130.88, 130.77, 130.04, 129.99, 129.50, 129.25, 129.03, 128.32, 128.24, 128.17, 128.01, 127.97, 126.02, 123.88, 121.15, 121.01, 120.73, 110.22, 75.41, 69.74, 57.85, 56.51, 55.74, 42.49, 41.03, 23.00, 21.97, 21.64, 20.86 ppm; ESI-HRMS: calcd. For  $\text{C}_{46}\text{H}_{37}\text{NO}_6\text{S}_2+\text{H}$  764.2141, found 764.2178.

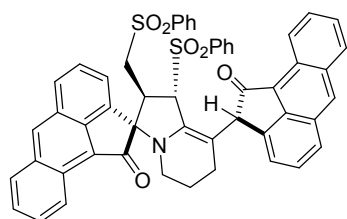

Following the general procedure, treatment of **1x** (86 mg, 0.37 mmol) with **2** (32 mg, 0.27 mmol), **3a** (100 mg, 0.31 mmol) and 4-TFBA (59 mg, 0.31 mmol) in toluene (2 mL) at 110 °C for 1.5 h followed by column chromatography afforded the product **5d**:

**8'-(1-oxo-1,2-dihydroaceanthrylen-2-yl)-1'-(phenylsulfonyl)-2'-(phenylsulfonylmethyl)-1',5',6',7'-tetrahydro-1H,2'H-spiro[aceanthrylene-2,3'-indolizin]-1-one (**5d**);**

113 mg; yellow solid;  $R_f$  (ethyl acetate : petroleum ether = 1:1) = 0.53; m.p. 227-228 °C; IR(KBr): 3048, 2924, 2839, 2403, 2307, 1691, 1626, 1595, 1579, 1532, 1458, 1403, 1318, 1305, 1221, 1154, 1143, 1085  $\text{cm}^{-1}$ ;  $^1\text{H NMR}$  (400 MHz, Chloroform-*d*)  $\delta$  = 9.27 (d,  $J$  = 8.4 Hz, 1H), 9.19 (d,  $J$  = 8.8 Hz, 1H), 8.73 (d,  $J$  = 9.6 Hz, 2H), 8.39 – 8.49 (m, 2H), 8.17 (dd,  $J$  = 8.4, 5.2 Hz, 2H), 8.04 (d,  $J$  = 8.4 Hz, 1H), 7.99 (dd,  $J$  = 7.6, 6.0 Hz, 2H), 7.71 – 7.88 (m, 6H), 7.56 – 7.68 (m, 4H), 7.44 – 7.53 (m, 4H), 6.67 (d,  $J$  = 6.4 Hz, 1H), 5.94 (s, 1H), 4.77 (d,  $J$  = 8.0 Hz, 1H), 4.10 (dd,  $J$  = 14.4, 1.2 Hz, 1H), 3.69 (dd,  $J$  = 14.4, 11.2 Hz, 1H), 3.49 – 3.59 (m, 1H), 2.08 – 2.21 (m, 2H), 1.74 – 1.86 (m, 1H), 1.54 – 1.68 (m, 1H), 1.20 – 1.35 (m, 2H) ppm;  $^{13}\text{C NMR}$  (100 MHz,  $\text{CDCl}_3$ )  $\delta$  = 205.76, 205.73, 146.41, 144.20, 139.27, 138.48, 136.36, 135.36, 134.41, 133.89, 133.73, 133.51, 133.48, 133.40, 132.28, 131.49, 130.44, 129.51, 129.19, 128.86, 128.64, 128.46, 128.27, 128.09, 128.01, 127.66, 127.55,

127.23, 126.56, 126.26, 125.42, 125.38, 125.09, 124.77, 124.65, 124.12, 120.23, 120.17, 110.32, 75.54, 69.86, 56.49, 55.99, 42.47, 40.89, 22.87, 20.85 ppm; ESI-HRMS: calcd. For C<sub>52</sub>H<sub>37</sub>NO<sub>6</sub>S<sub>2</sub>+H 836.2141, found 836.2114.

Following the general procedure, treatment of **1x** (71 mg, 0.31 mmol) with **2** (26 mg, 0.31 mmol), **3b** (100 mg, 0.26 mmol) and 4-TFBA (49 mg, 0.26 mmol) in toluene (2 mL) at 110 °C for 1.5 h followed by column chromatography afforded the product **5e**:

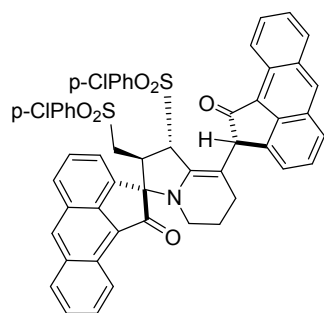

**1'-((4-chlorophenyl)sulfonyl)-2'-(((4-chlorophenyl)sulfonyl)methyl)-8'-(1-oxo-1,2-dihydroaceanthrylen-2-yl)-1',5',6',7'-tetrahydro-1H,2'H-spiro[aceanthrylene-2,3'-indolizin]-1-one (**5e**):** 99 mg; yellow solid; *R<sub>f</sub>* (ethyl acetate : petroleum ether = 1:1) = 0.52; m.p. 217-218 °C; IR(KBr): 3045, 2911, 2839, 2397, 2307, 1710, 1624, 1592, 1570, 1530, 1448, 1413, 1315, 1305, 1211, 1162, 1144, 1080 cm<sup>-1</sup>; <sup>1</sup>H NMR (400 MHz, Chloroform-*d*) δ = 9.25 (d, *J* = 8.4 Hz, 1H),

9.16 (d, *J* = 8.4 Hz, 1H), 8.74 (d, *J* = 12.0 Hz, 2H), 8.55 (d, *J* = 8.4 Hz, 2H), 8.18 (d, *J* = 8.4 Hz, 2H), 8.06 (d, *J* = 8.8 Hz, 1H), 7.98 (dd, *J* = 10.8, 7.6 Hz, 2H), 7.73 – 7.88 (m, 5H), 7.58 – 7.82 (m, 3H), 7.35 – 7.42 (m, 2H), 7.31 – 7.34 (m, 2H), 6.80 (d, *J* = 6.6 Hz, 1H), 5.90 (s, 1H), 4.81 (d, *J* = 7.6 Hz, 1H), 4.05 (d, *J* = 14.0 Hz, 1H), 3.52 – 3.72 (m, 2H), 2.12 – 2.22 (m, 2H), 1.72 – 1.83 (m, 1H), 1.58 – 1.70 (m, 1H), 1.25 – 1.32 (m, 2H) ppm; <sup>13</sup>C NMR (100 MHz, CDCl<sub>3</sub>) δ = 205.75, 205.55, 146.33, 144.30, 141.46, 140.26, 139.11, 137.09, 135.84, 135.20, 133.98, 133.50, 133.45, 133.03, 132.55, 132.43, 129.71, 129.64, 129.43, 129.24, 129.11, 129.03, 128.99, 128.48, 128.26, 128.17, 128.03, 127.54, 127.38, 126.70, 126.48, 126.35, 124.87, 124.76, 124.57, 124.23, 120.36, 120.27, 110.95, 75.52, 69.79, 56.47, 55.96, 42.58, 41.08, 22.87, 20.95 ppm; ESI-HRMS: calcd. For C<sub>52</sub>H<sub>35</sub>NO<sub>6</sub>S<sub>2</sub>Cl<sub>2</sub>+H 904.1361, found 904.1328.

Following the general procedure, treatment of **1x** (80 mg, 0.34 mmol) with **2** (29 mg, 0.34 mmol), **3c** (100 mg, 0.29 mmol) and 4-TFBA (54 mg, 0.29 mmol) in toluene (2 mL) at 110 °C for 2 h followed by column chromatography afforded the product **5f**:

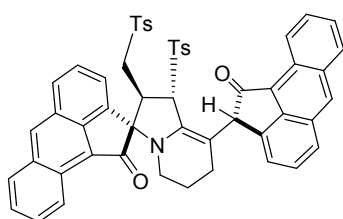

**8'-(1-oxo-1,2-dihydroaceanthrylen-2-yl)-1'-tosyl-2'-(tosylmethyl)-1',5',6',7'-tetrahydro-1H,2'H-spiro[aceanthrylene-2,3'-indolizin]-1-one (**5f**):** 123 mg; yellow solid; *R<sub>f</sub>* (ethyl acetate : petroleum ether = 1:1) = 0.50; m.p. 245-246 °C; IR(KBr): 3044, 2901, 2811, 2388, 2317, 1716, 1614, 1591, 1561, 1524, 1449, 1411, 1324, 1311, 1231, 1154,

1114, 1076 cm<sup>-1</sup>; <sup>1</sup>H NMR (400 MHz, Chloroform-*d*) δ = 9.26 (d, *J* = 8.8 Hz, 1H), 9.18 (d, *J* = 8.8 Hz, 1H), 8.72 (d, *J* = 11.6 Hz, 2H), 8.29 (d, *J* = 7.6 Hz, 2H), 8.12 – 8.20 (m, 2H), 8.04 (d, *J* = 8.8 Hz, 1H), 7.95 – 8.01 (m, 2H), 7.77 – 7.84 (m, 2H), 7.74 (t, *J* = 7.8 Hz, 1H), 7.57 – 7.68 (m, 3H), 7.52 (d, *J* = 8.0

Hz, 2H), 7.35 (d,  $J = 8.0$  Hz, 2H), 7.22 (d,  $J = 8.0$  Hz, 2H), 6.70 (d,  $J = 6.8$  Hz, 1H), 5.94 (s, 1H), 4.75 (d,  $J = 8.0$  Hz, 1H), 4.00 – 4.13 (m, 1H), 3.70 (dd,  $J = 14.8, 11.6$  Hz, 1H), 3.41 – 3.58 (m, 2H), 3.09 (s, 1H), 2.60 (s, 3H), 2.41 (s, 3H), 2.11 – 2.19 (m, 2H), 1.74 – 1.84 (m, 1H), 1.52 – 1.69 (m, 1H) ppm;  $^{13}\text{C}$  NMR (100 MHz,  $\text{CDCl}_3$ )  $\delta = 205.80, 205.75, 146.38, 144.45, 144.18, 139.39, 136.53, 135.57, 133.62, 133.46, 133.41, 132.22, 131.54, 131.19, 129.49, 129.46, 129.39, 129.26, 129.18, 128.81, 128.47, 128.29, 128.27, 128.09, 128.02, 127.71, 127.54, 127.23, 126.54, 126.24, 126.20, 125.11, 124.80, 124.66, 124.08, 120.21, 110.14, 75.58, 69.85, 56.61, 55.99, 42.48, 40.95, 22.89, 21.98, 21.57, 20.92$  ppm; ESI-HRMS: calcd. For  $\text{C}_{54}\text{H}_{41}\text{NO}_6\text{S}_2 + \text{H}$  864.2454, found 864.2438.

Following the general procedure, treatment of **1b** (114 mg, 0.71 mmol) with **2** (61 mg, 0.71 mmol), **3f** (100 mg, 0.59 mmol) and 4-TFBA (113 mg, 0.59 mmol) in toluene (4 mL) at 110 °C for 2 h followed by column chromatography afforded the product **6** and **7**:

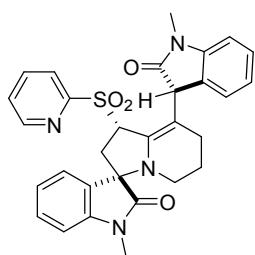

**1-methyl-8'-(1-methyl-2-oxoindolin-3-yl)-1'-(pyridin-2-ylsulfonyl)-**

**1',5',6',7'-tetrahydro-2'H-spiro[indoline-3,3'-indolizin]-2-one (6):** 46 mg; white solid;  $R_f$  (ethyl acetate : petroleum ether = 1:1) = 0.38; m.p. 170-171 °C; IR(KBr): 3035, 2928, 2833, 2348, 2311, 1714, 1611, 1492, 1469, 1444, 1377, 1349, 1306, 1251, 1210, 1122, 1087  $\text{cm}^{-1}$ ;  $^1\text{H}$  NMR (400 MHz, Chloroform-*d*)  $\delta = 9.15$  (d,  $J = 8.0$  Hz, 1H), 8.89 (d,  $J = 4.8$  Hz, 1H), 8.07 (td,  $J = 7.6, 2.0$  Hz, 1H), 7.59 – 7.64 (m, 1H), 7.54 (d,  $J = 7.2$  Hz, 1H), 7.27 – 7.34 (m, 2H), 7.24 (d,  $J = 7.6$  Hz, 1H), 7.07 – 7.15 (m, 2H), 6.80 (t,  $J = 8.4$  Hz, 2H), 5.38 (s, 1H), 5.02 (dd,  $J = 10.0, 6.4$  Hz, 1H), 3.32 (dd,  $J = 14.4, 6.4$  Hz, 1H), 3.26 (s, 3H), 3.16 (s, 3H), 2.74 (dd,  $J = 14.8, 10.0$  Hz, 1H), 2.16 – 2.24 (m, 1H), 2.06 – 2.14 (m, 1H), 1.60 – 1.68 (m, 1H), 1.49 – 1.58 (m, 1H), 1.35 – 1.45 (m, 1H), 0.99 – 1.15 (m, 1H) ppm;  $^{13}\text{C}$  NMR (100 MHz,  $\text{CDCl}_3$ )  $\delta = 177.27, 177.10, 154.83, 149.22, 144.18, 144.04, 137.53, 136.90, 129.91, 128.90, 128.15, 127.78, 127.61, 126.56, 124.78, 124.23, 123.26, 122.97, 108.38, 108.18, 107.51, 69.68, 64.68, 49.68, 42.33, 34.72, 26.25, 25.93, 22.29, 20.96$  ppm; ESI-HRMS: calcd. For  $\text{C}_{30}\text{H}_{28}\text{N}_4\text{O}_4\text{S} + \text{H}$  541.1910, found 541.1932.

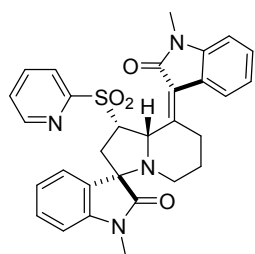

**(Z)-1-methyl-8'-(1-methyl-2-oxoindolin-3-ylidene)-1'-(pyridin-2-**

**ylsulfonyl)-1',5',6',7',8',8a'-hexahydro-2'H-spiro[indoline-3,3'-indolizin]-2-one (7):** 92 mg; yellow solid;  $R_f$  (ethyl acetate : petroleum ether = 1:1) = 0.32; m.p. 165-166 °C; IR(KBr): 2924, 2854, 2361, 2343, 1734, 1717, 1686, 1654, 1611, 1472, 1459, 1375, 1319, 1261, 1164, 1090  $\text{cm}^{-1}$ ;  $^1\text{H}$  NMR (400 MHz, Chloroform-*d*)  $\delta = 7.92$  (d,  $J = 7.8$  Hz, 1H), 7.81 (d,  $J = 4.8$  Hz, 1H),

7.77 (d,  $J = 7.2$  Hz, 1H), 7.67 (td,  $J = 7.8, 1.6$  Hz, 1H), 7.36 (td,  $J = 7.8, 1.2$  Hz, 1H), 7.31 (d,  $J = 7.6$  Hz, 1H), 7.17 – 7.25 (m, 2H), 7.06 (td,  $J = 7.6, 1.2$  Hz, 1H), 7.00 (ddd,  $J = 7.6, 4.6, 1.2$  Hz, 1H), 6.83 (d,  $J = 7.8$  Hz, 1H), 6.59 (dd,  $J = 7.8, 1.2$  Hz, 1H), 5.40 – 5.45 (m, 1H), 5.24 – 5.32 (m, 1H), 4.38 (ddd,

$J = 12.8, 5.6, 1.6$  Hz, 1H), 3.24 (dd,  $J = 15.4, 3.6$  Hz, 1H), 3.18 (s, 3H), 3.05 (s, 3H), 2.96 – 3.04 (m, 1H), 2.92 (dd,  $J = 15.4, 9.8$  Hz, 1H), 2.49 (td,  $J = 11.2, 3.6$  Hz, 1H), 2.22 – 2.33 (m, 1H), 2.02 – 2.15 (m, 1H), 1.33 – 1.49 (m, 1H), ppm;  $^{13}\text{C}$  NMR (100 MHz,  $\text{CDCl}_3$ )  $\delta = 178.48, 166.65, 157.15, 149.22, 143.99, 141.54, 136.87, 129.61, 128.49, 128.30, 125.95, 125.34, 124.06, 123.81, 123.37, 122.98, 122.37, 122.20, 121.21, 107.92, 107.09, 66.53, 62.84, 56.31, 40.06, 33.94, 25.78, 25.45, 23.29, 22.67$  ppm; ESI-HRMS: calcd. For  $\text{C}_{30}\text{H}_{28}\text{N}_4\text{O}_4\text{S}+\text{H}$  541.1910, found 541.1917.

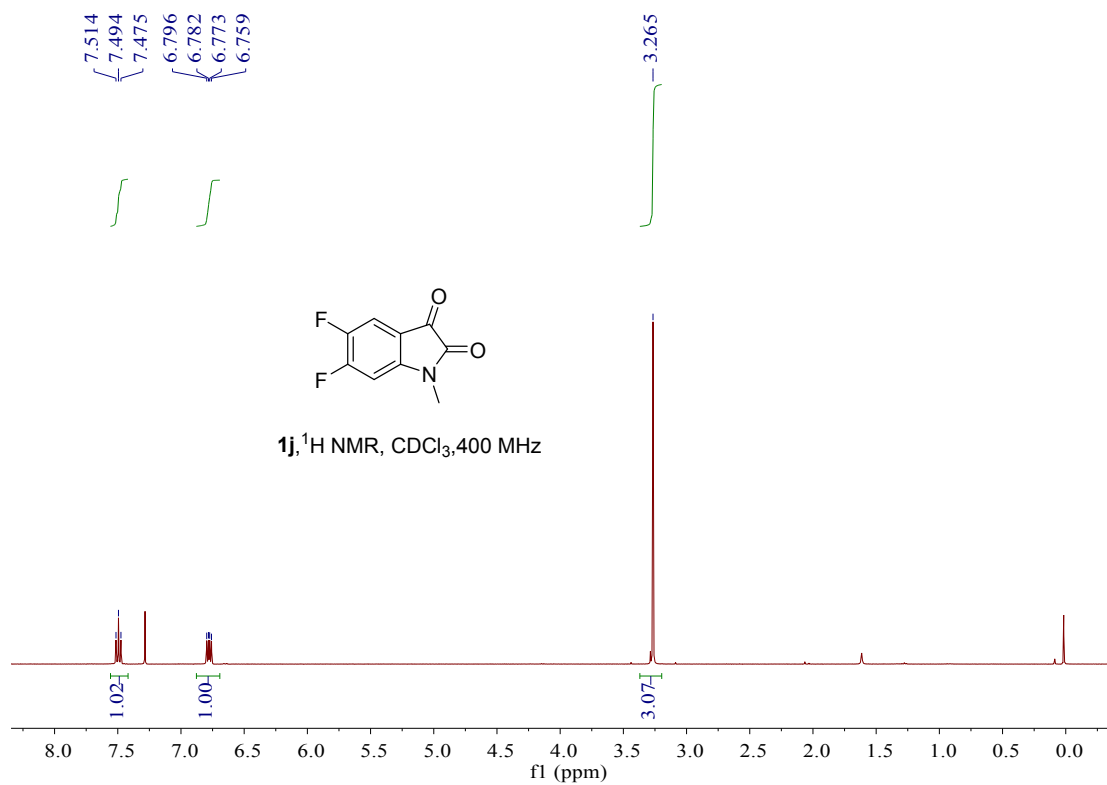

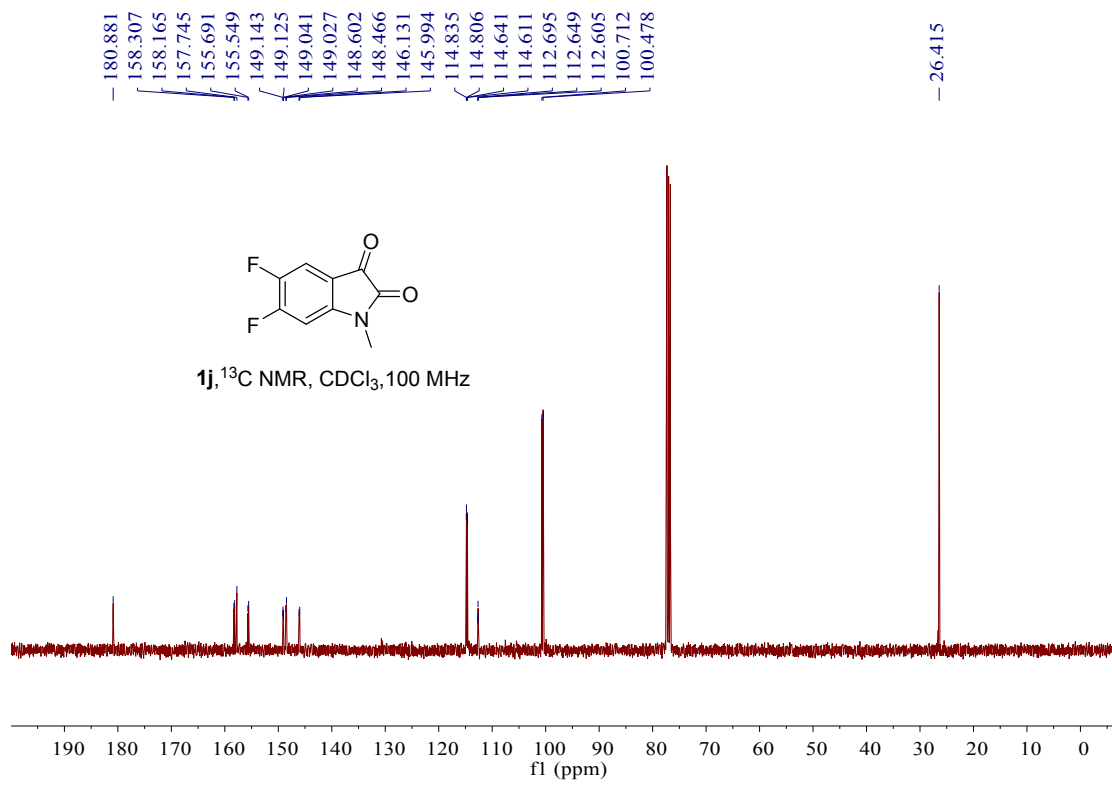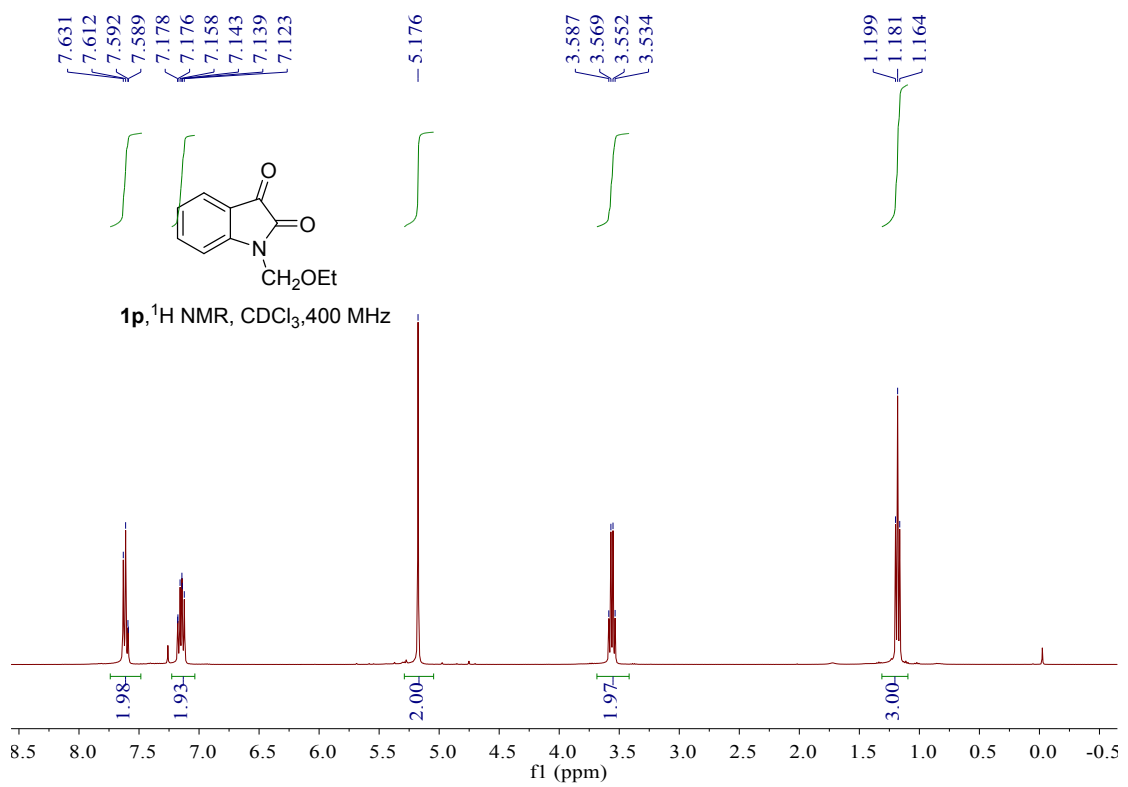

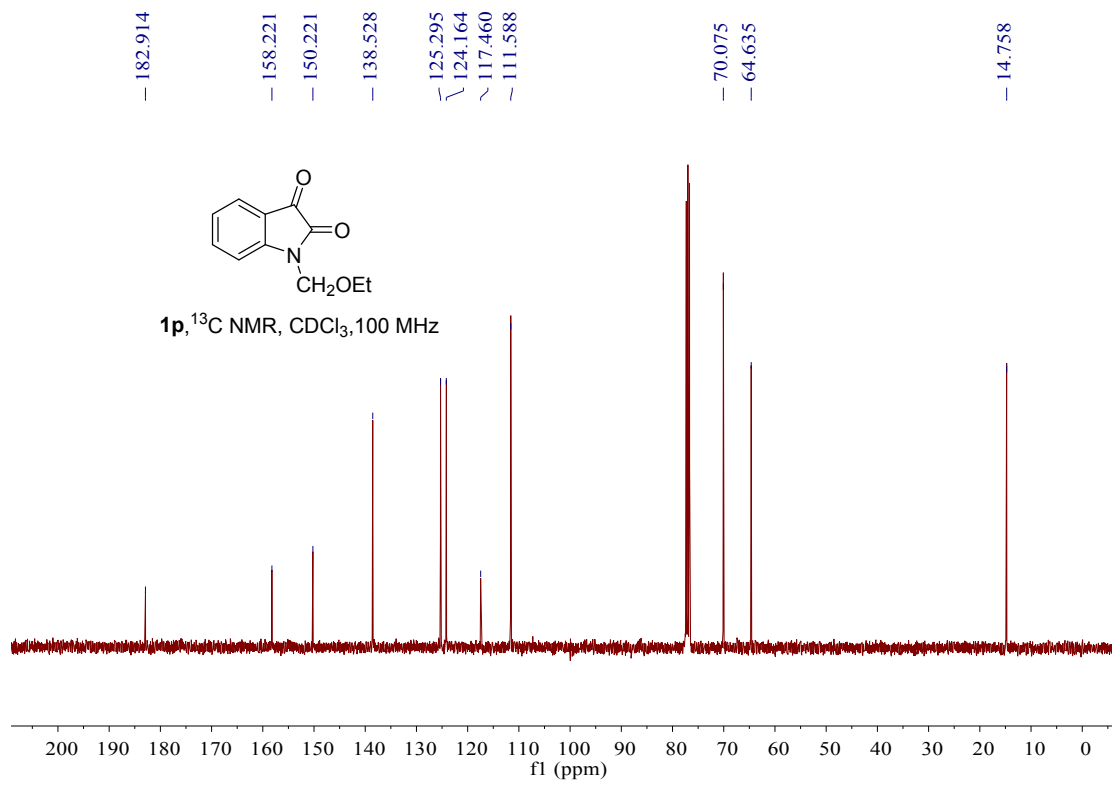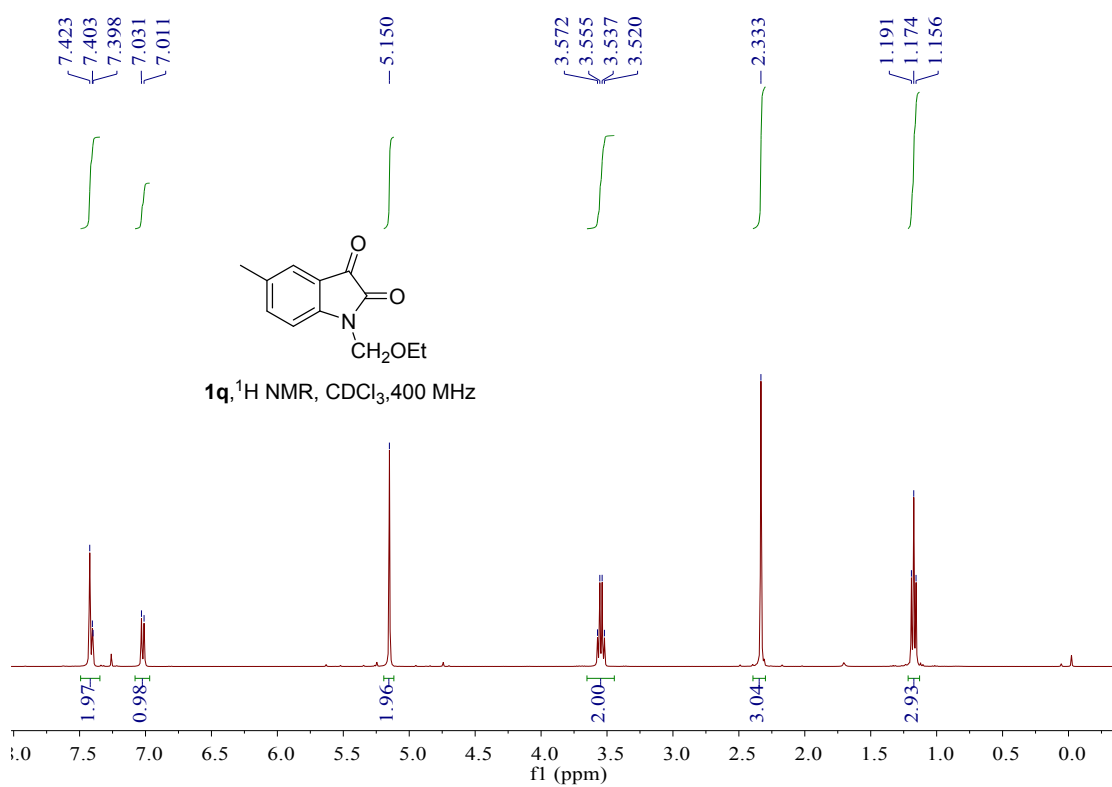

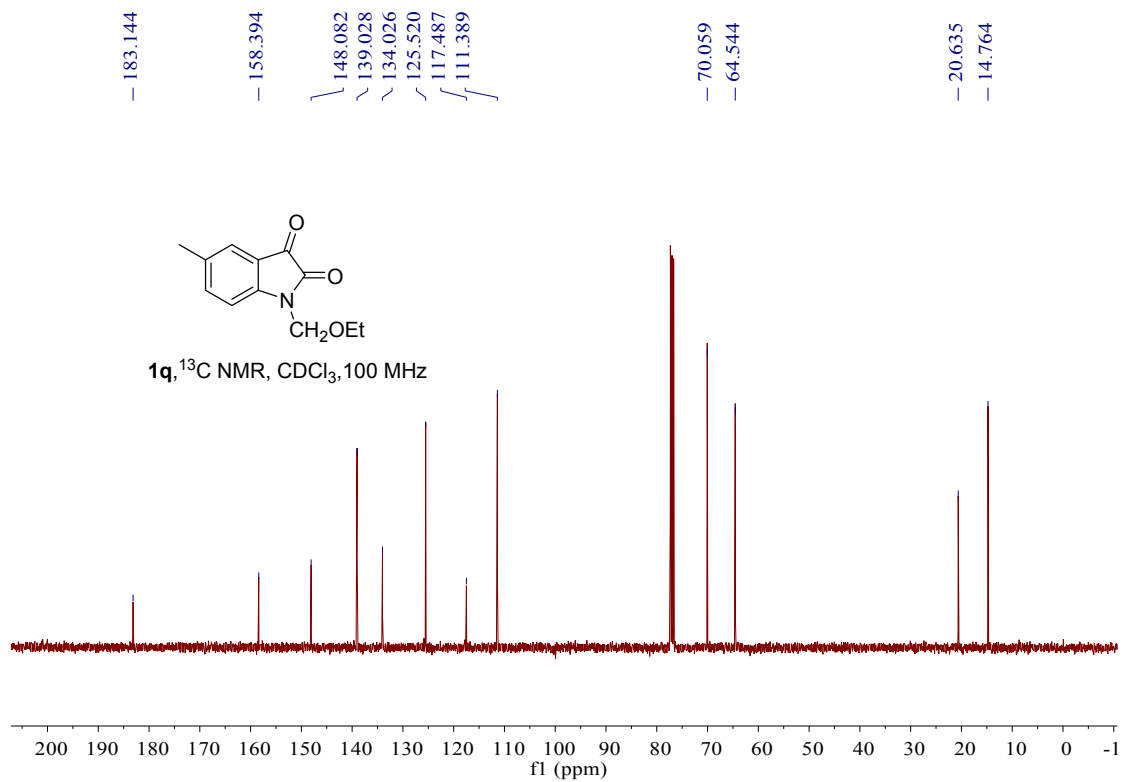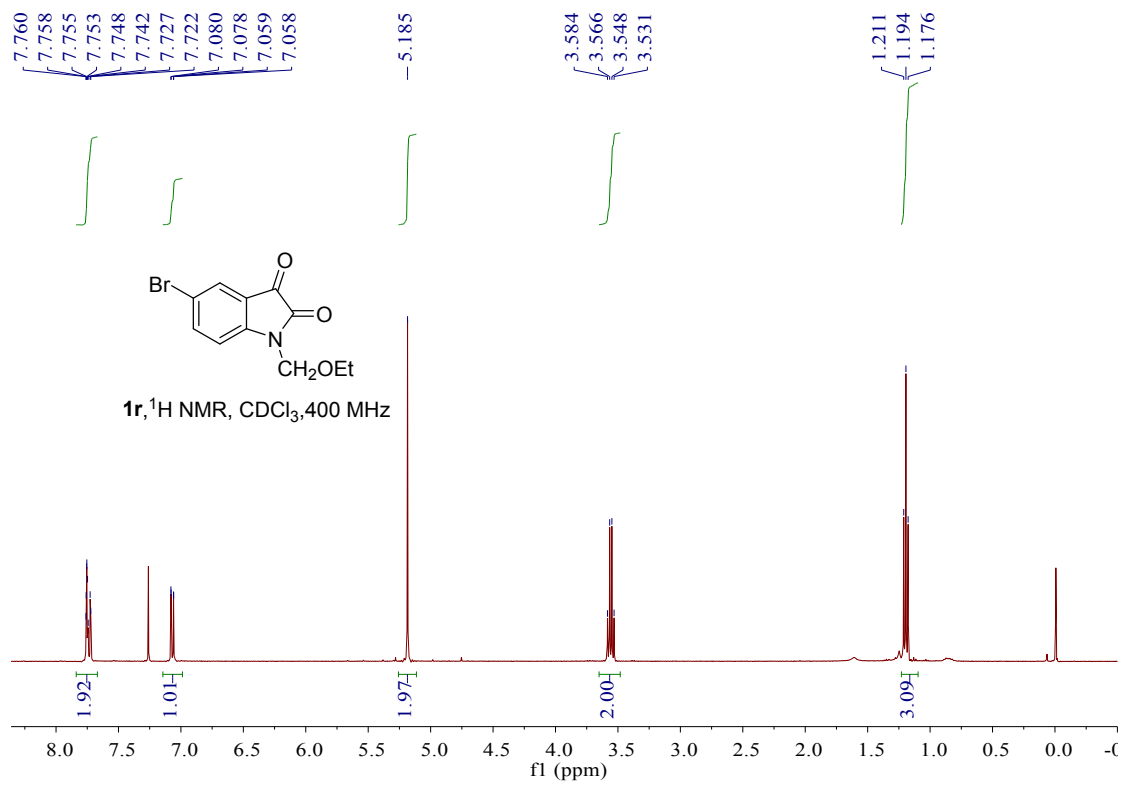

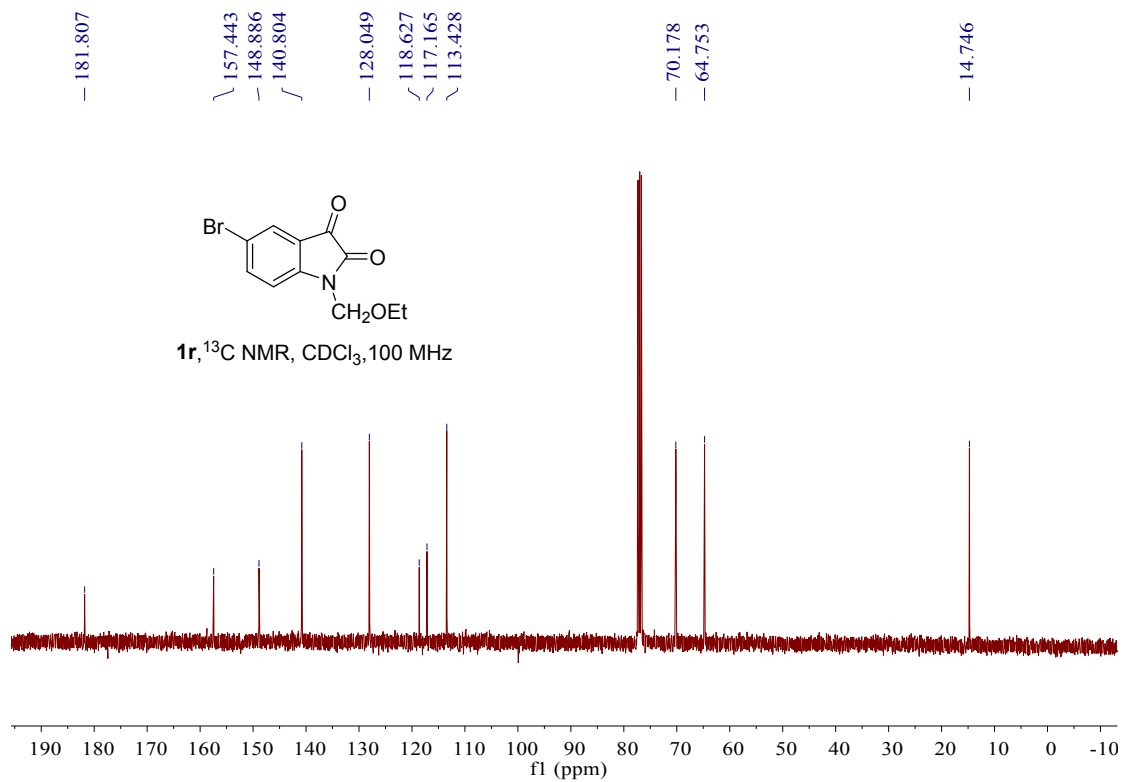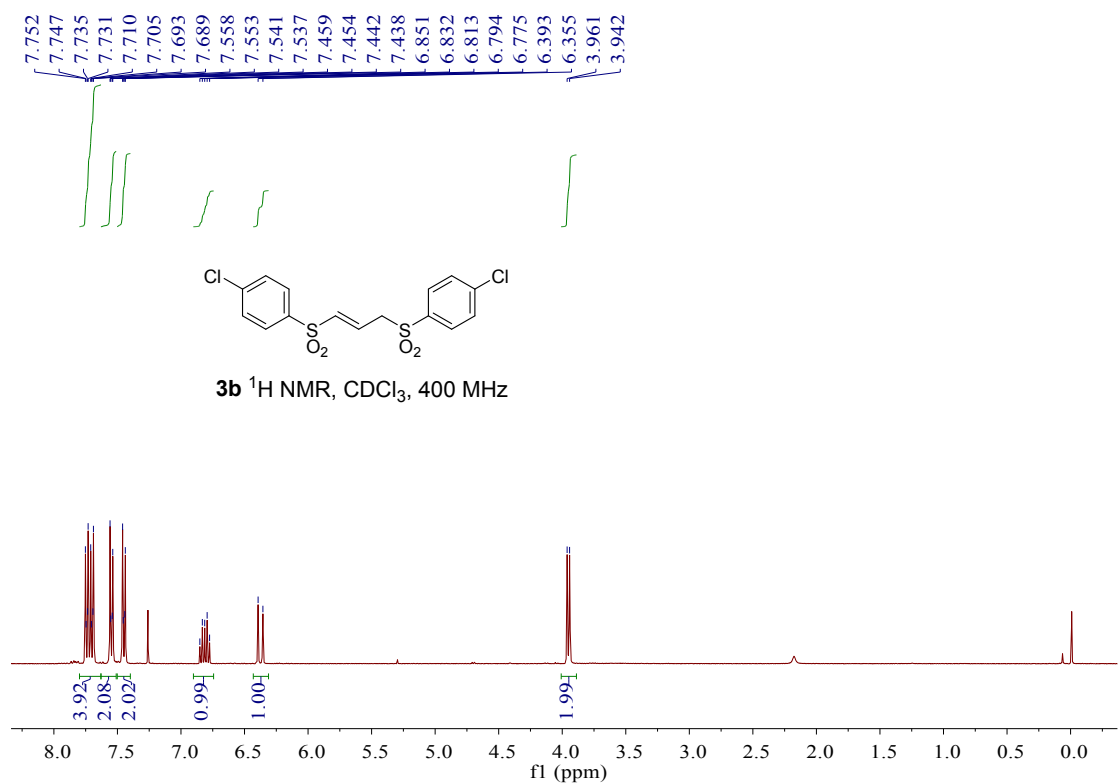



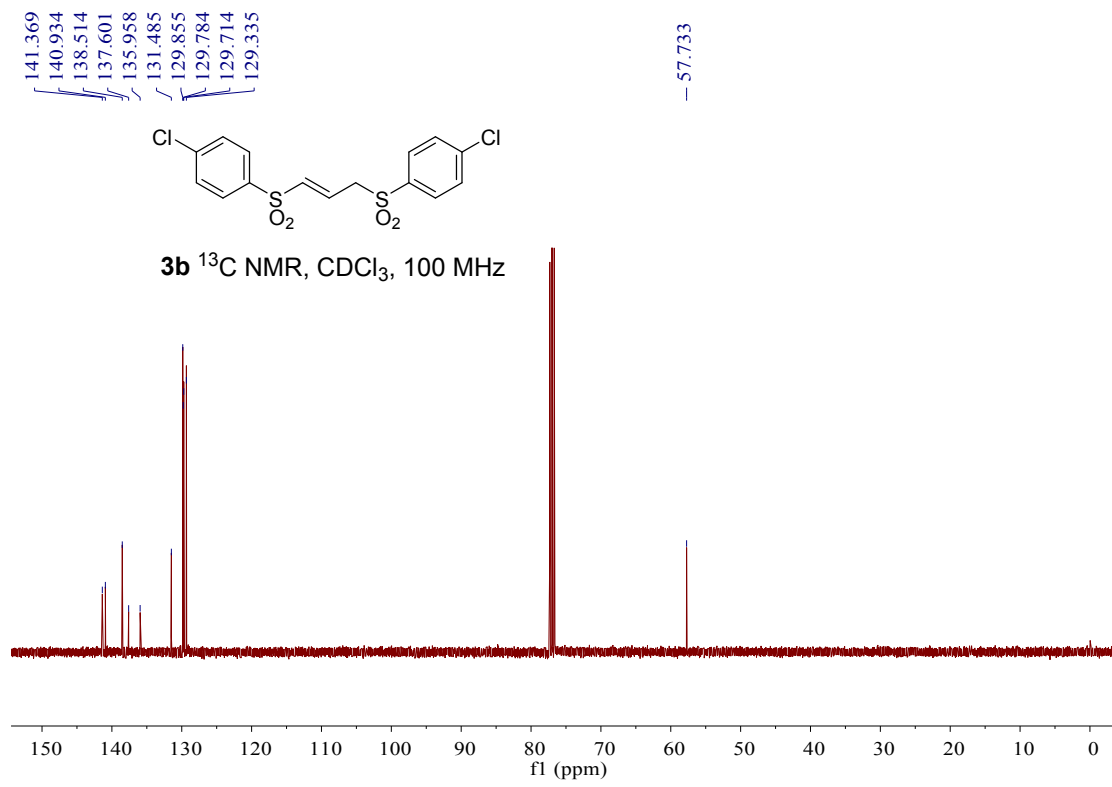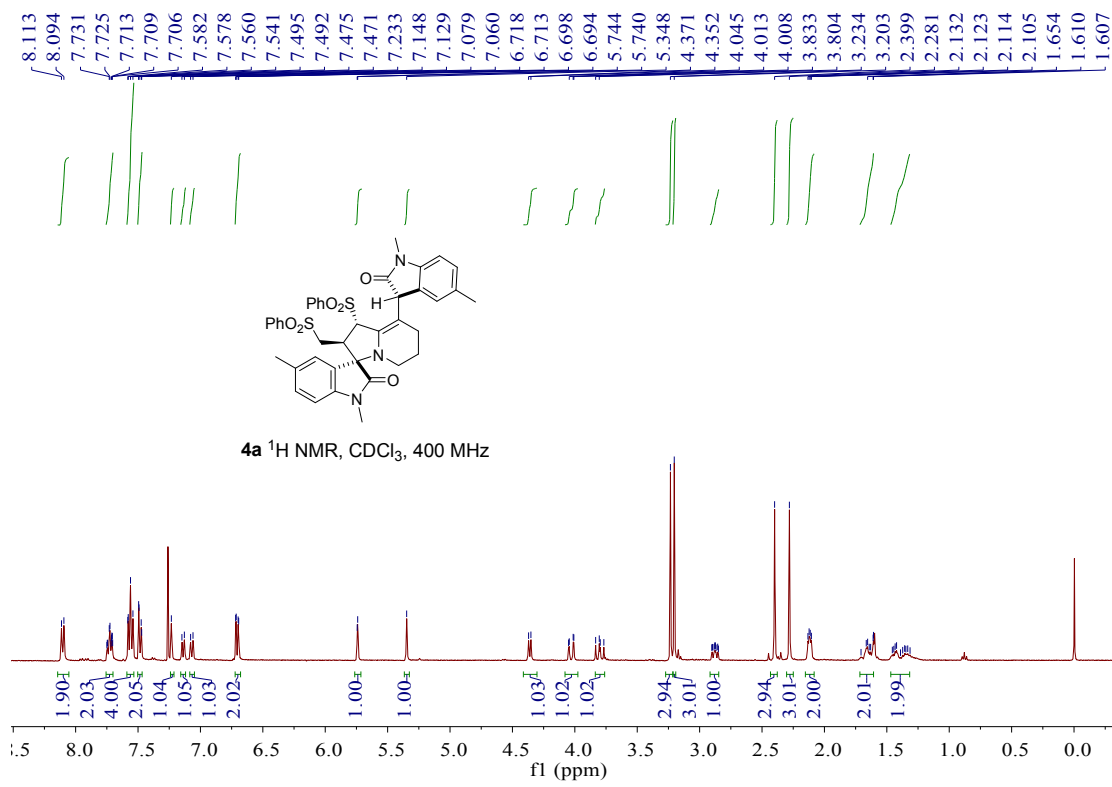

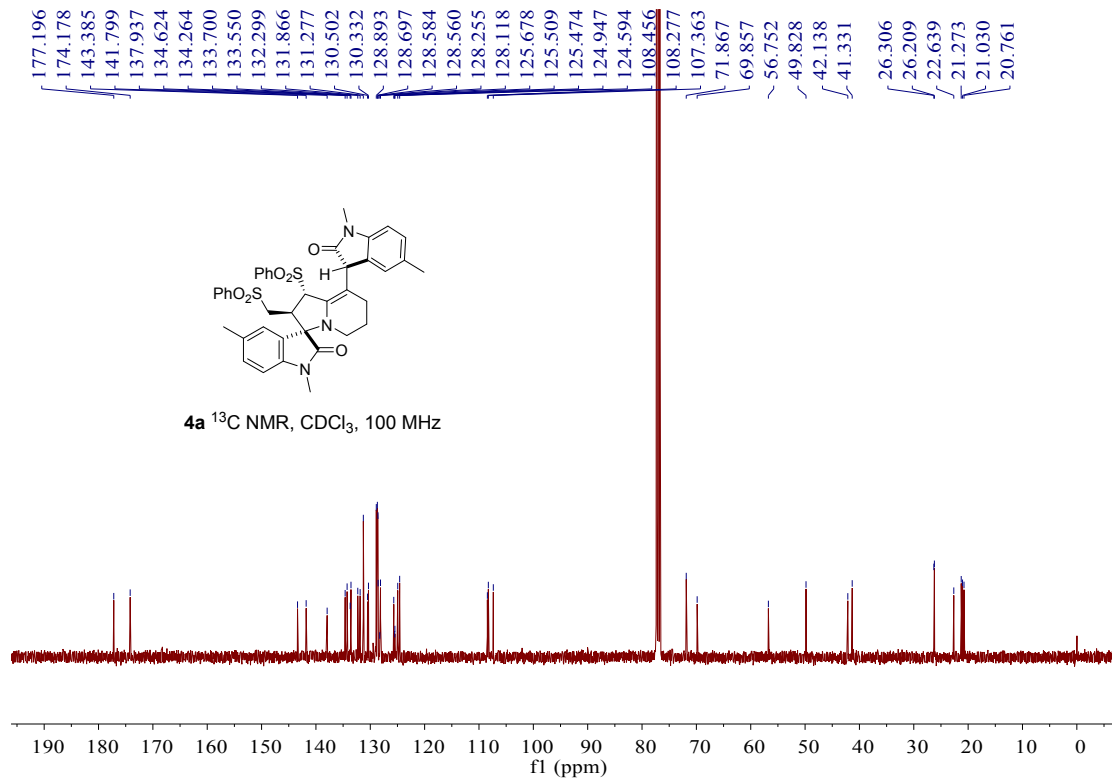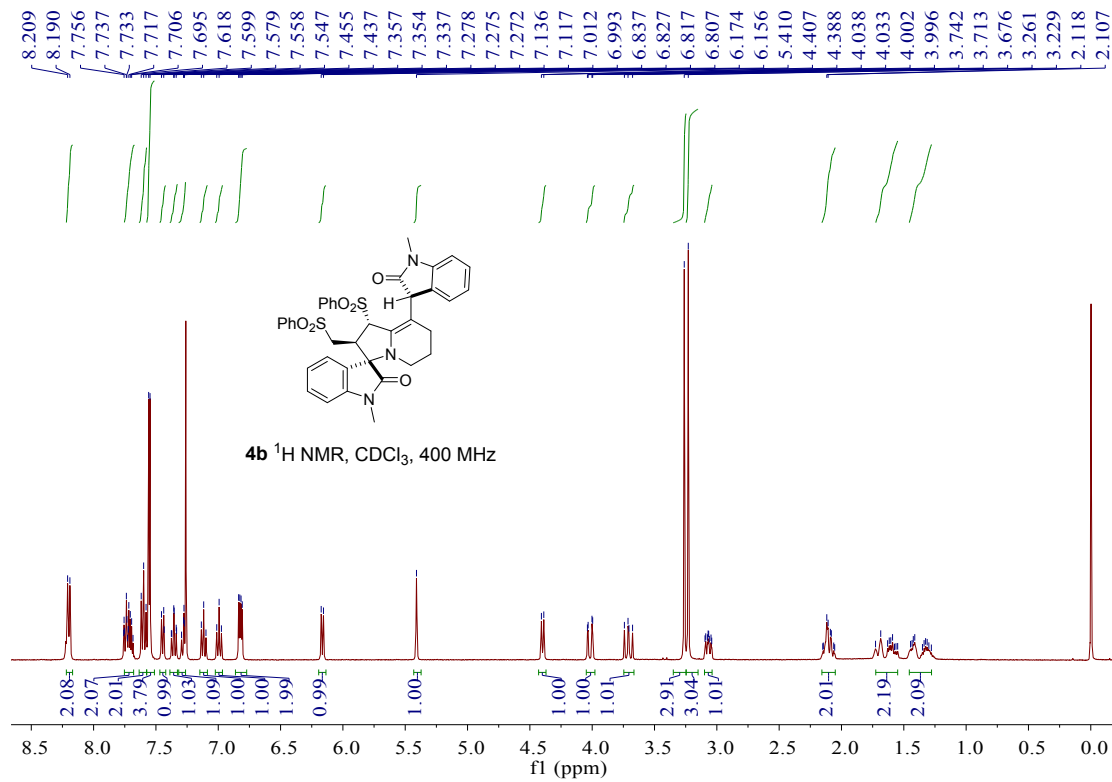

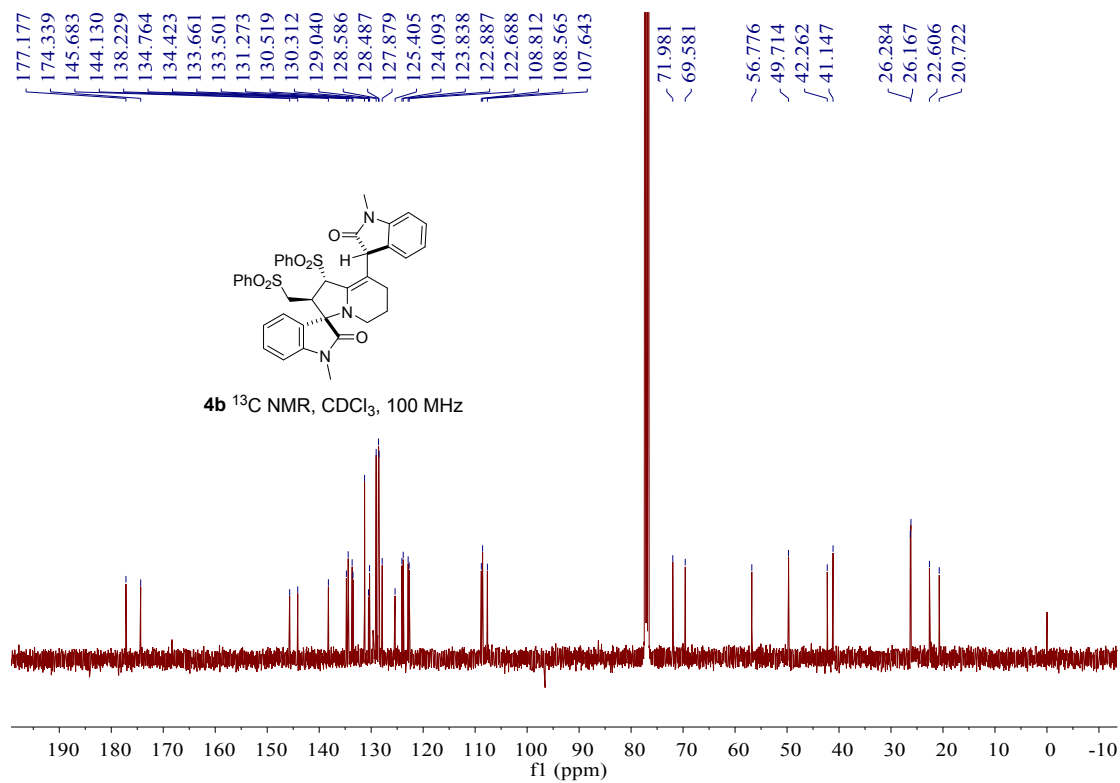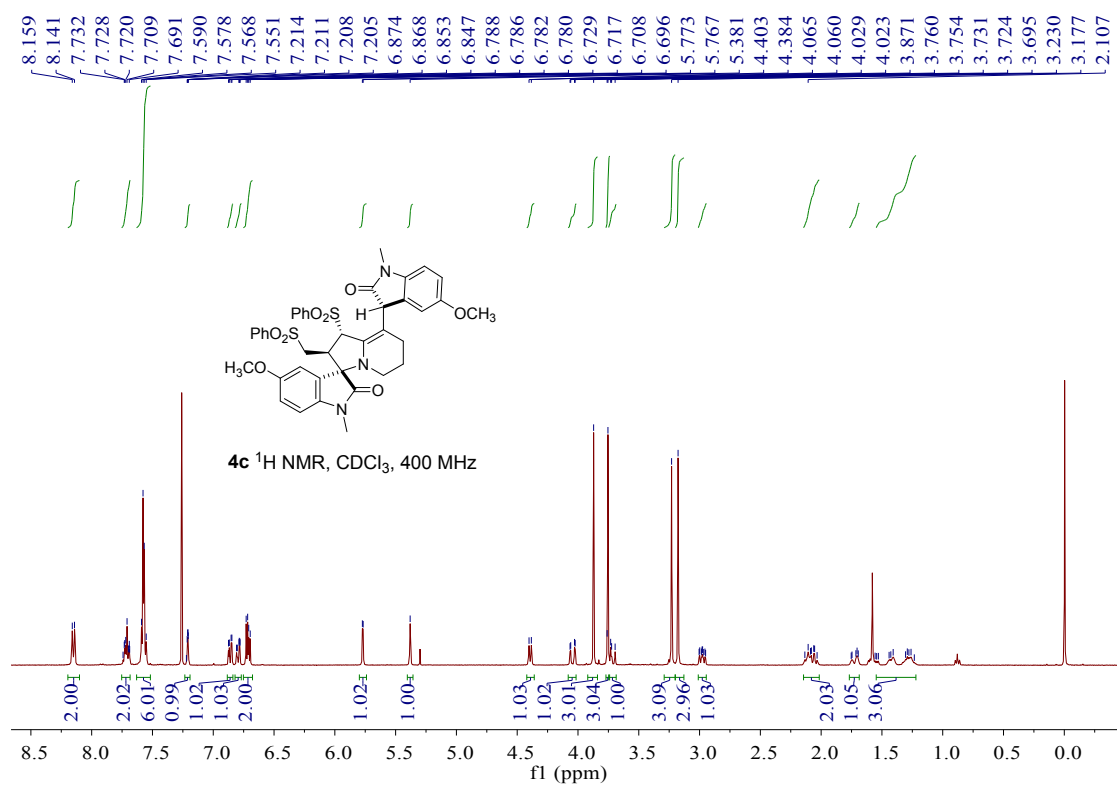

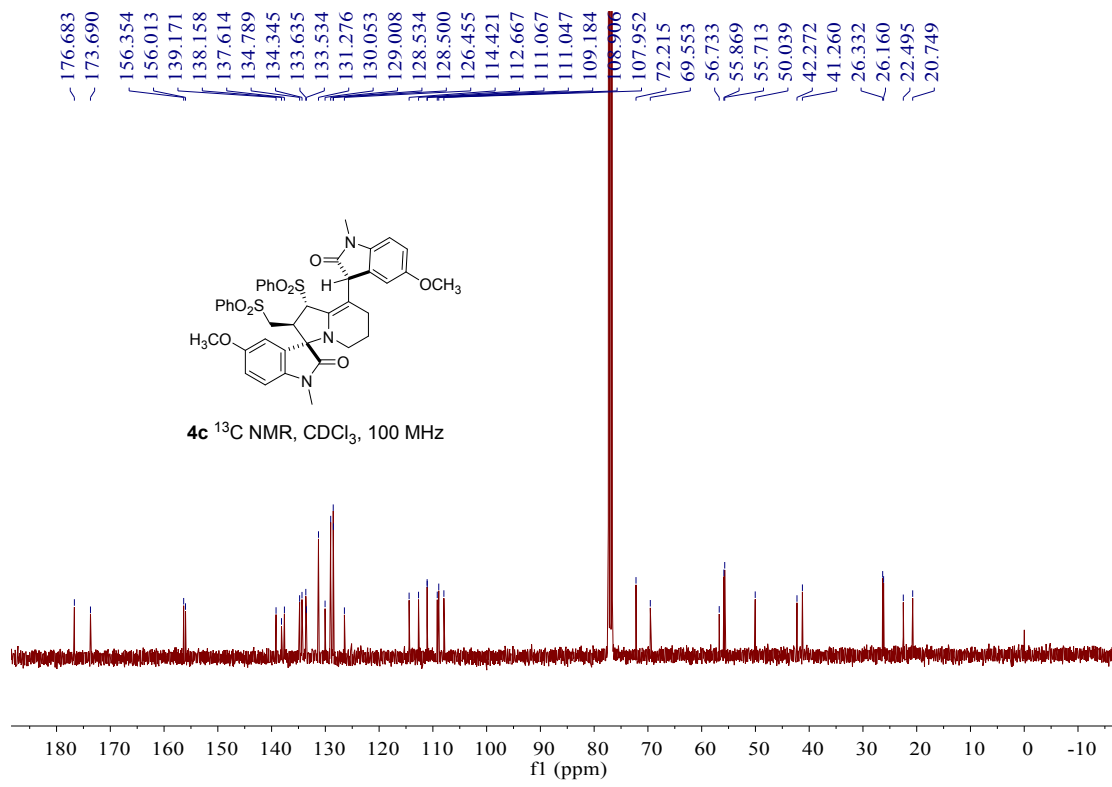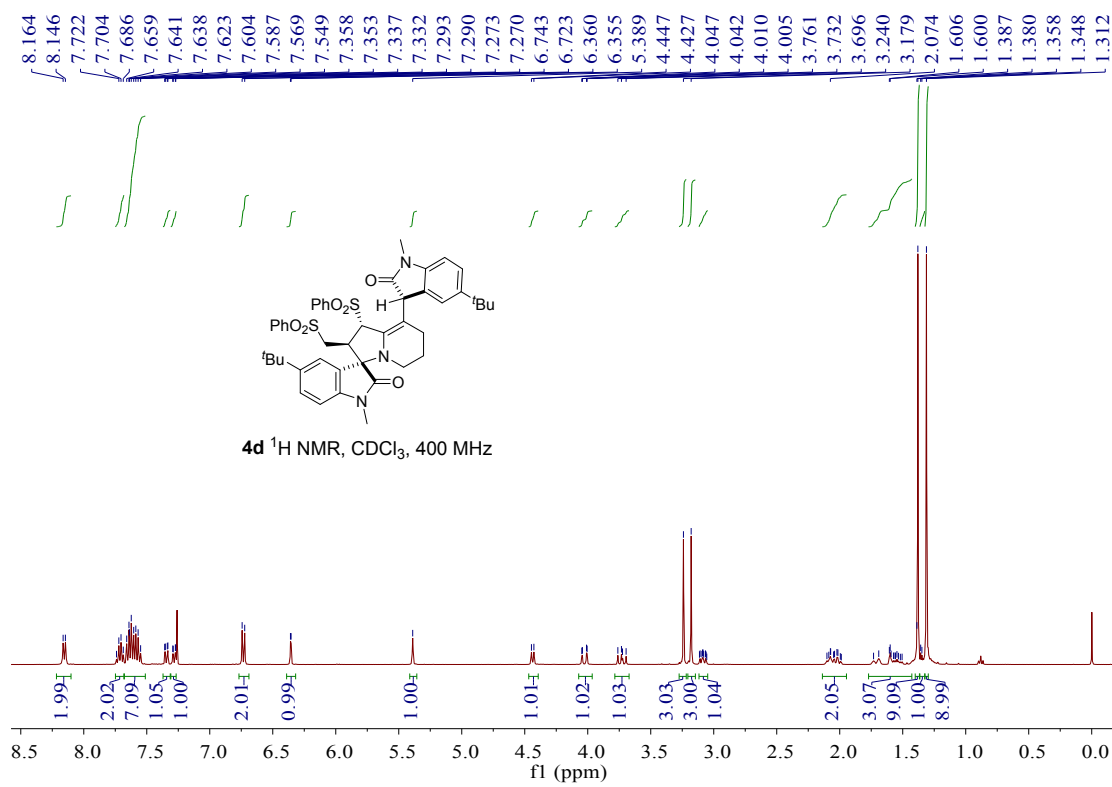

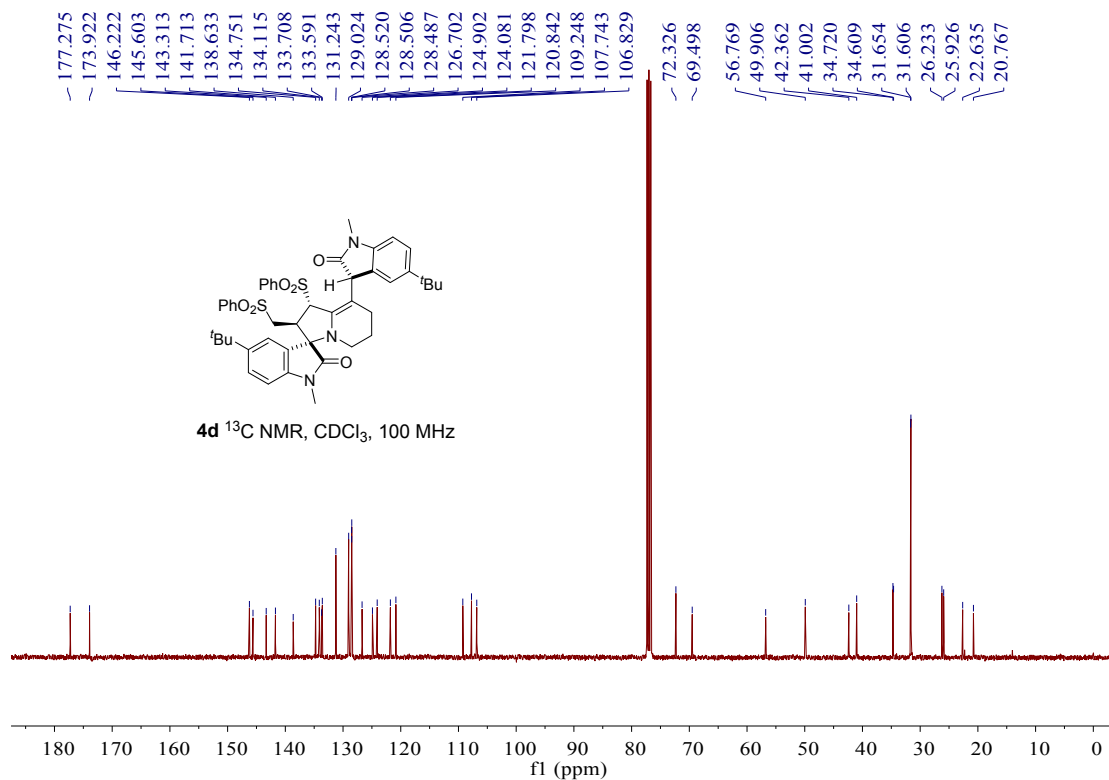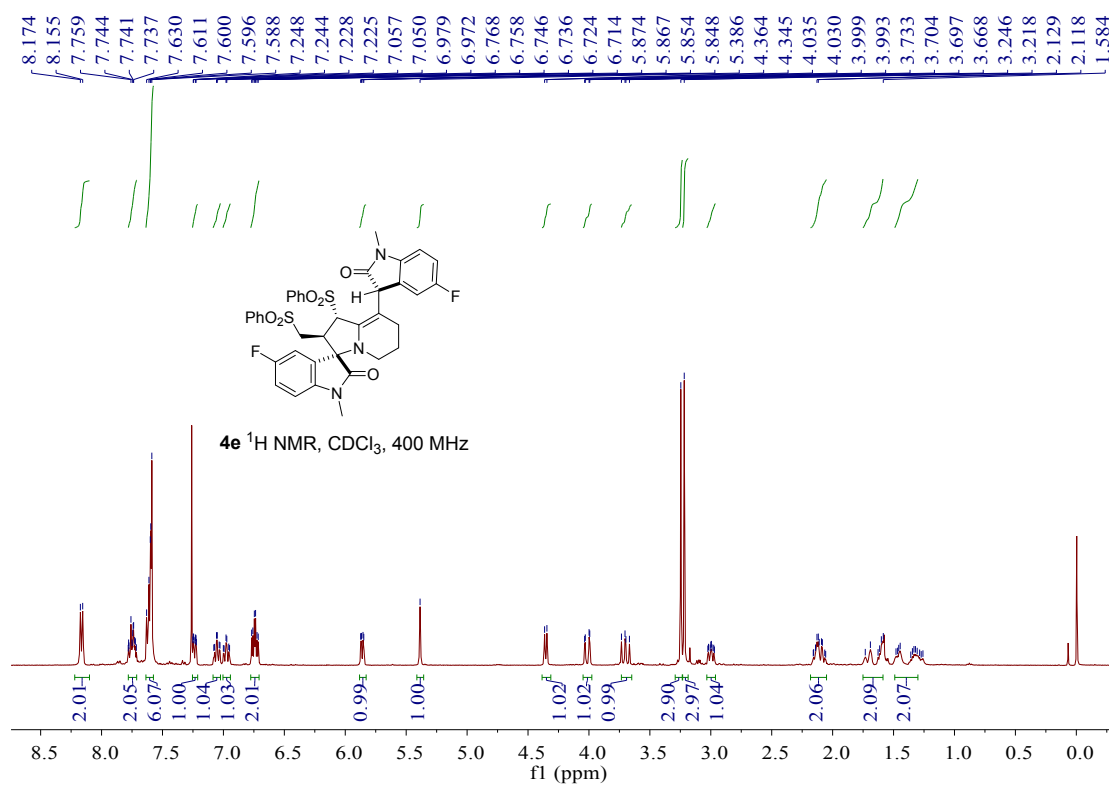

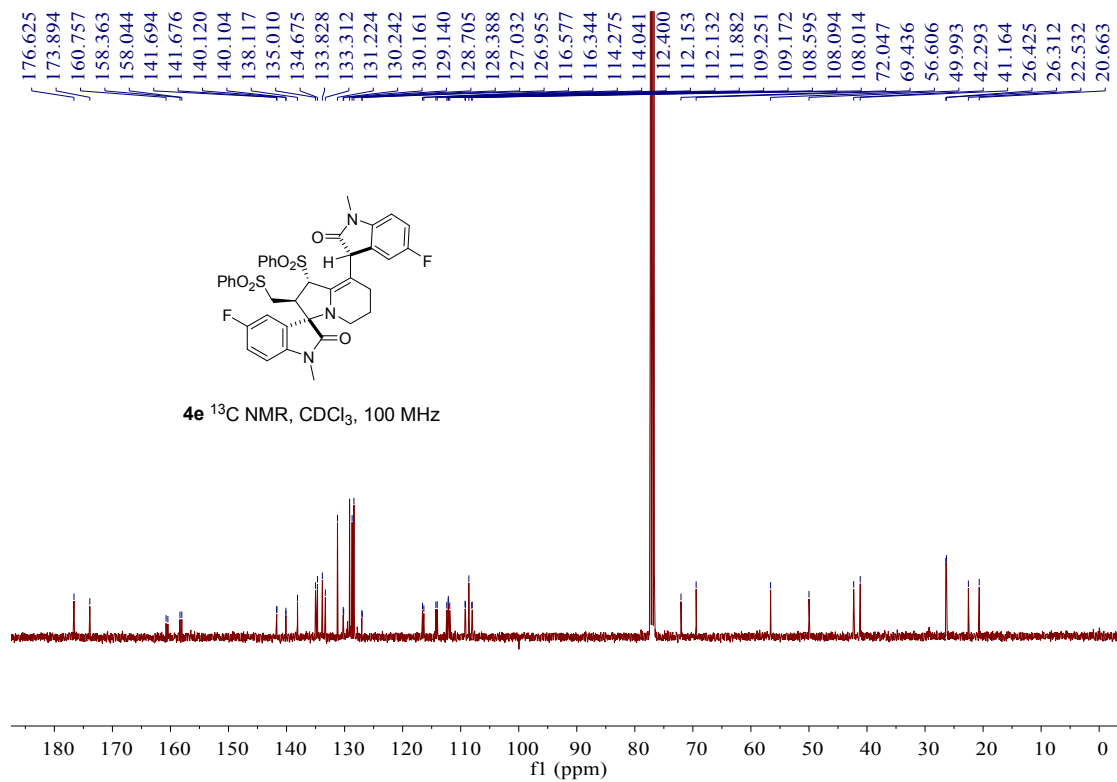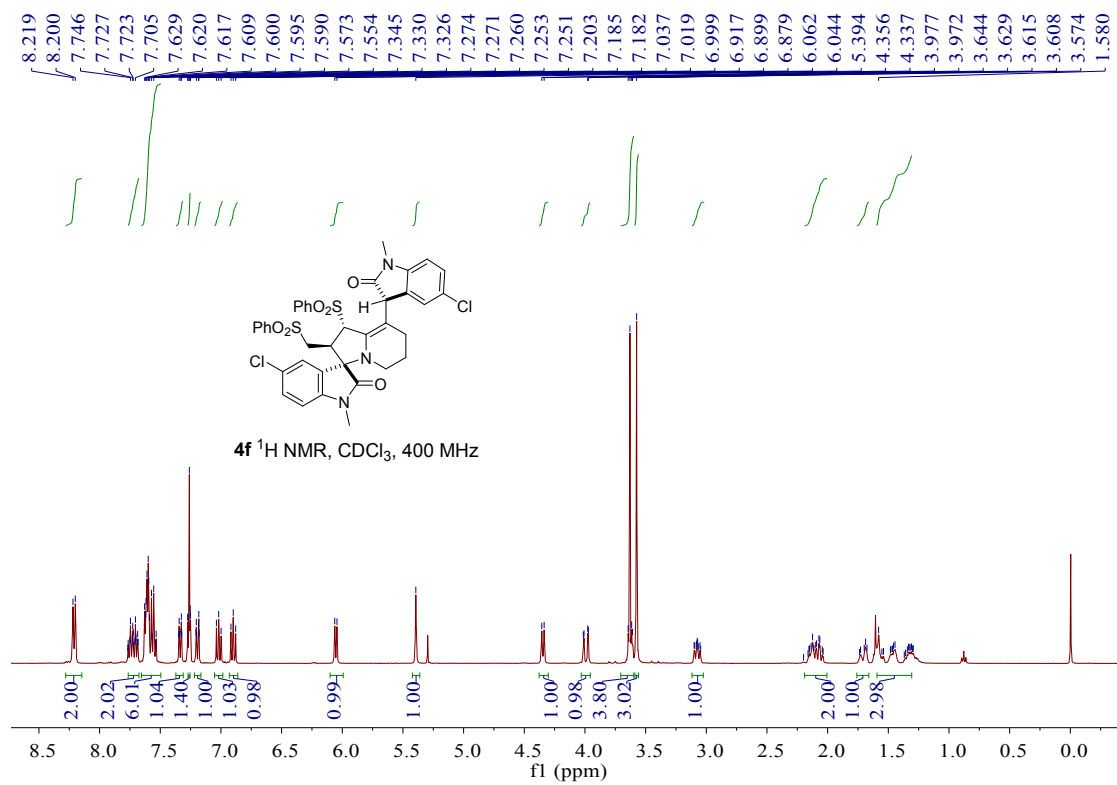

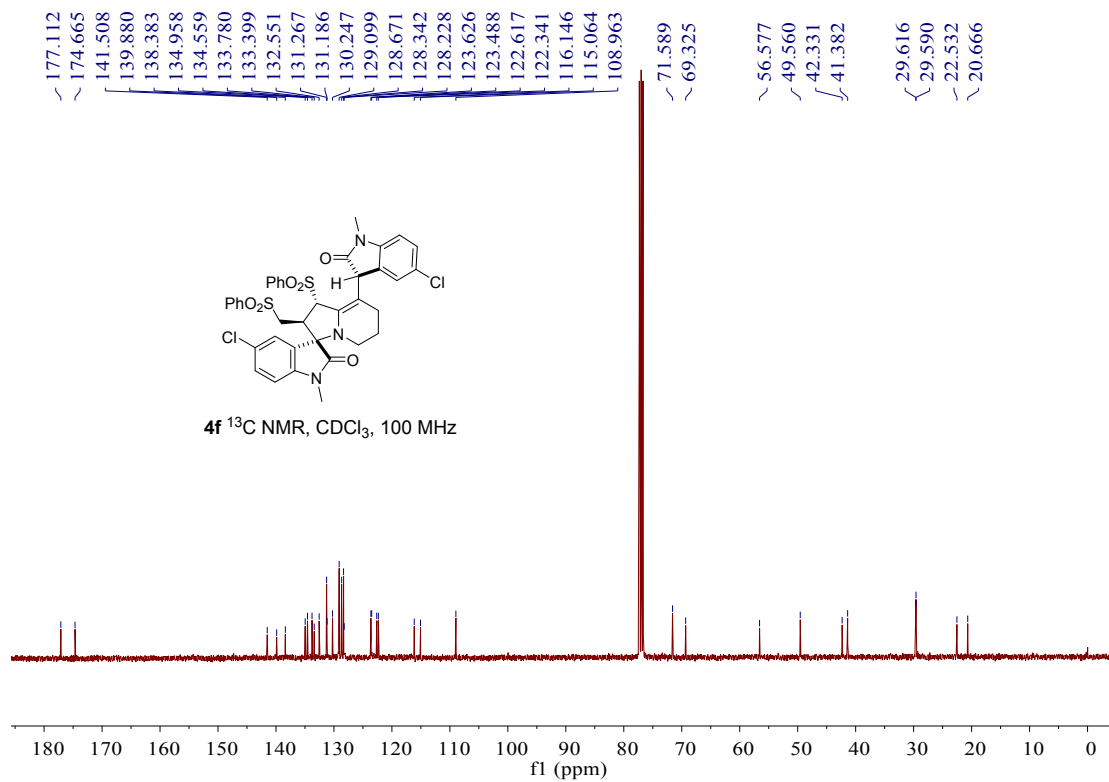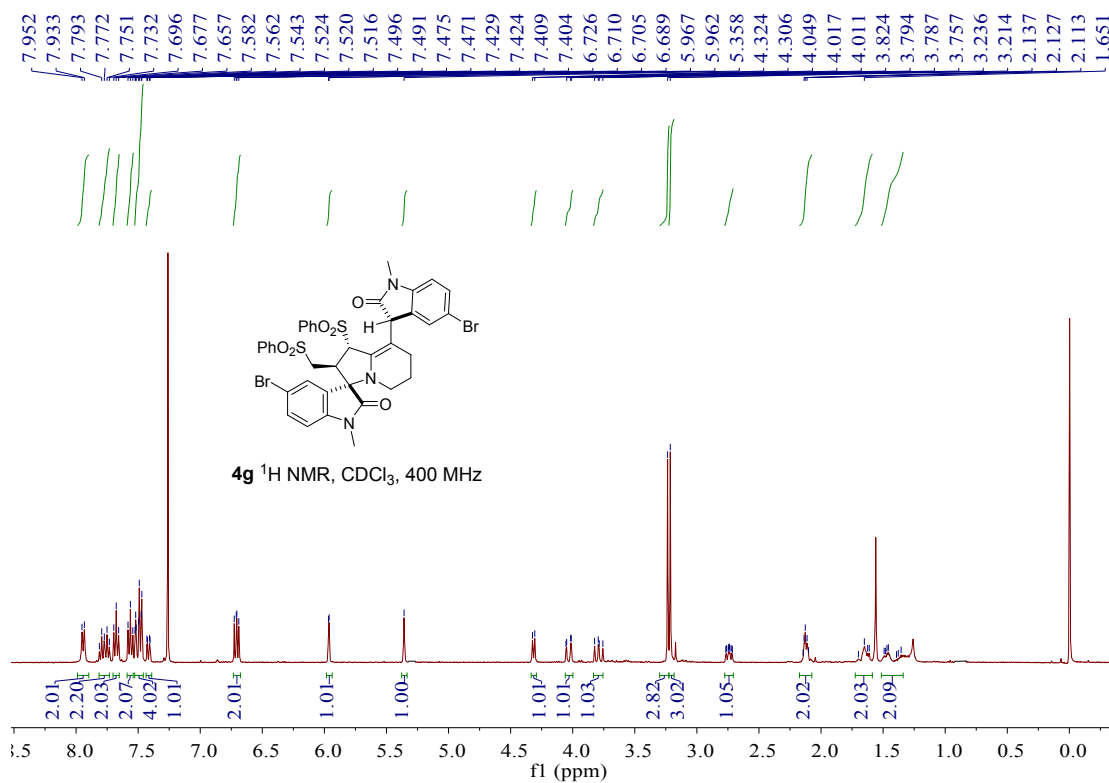

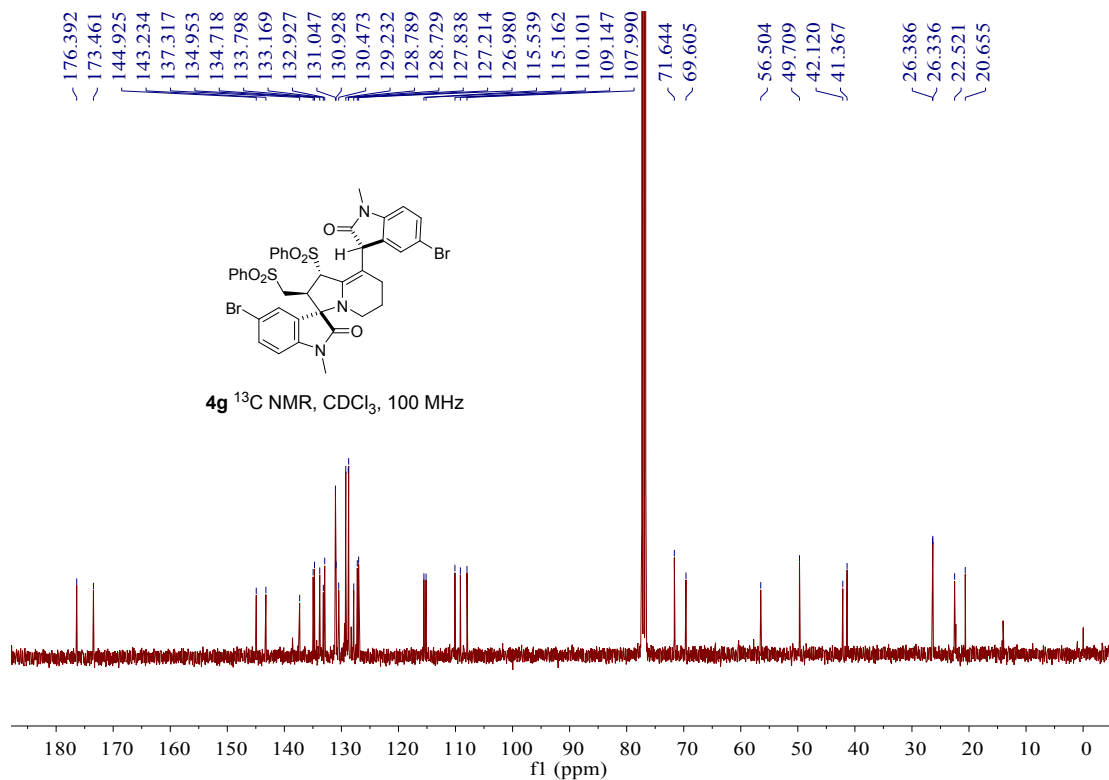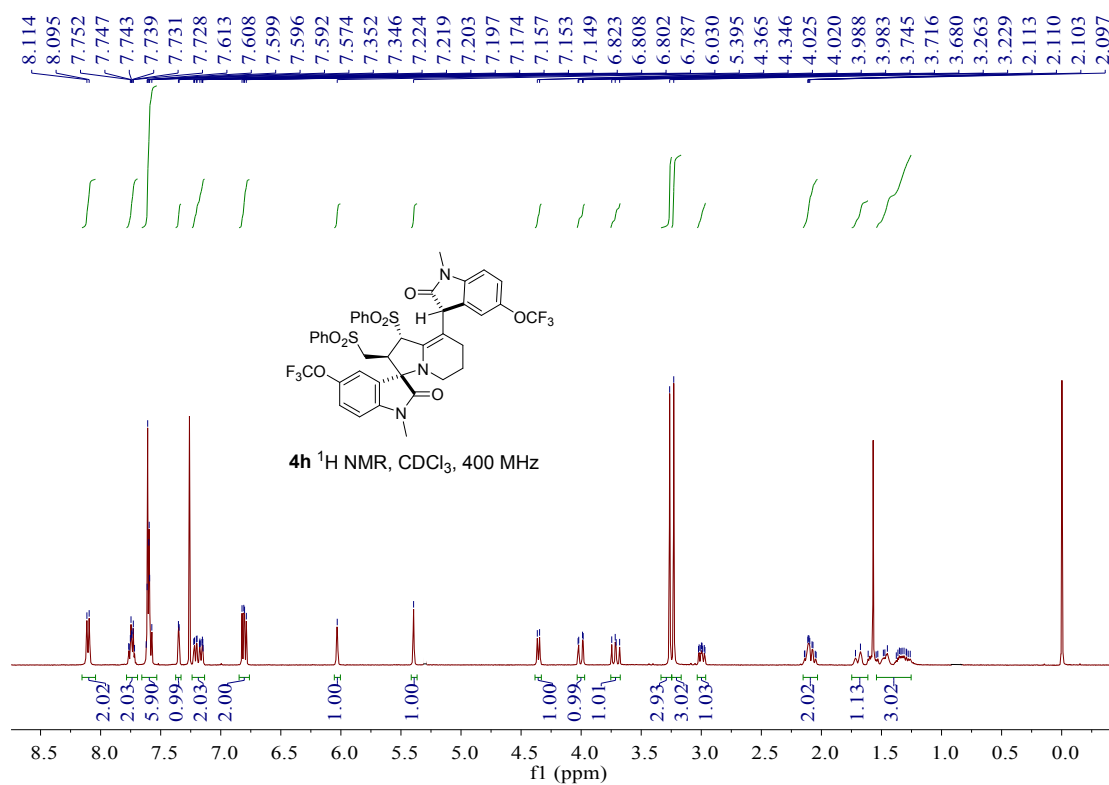



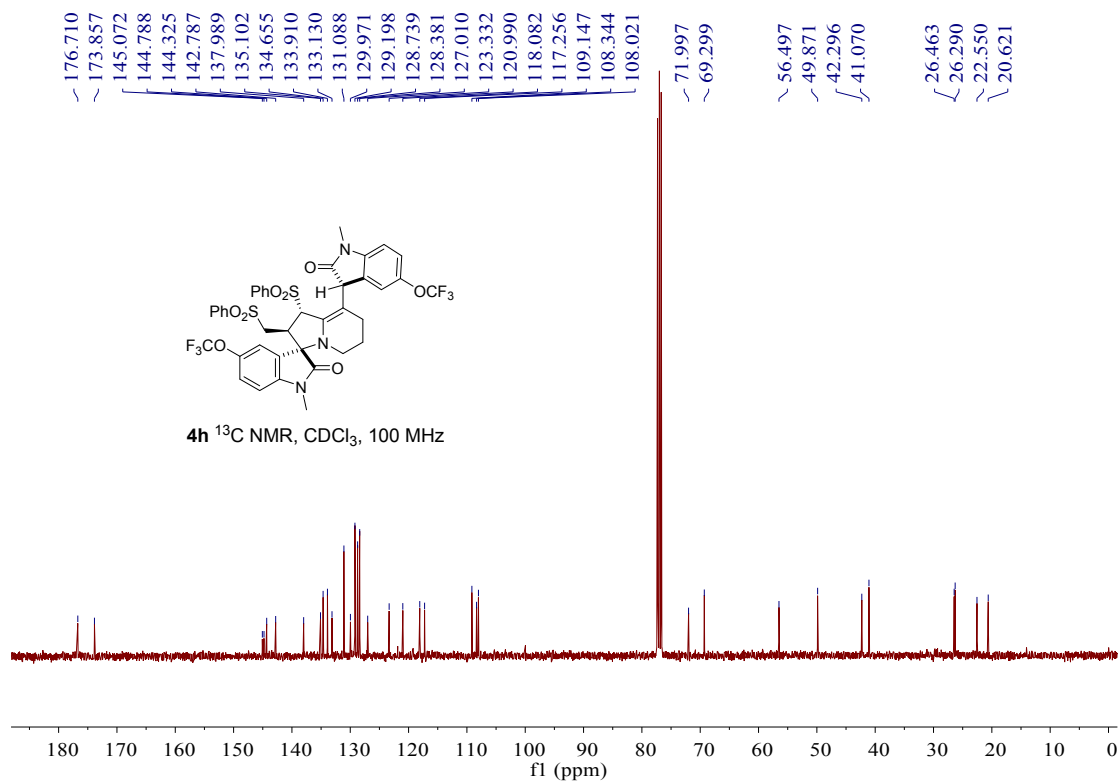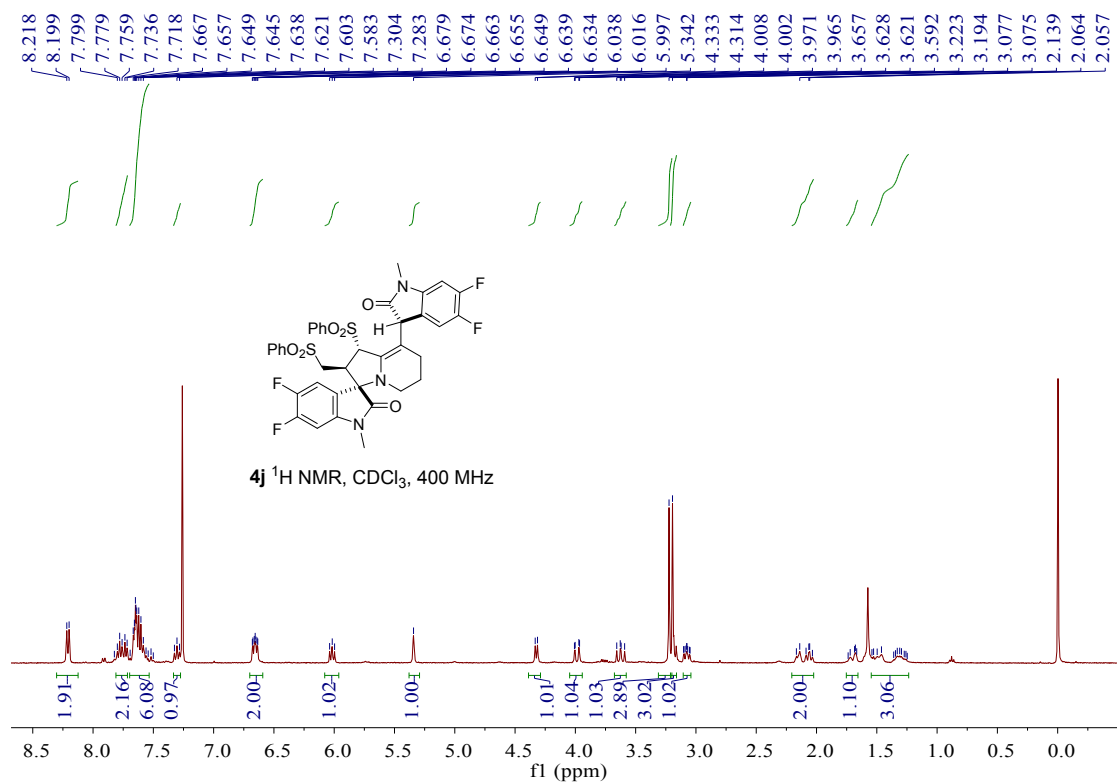

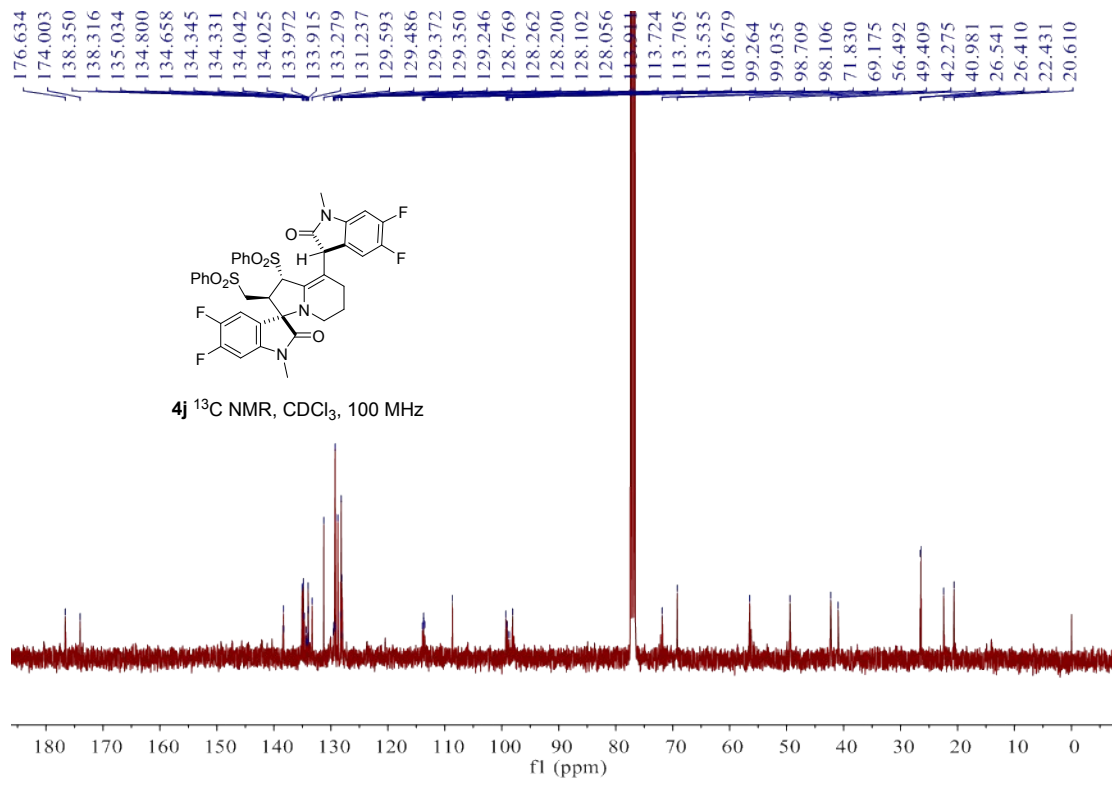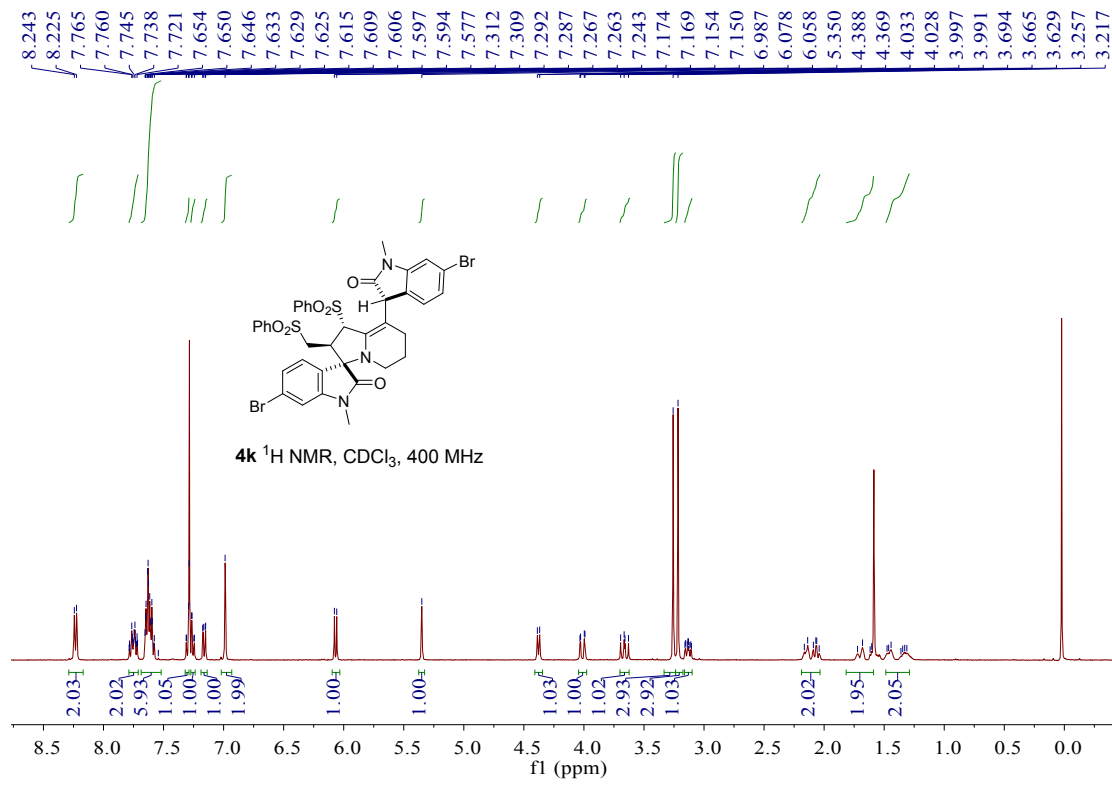

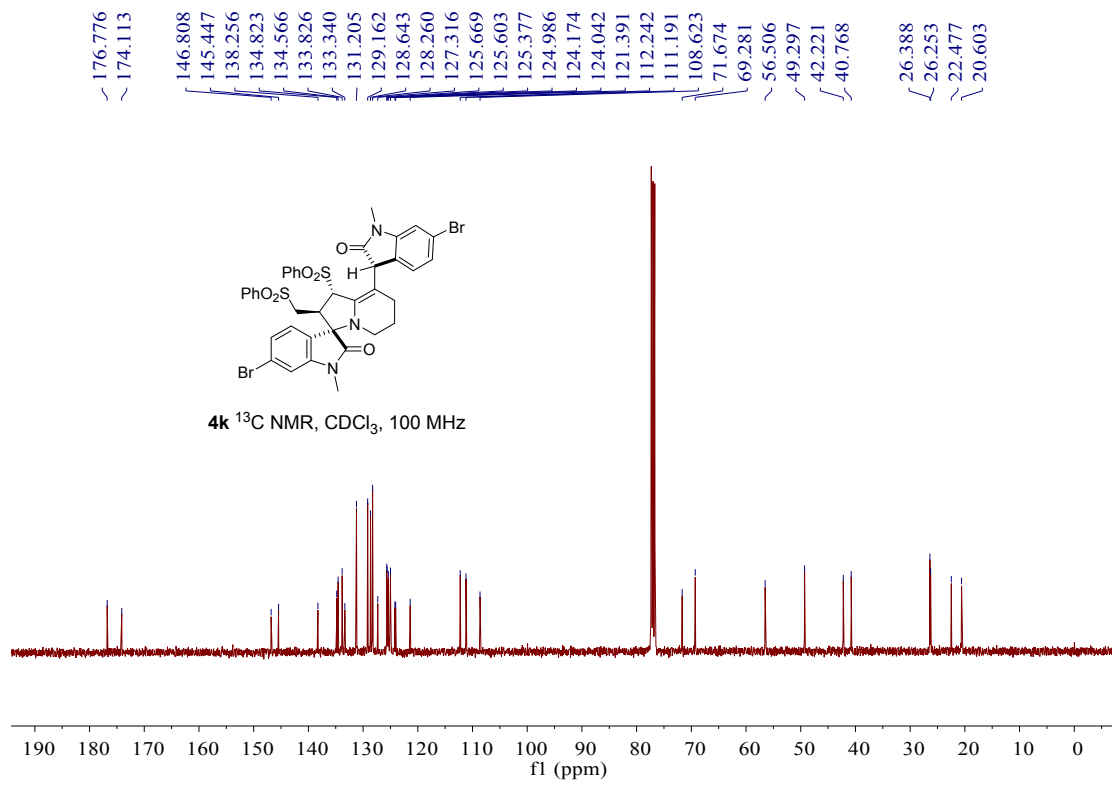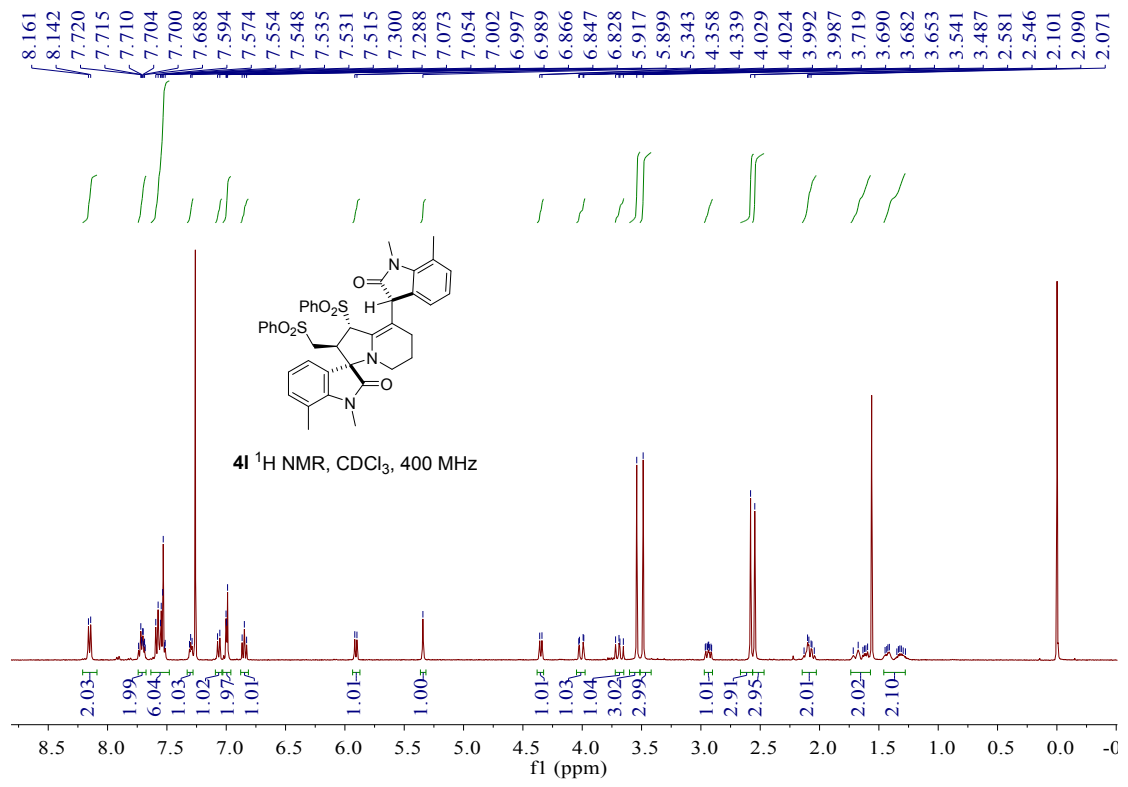

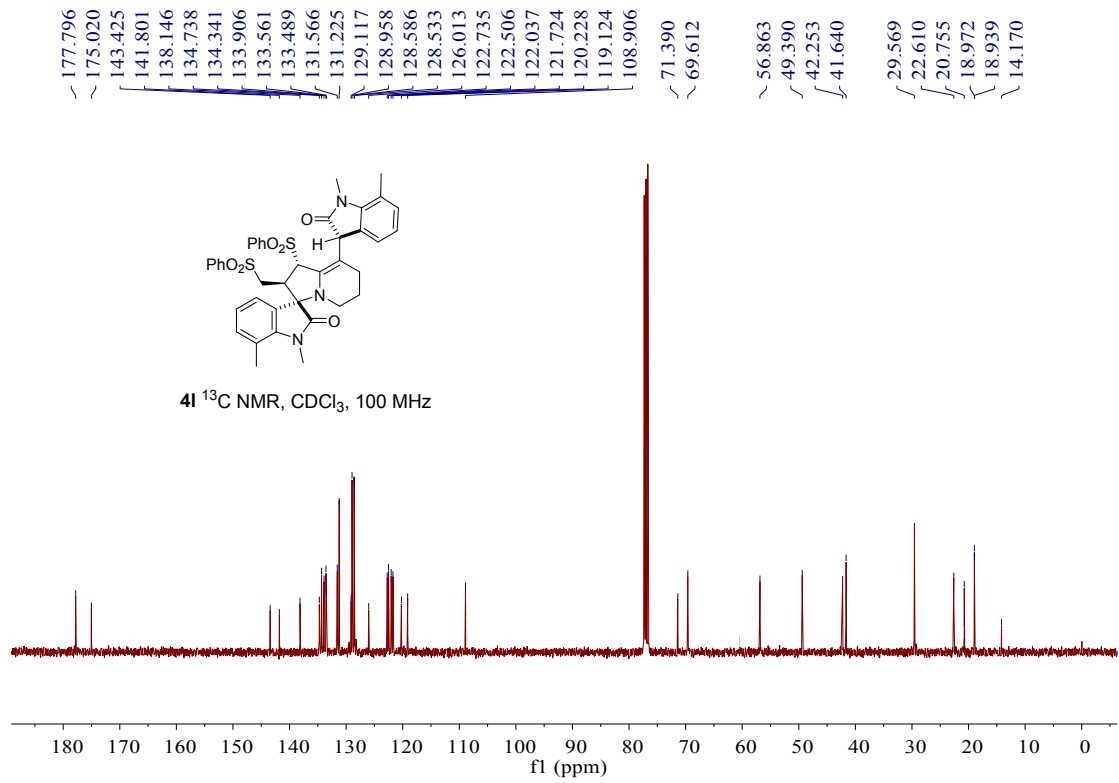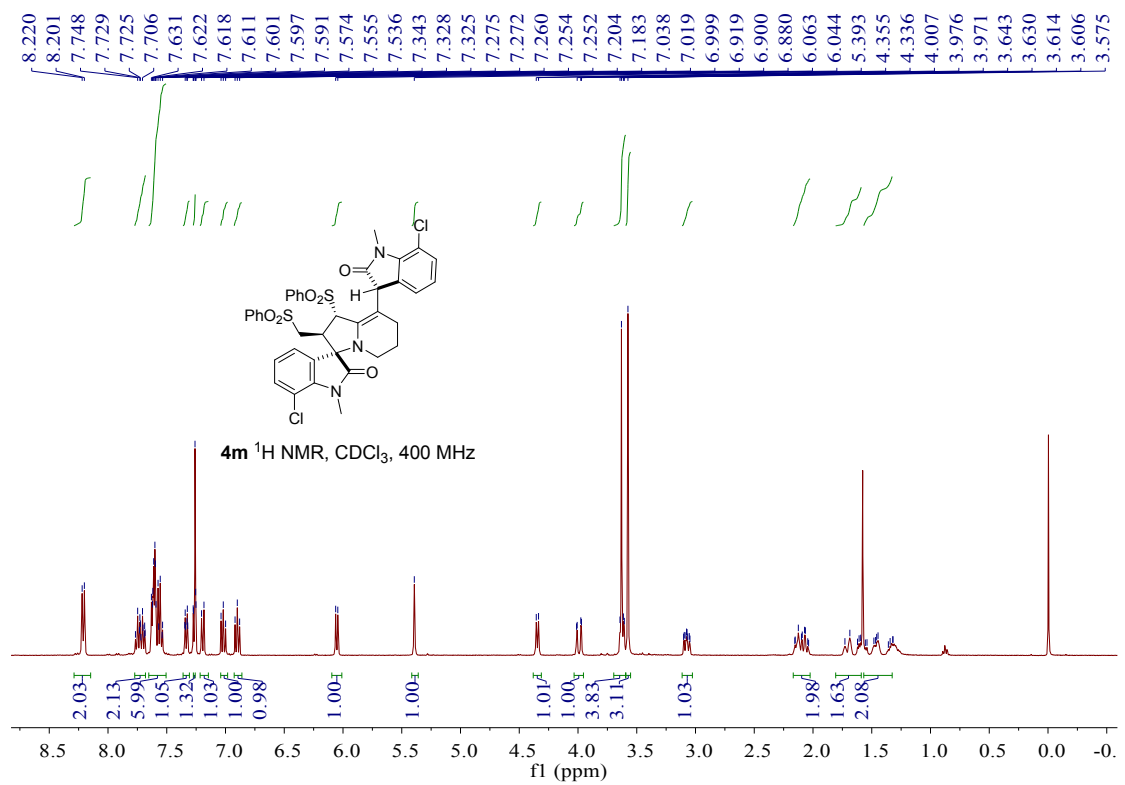

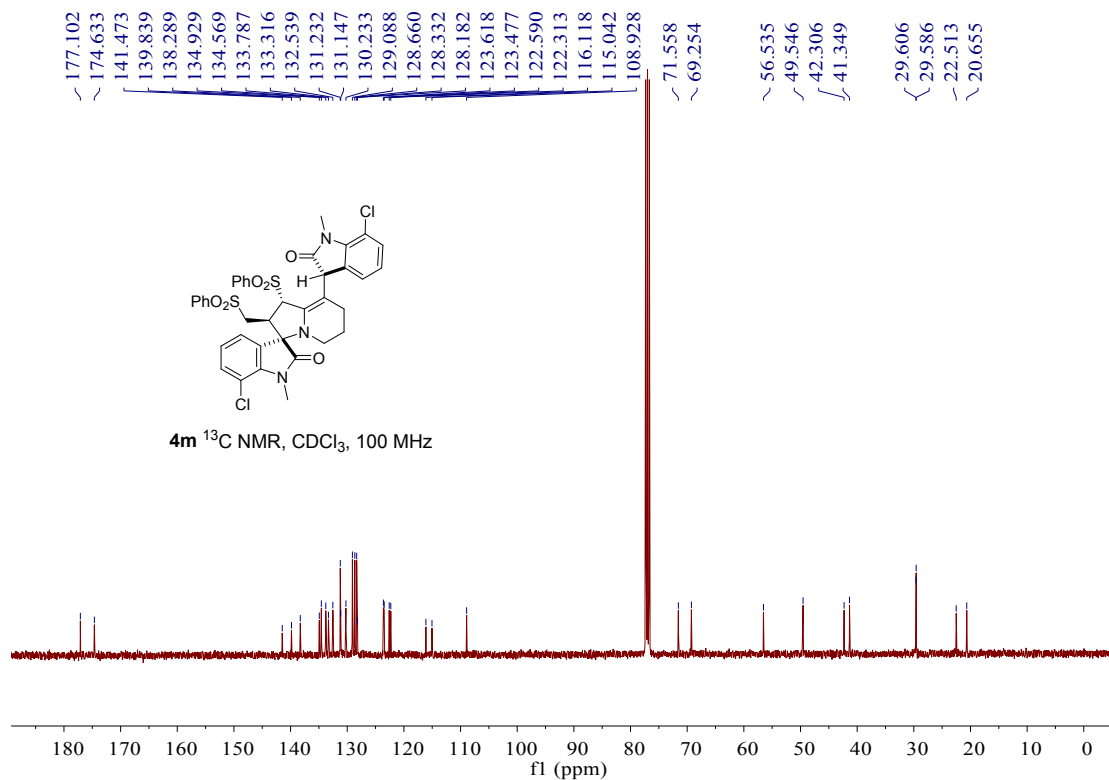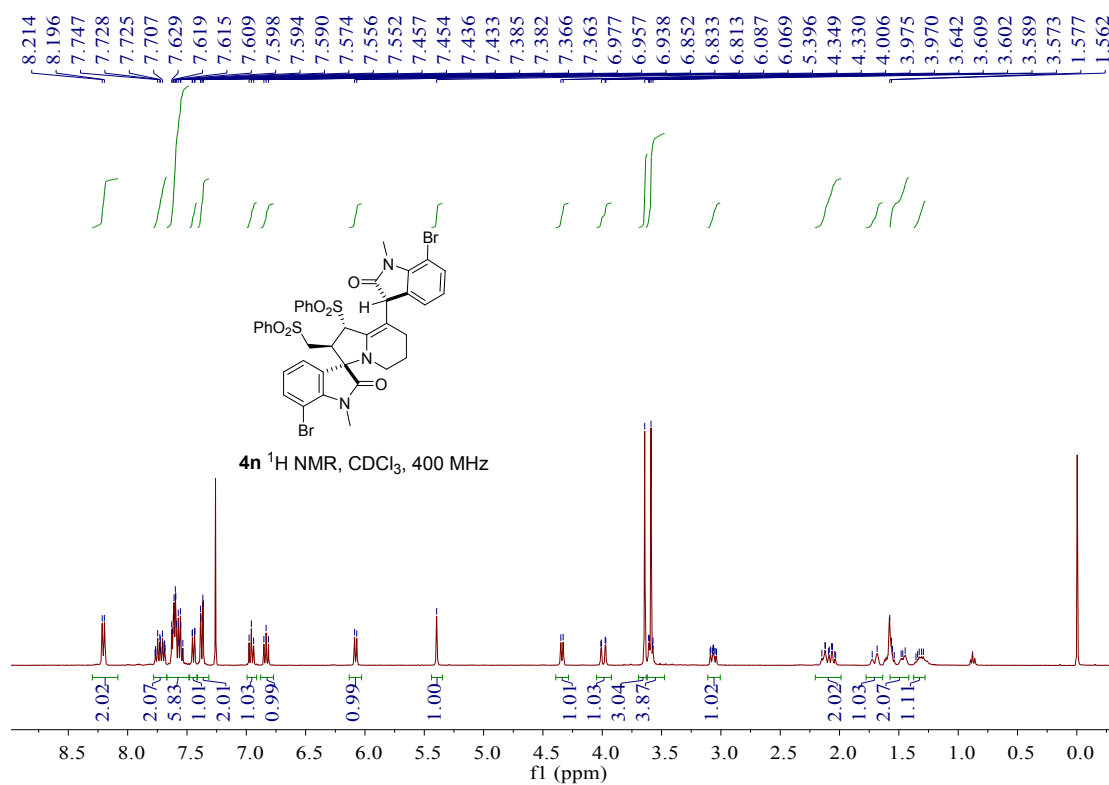

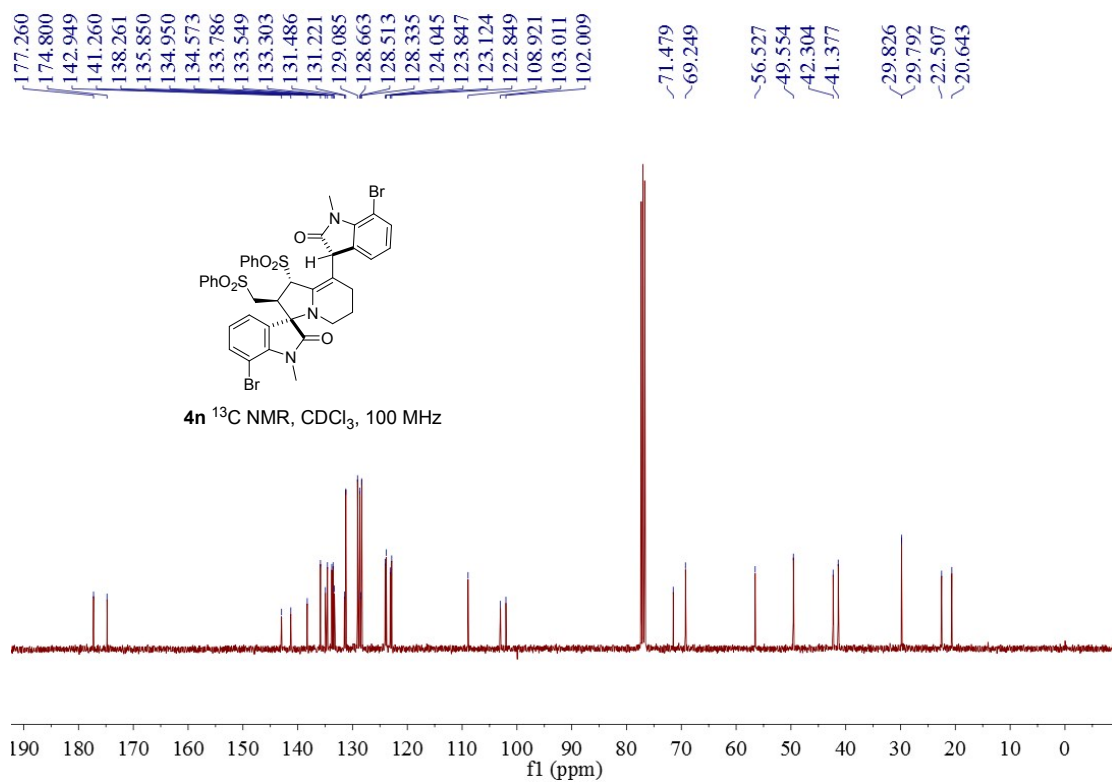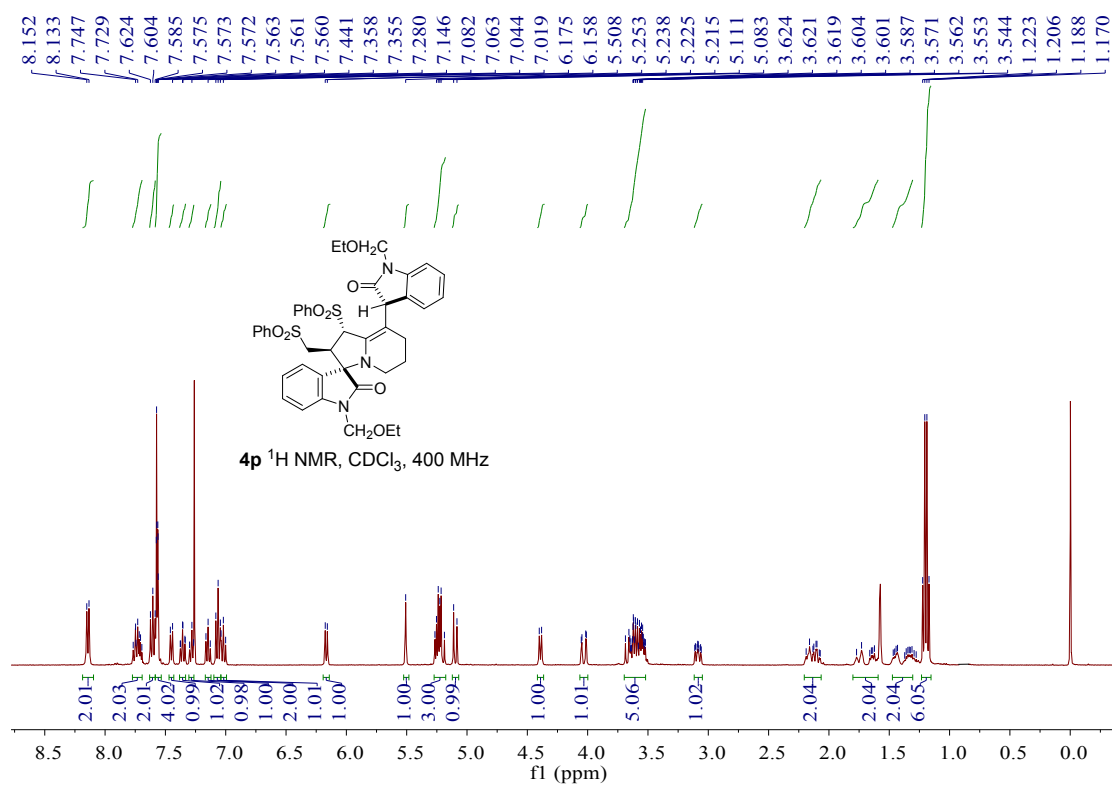

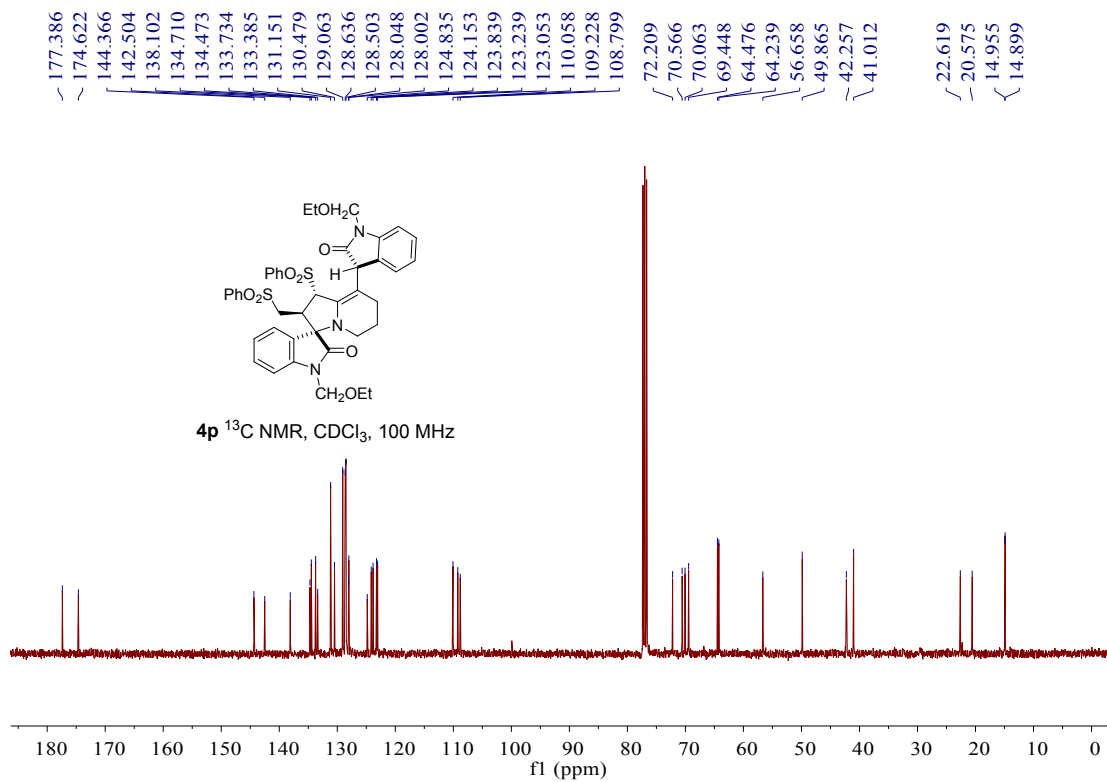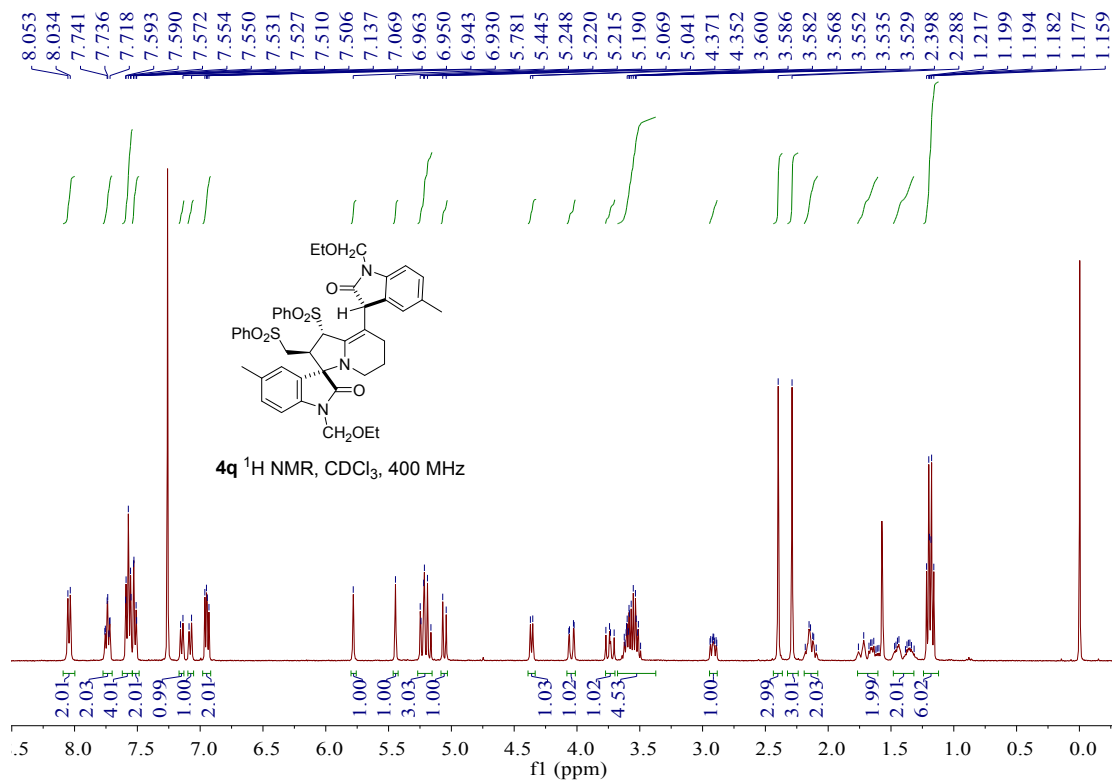

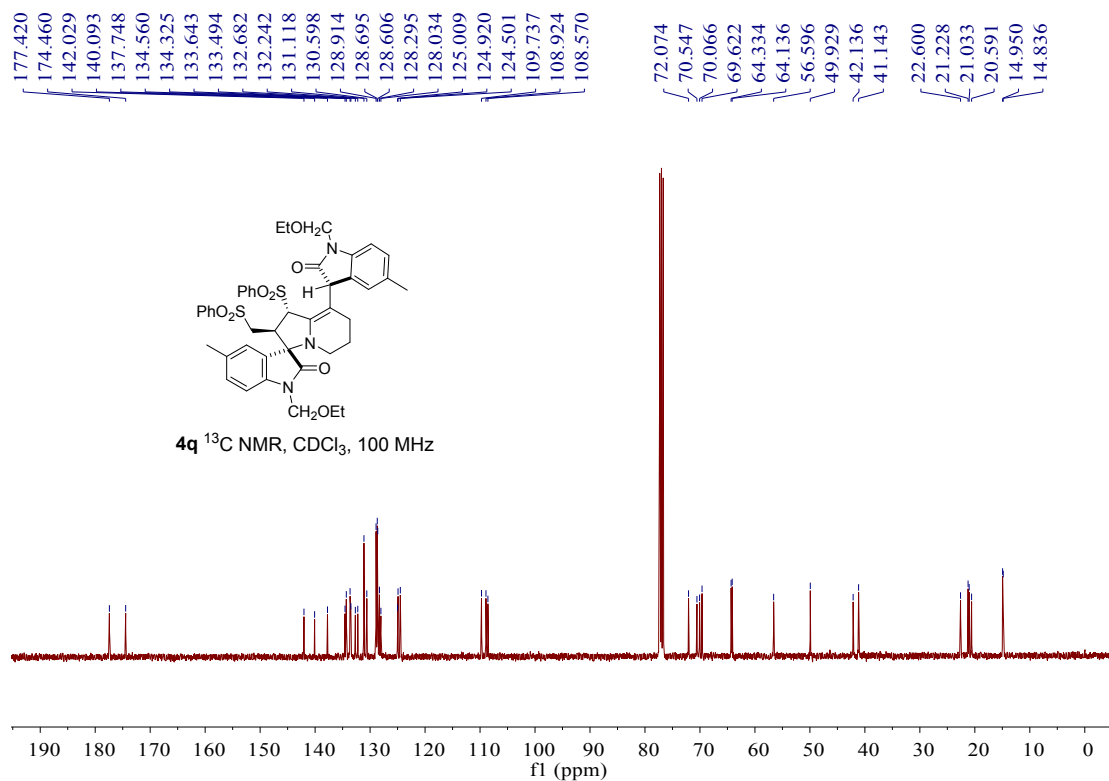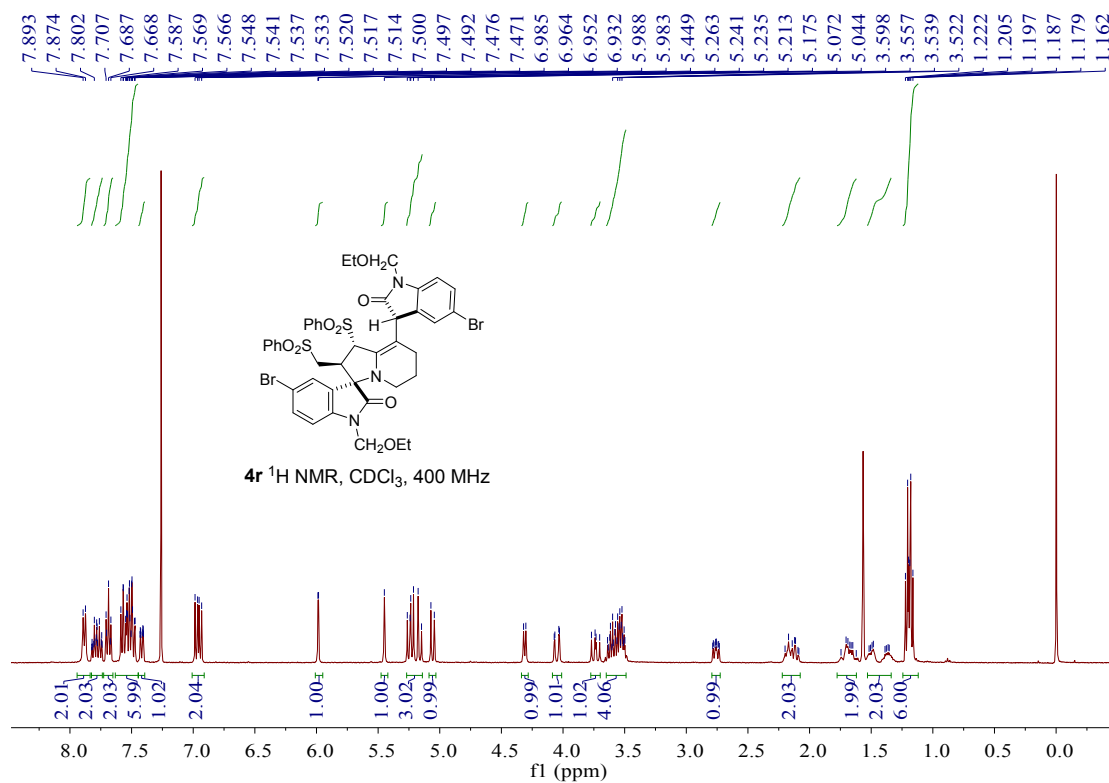



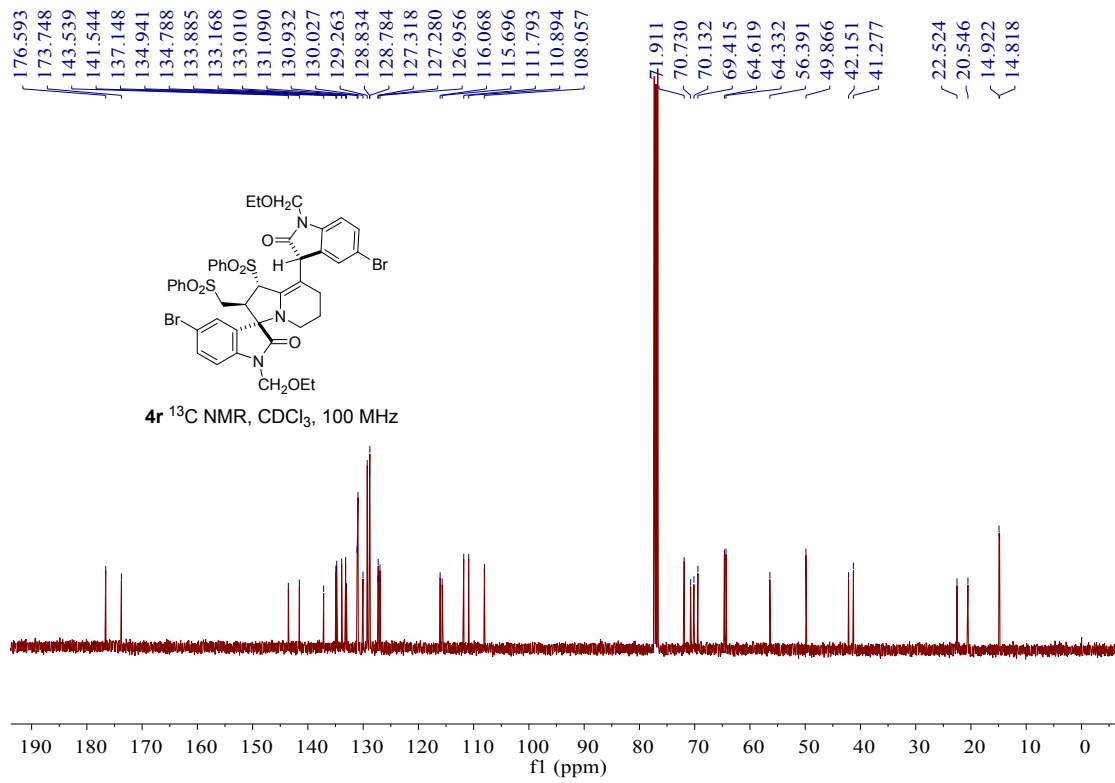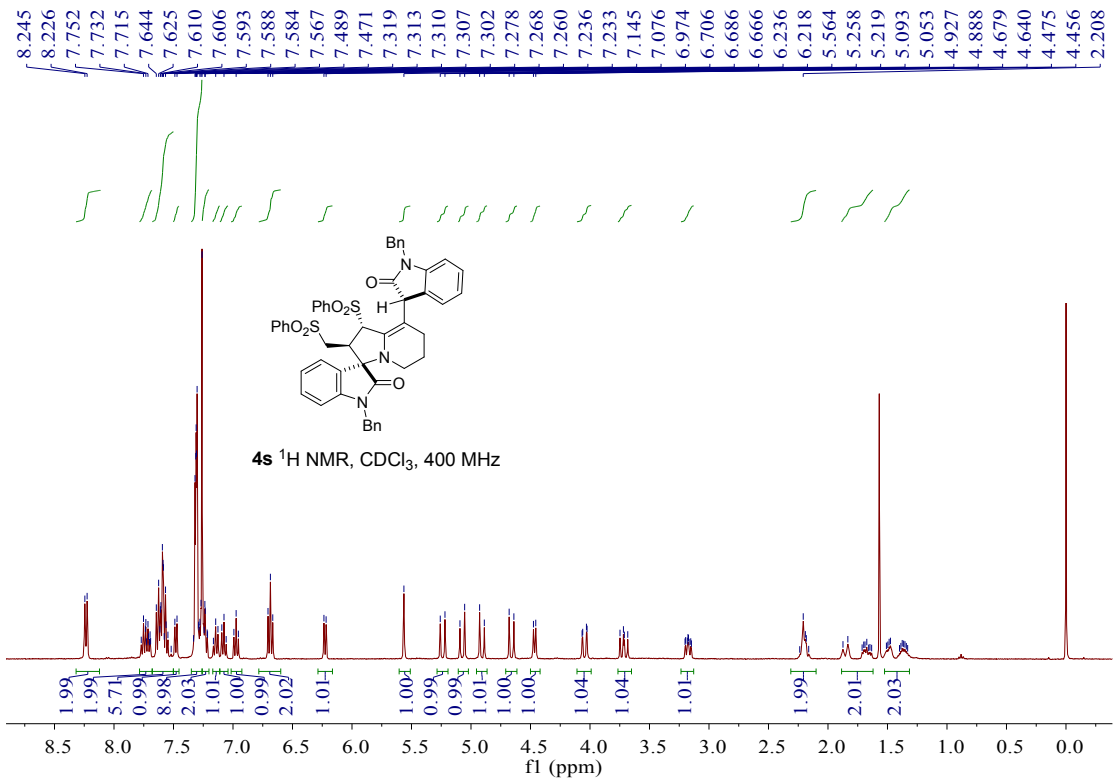

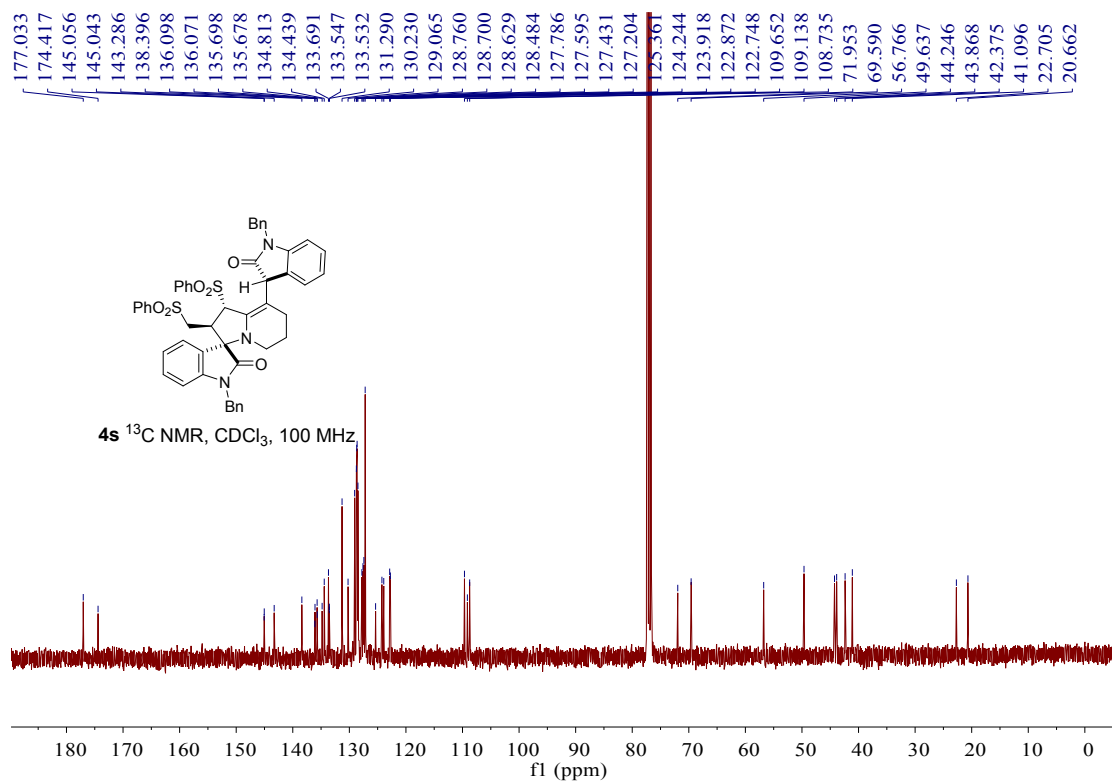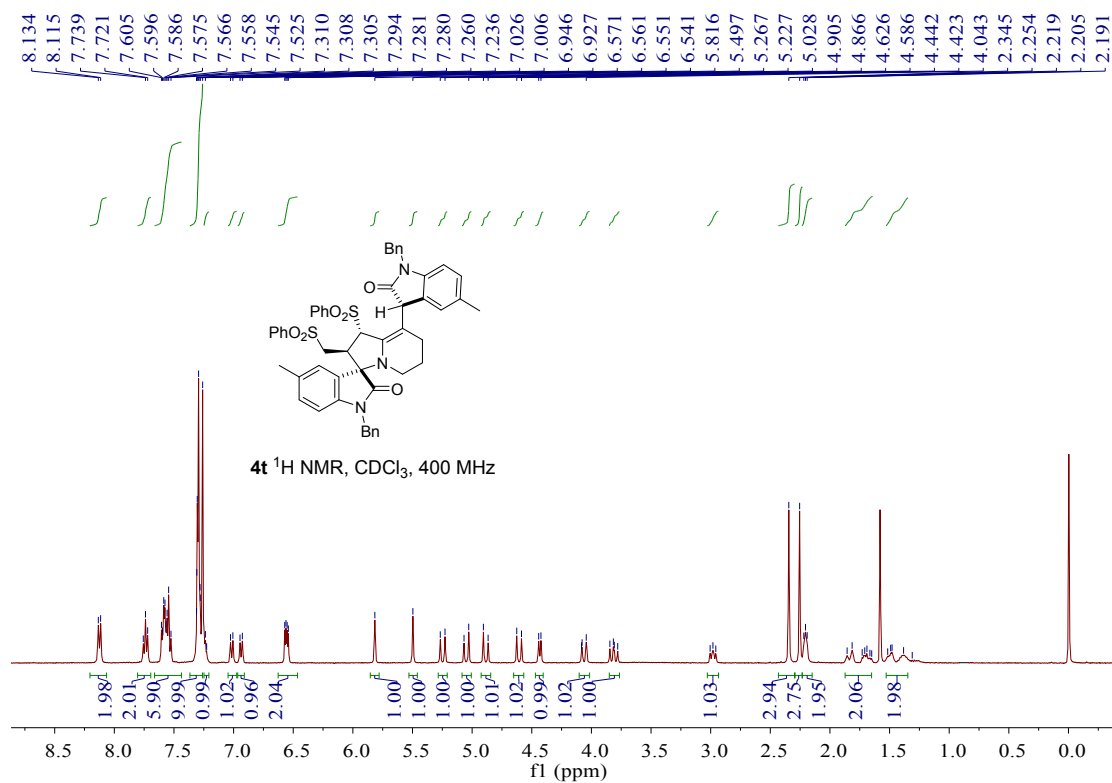

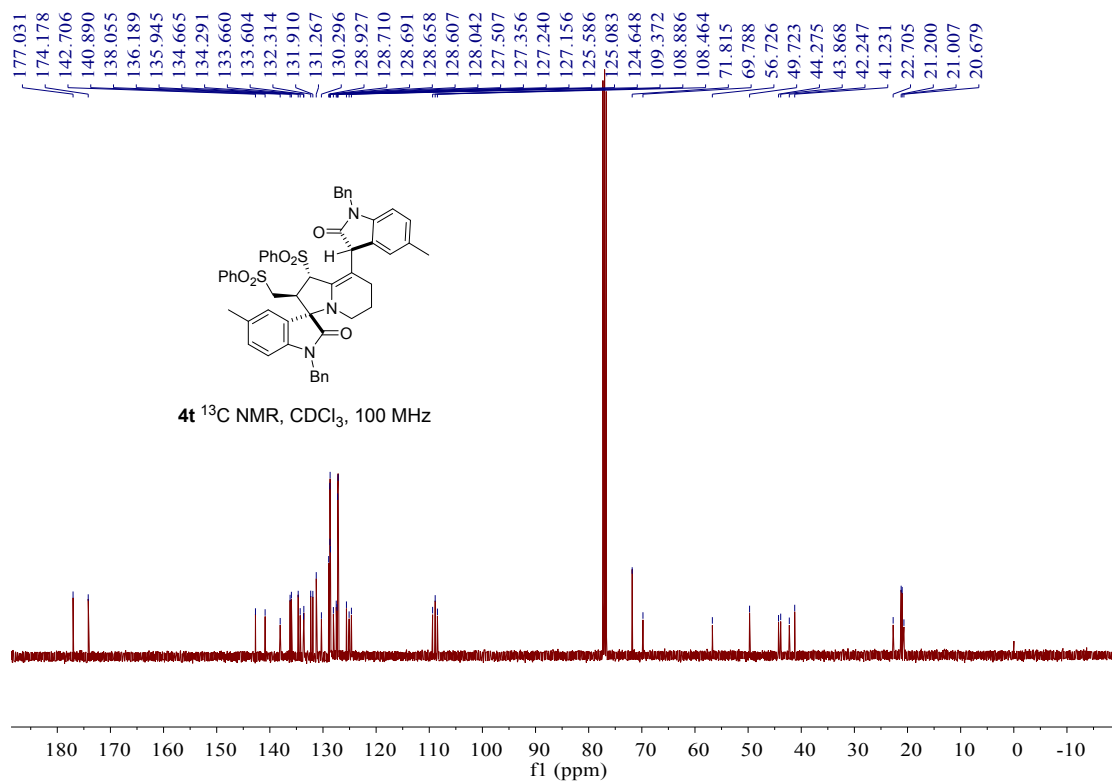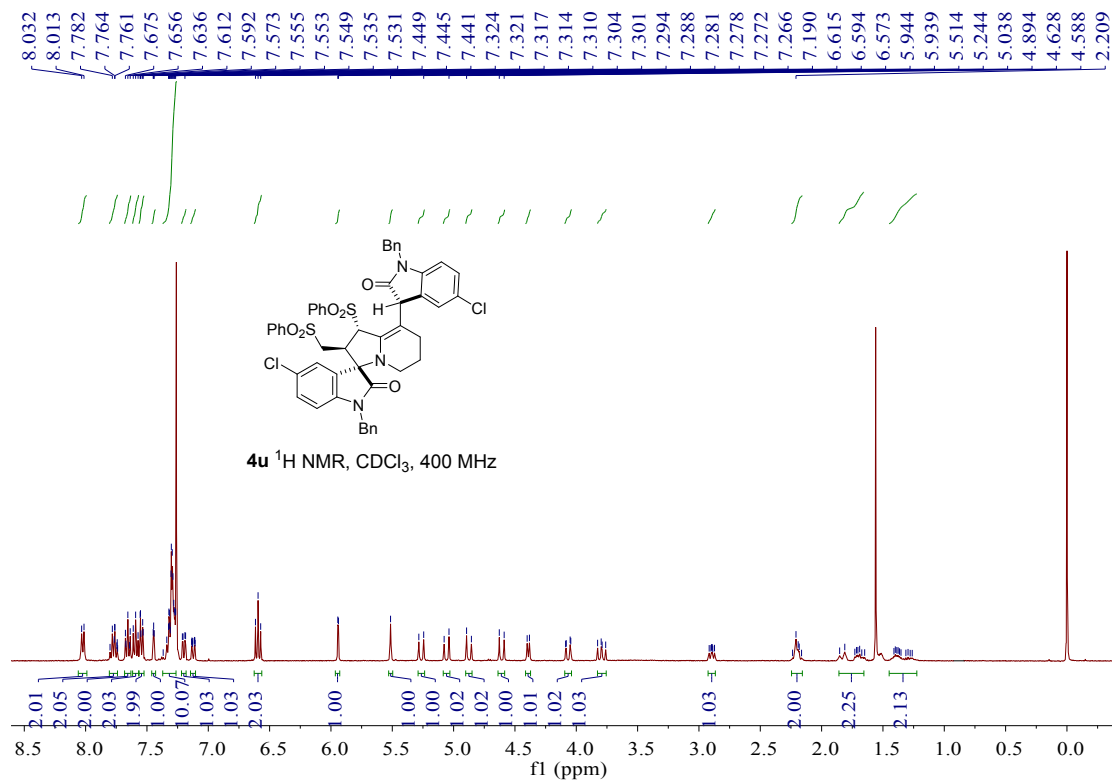

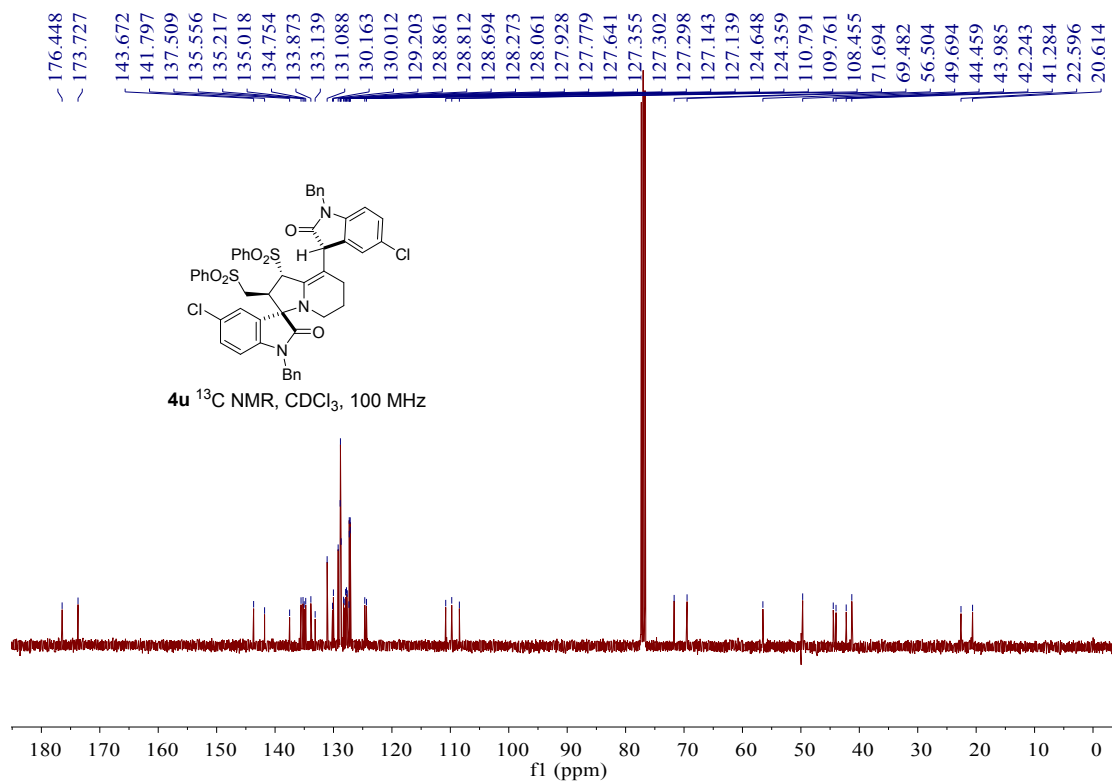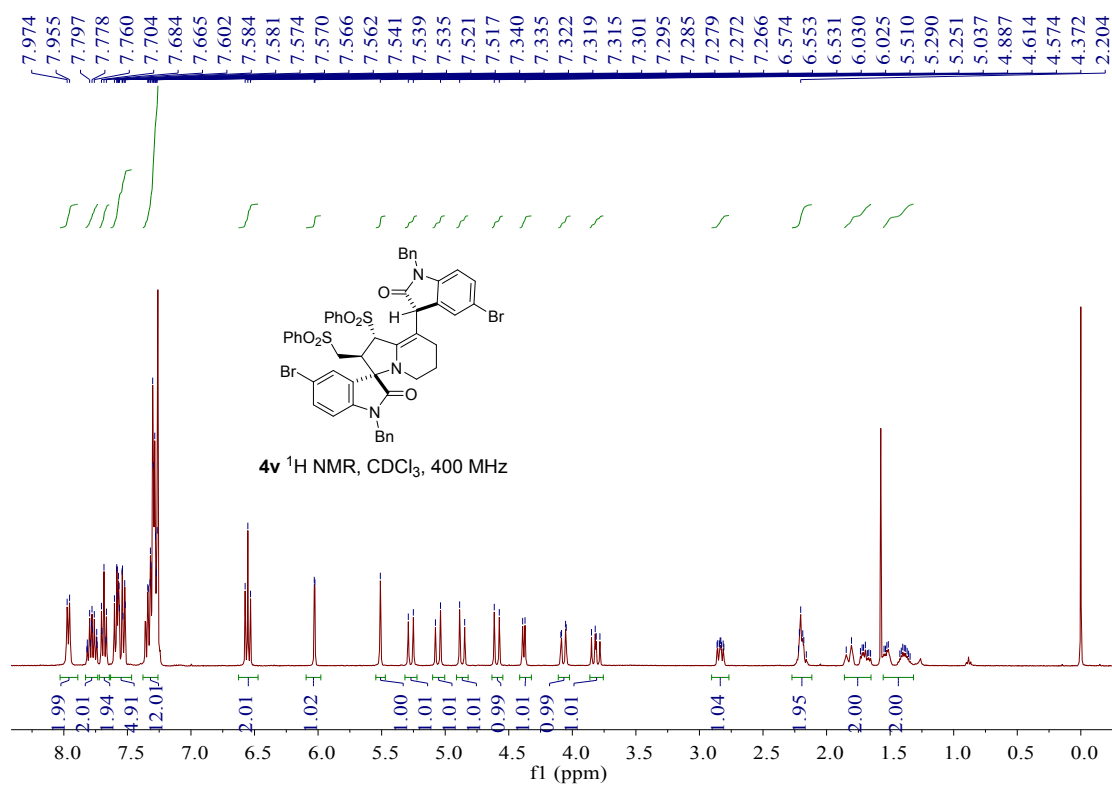

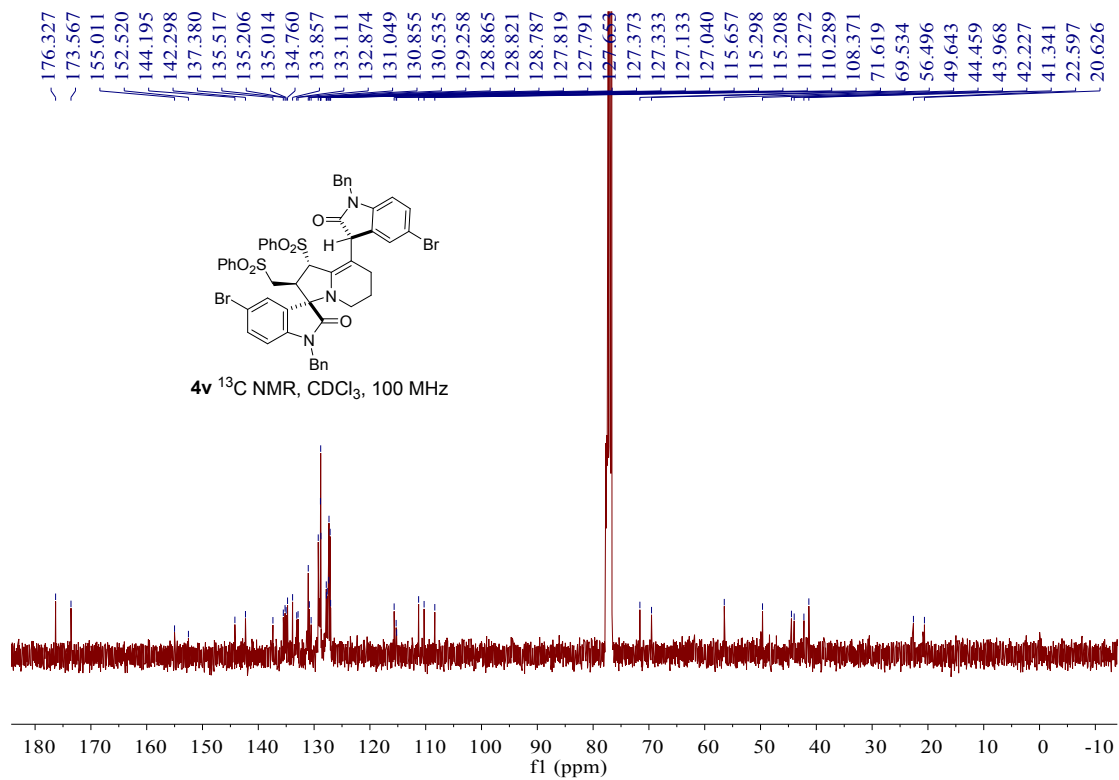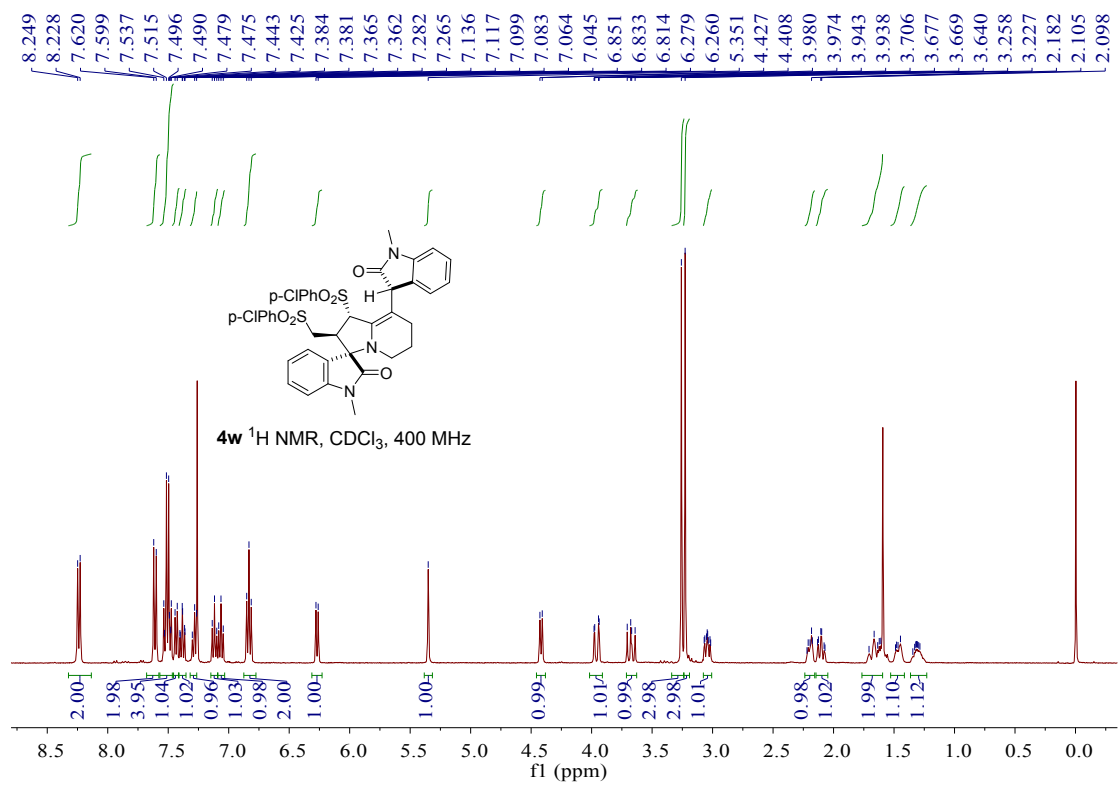

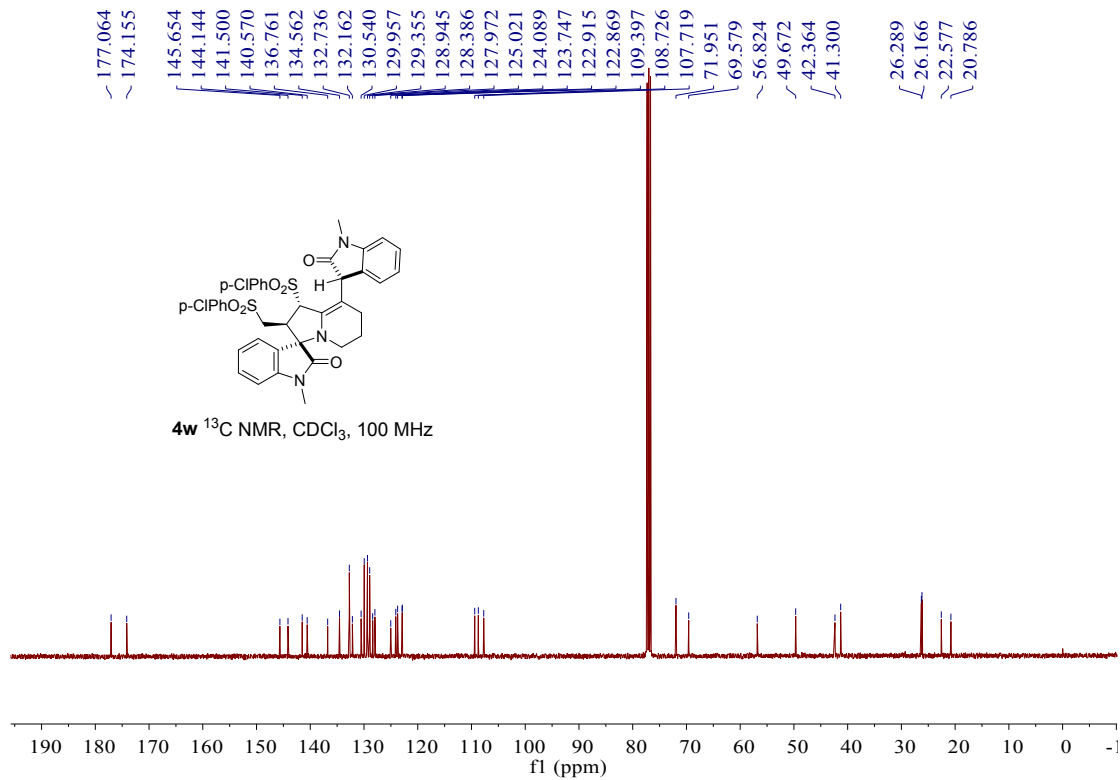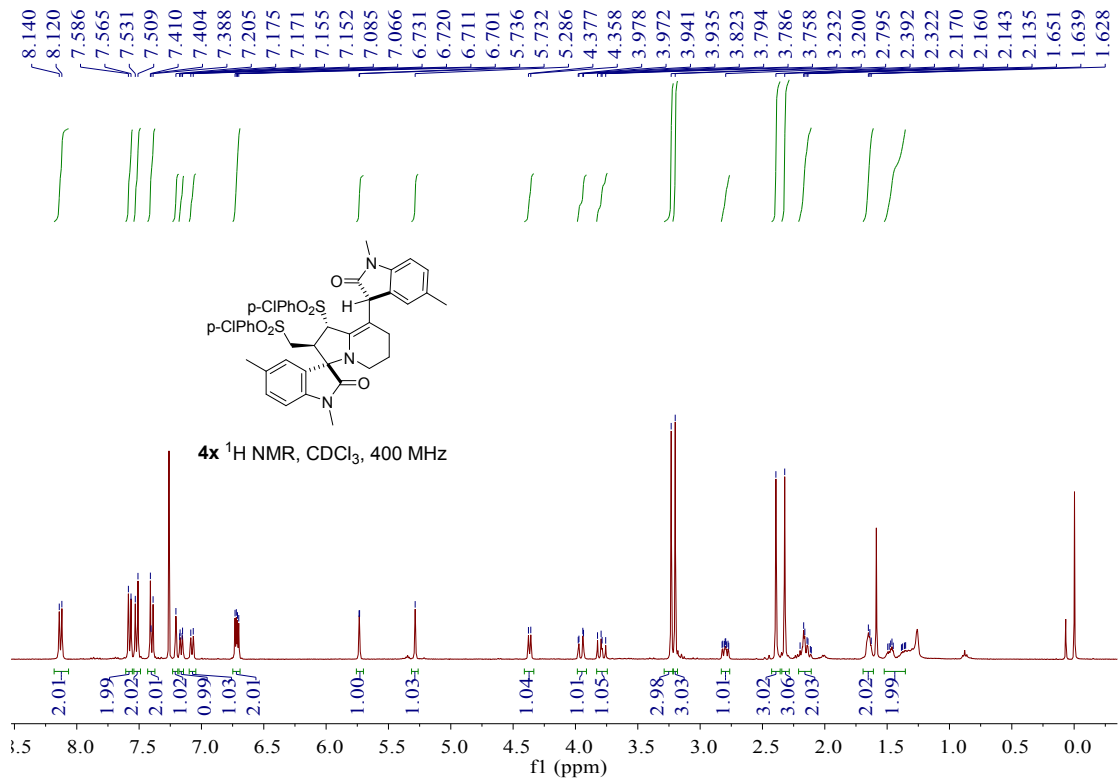

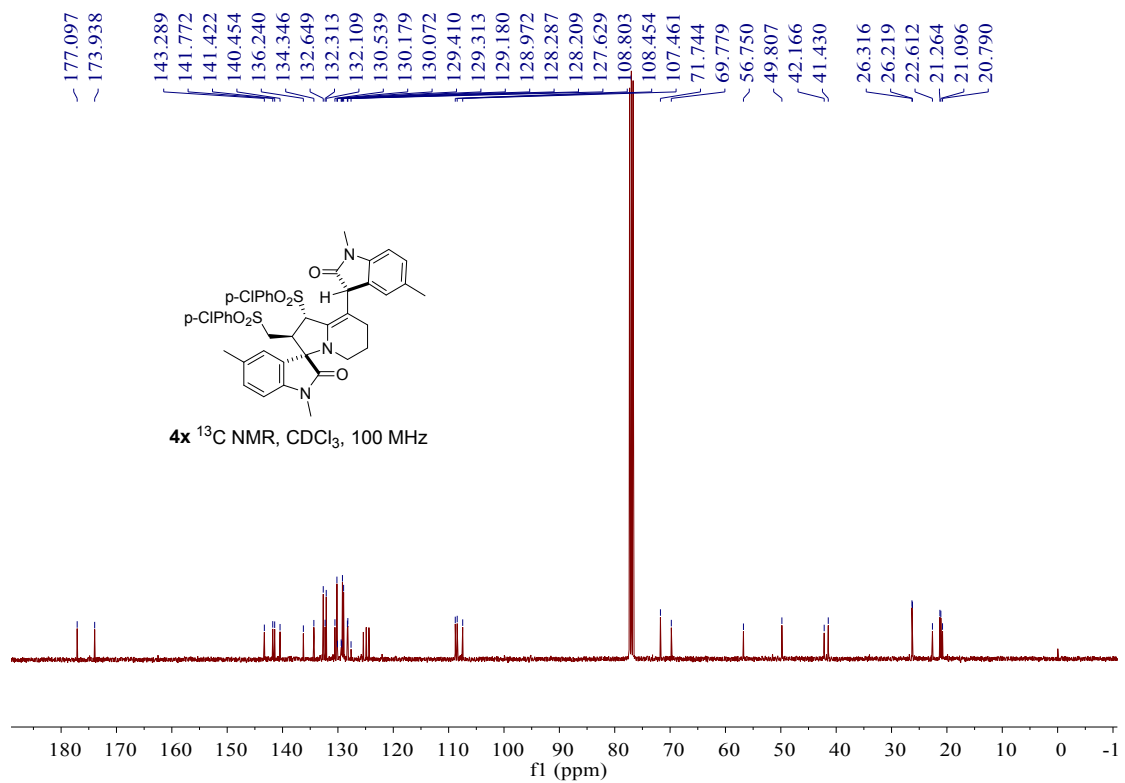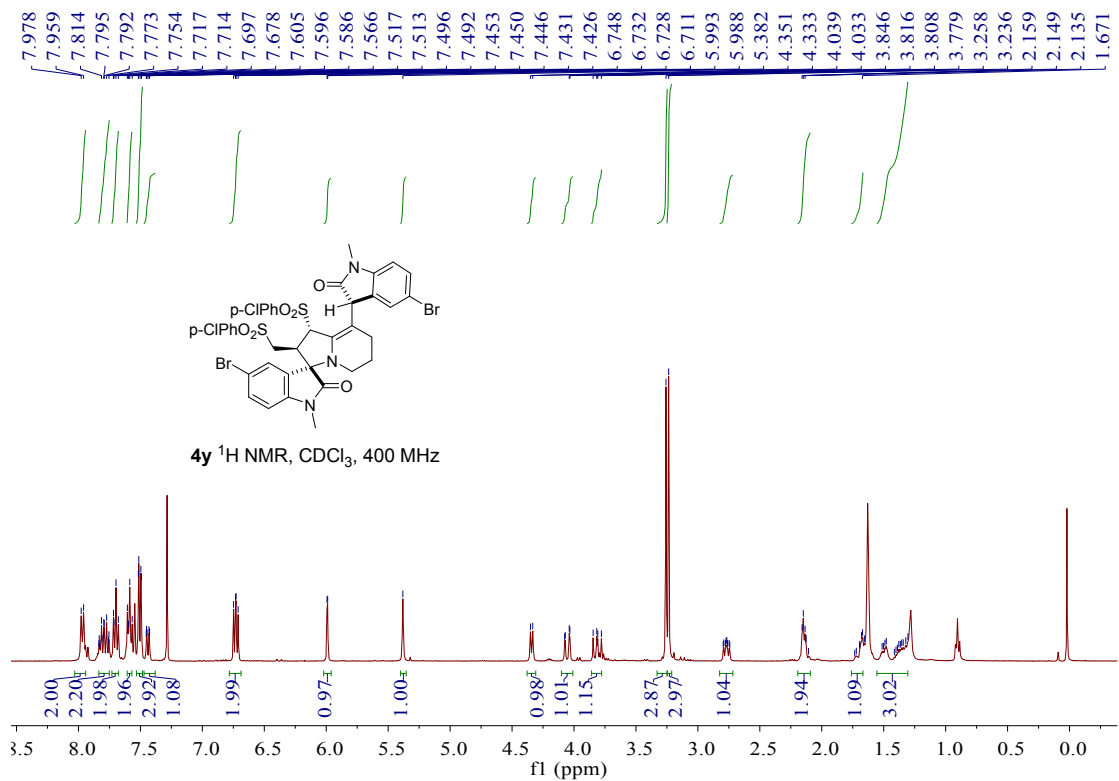

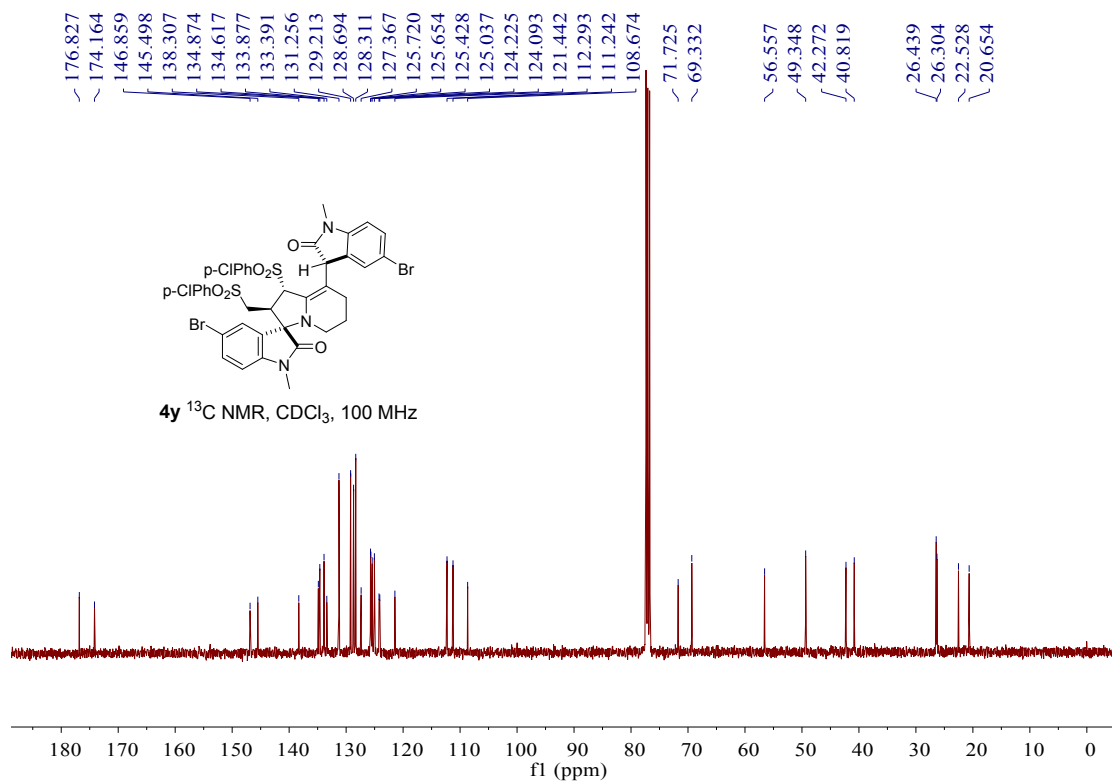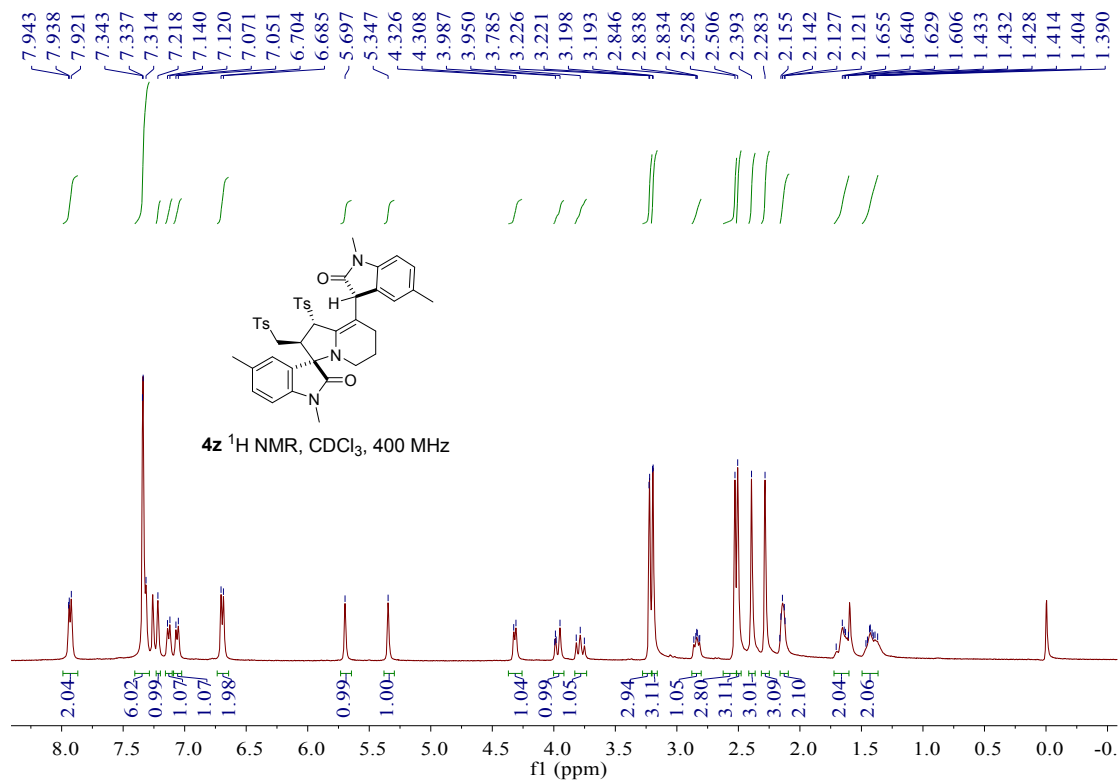



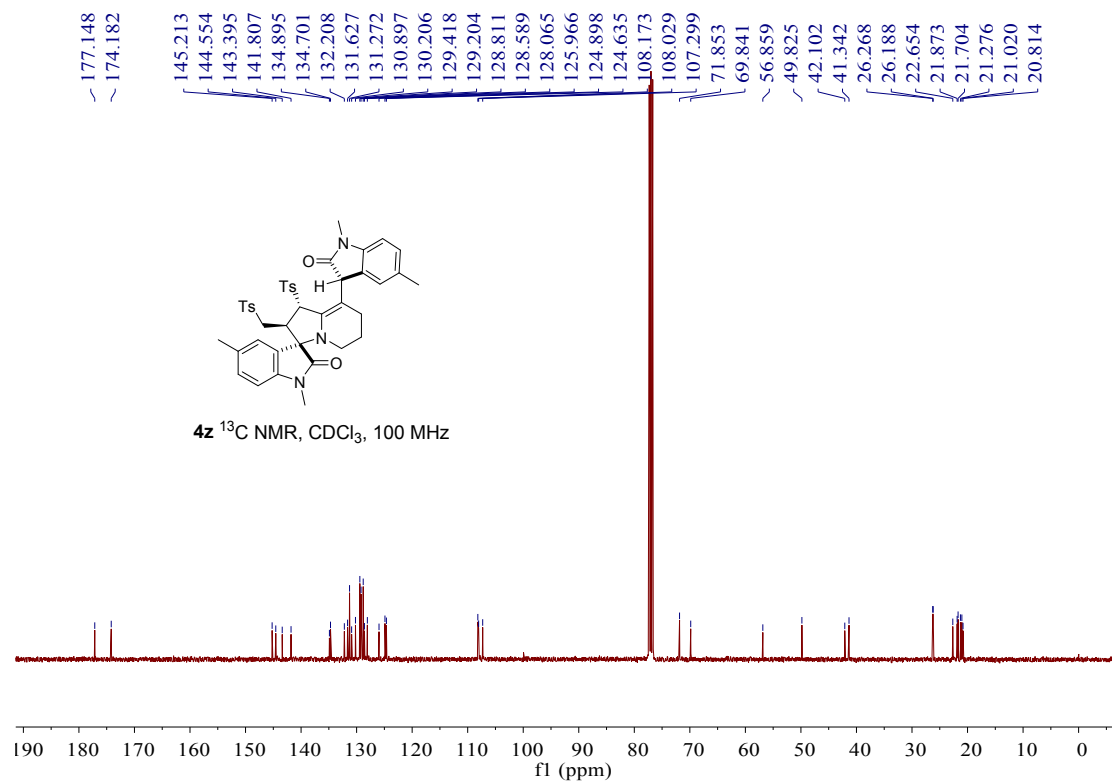

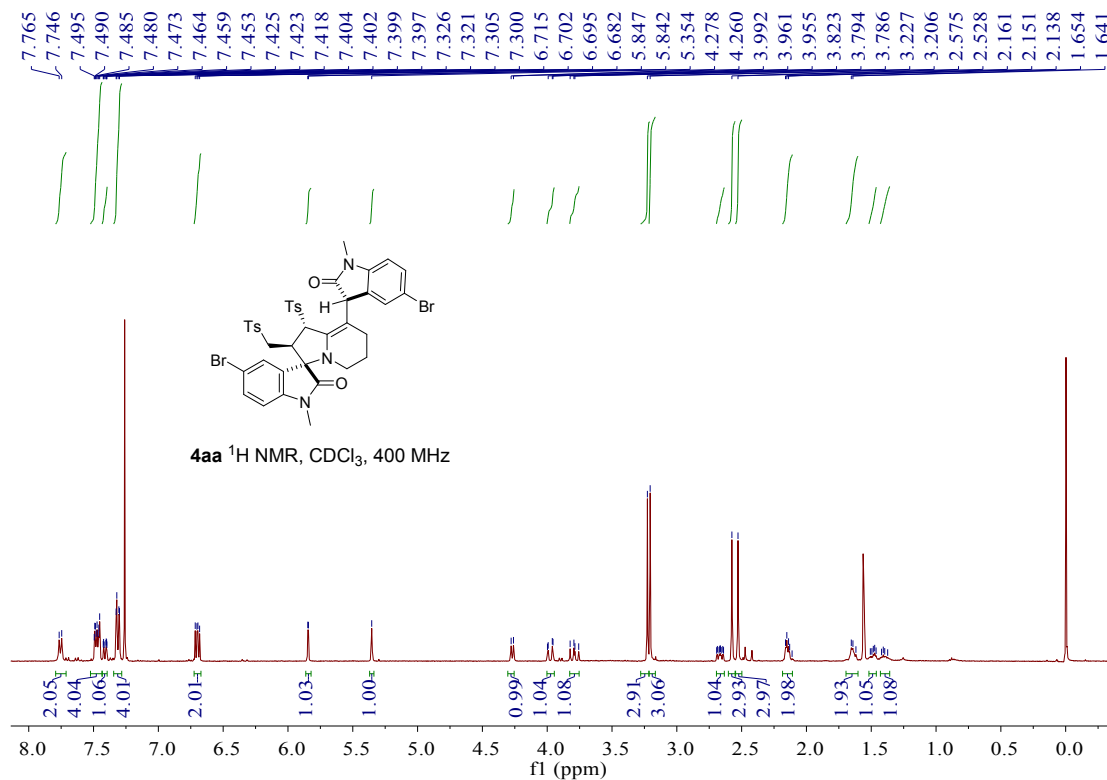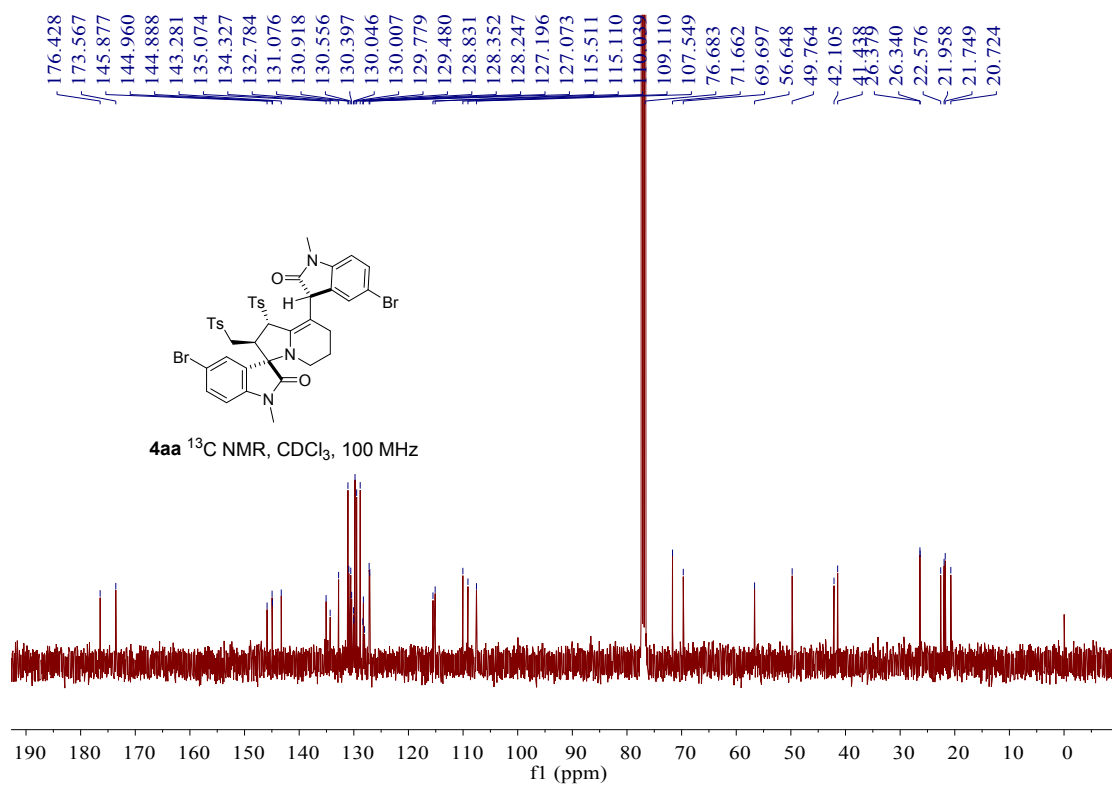

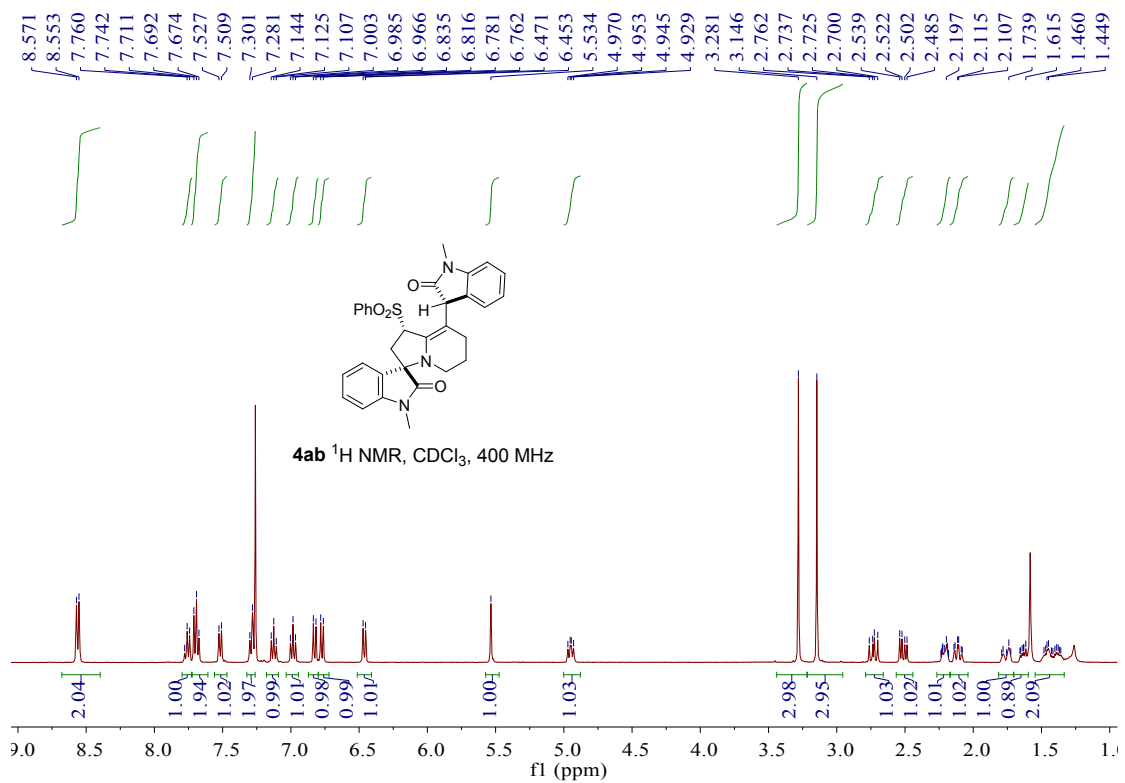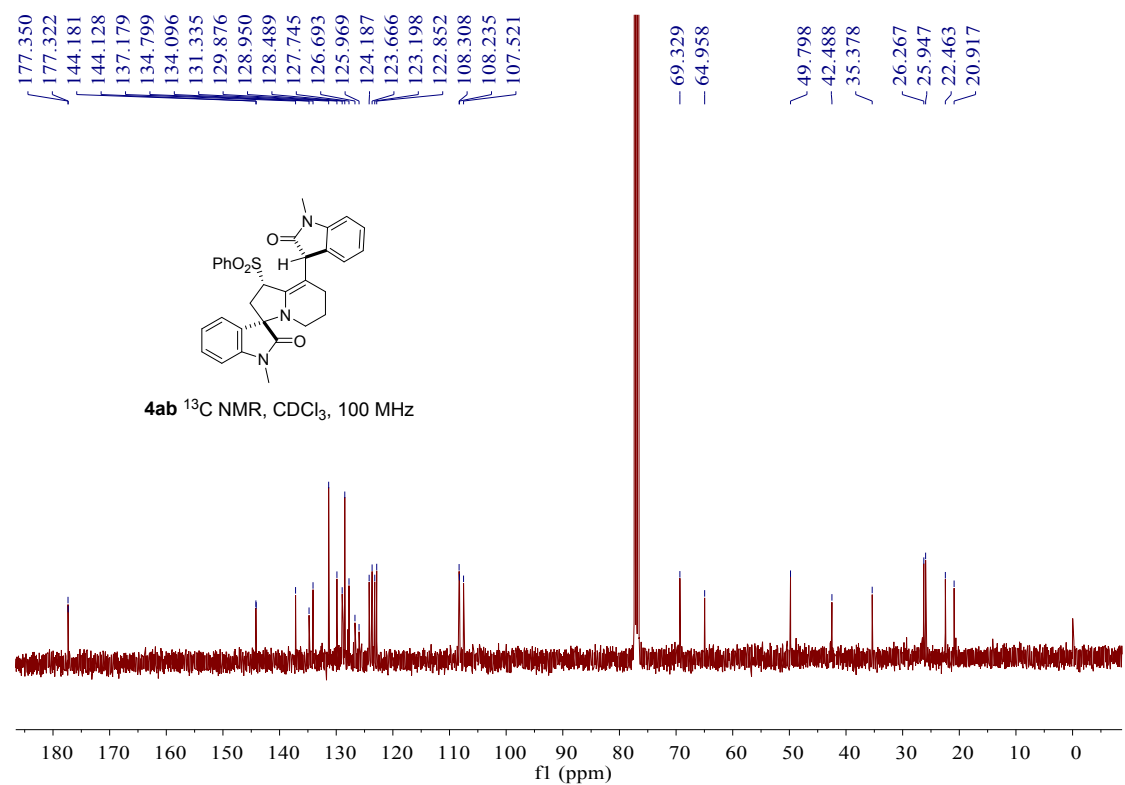

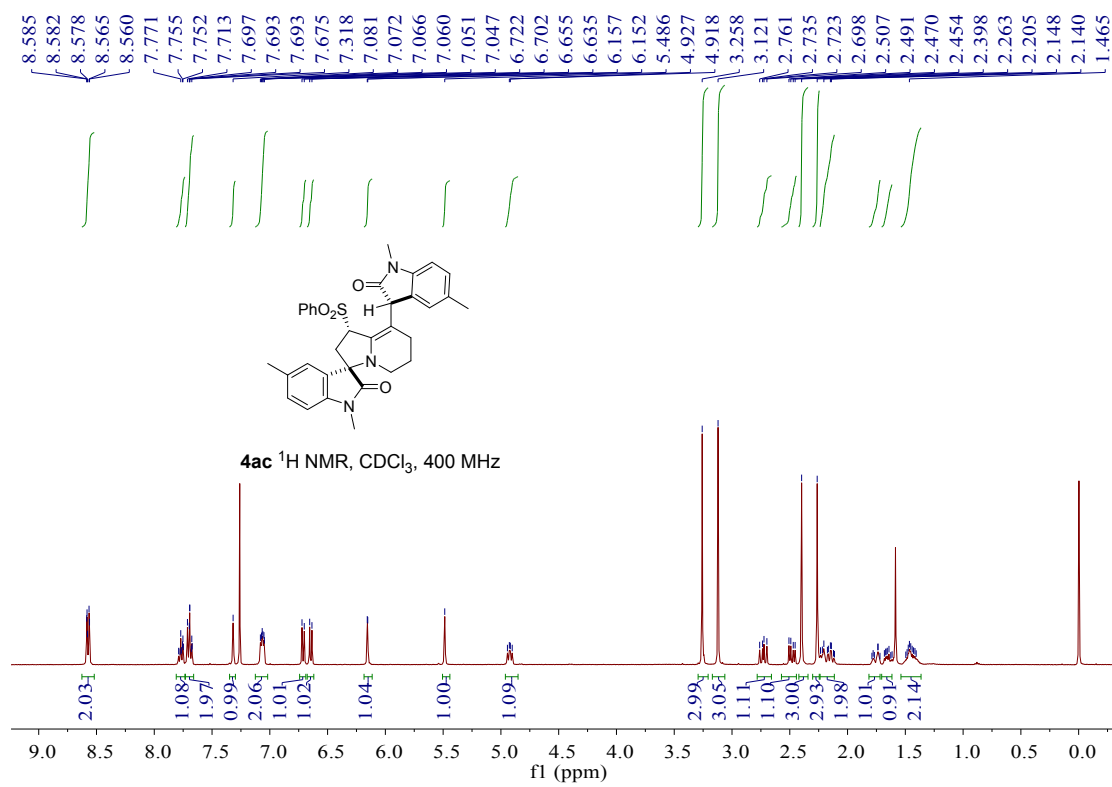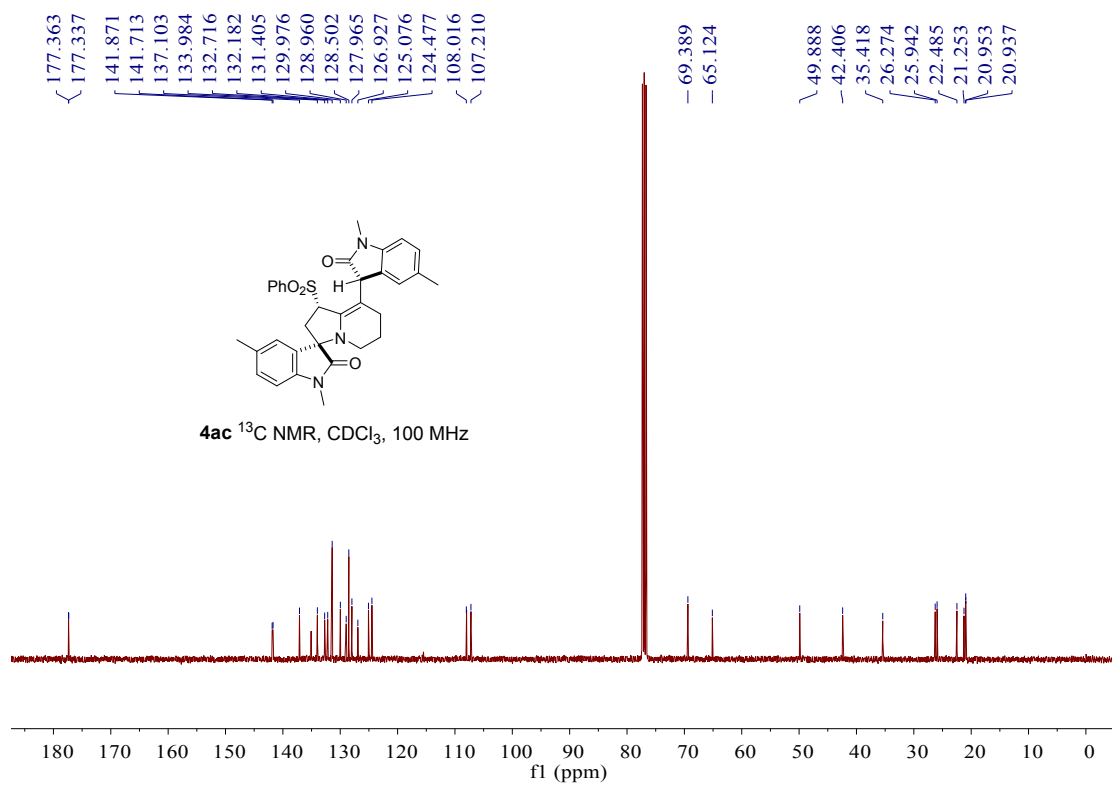

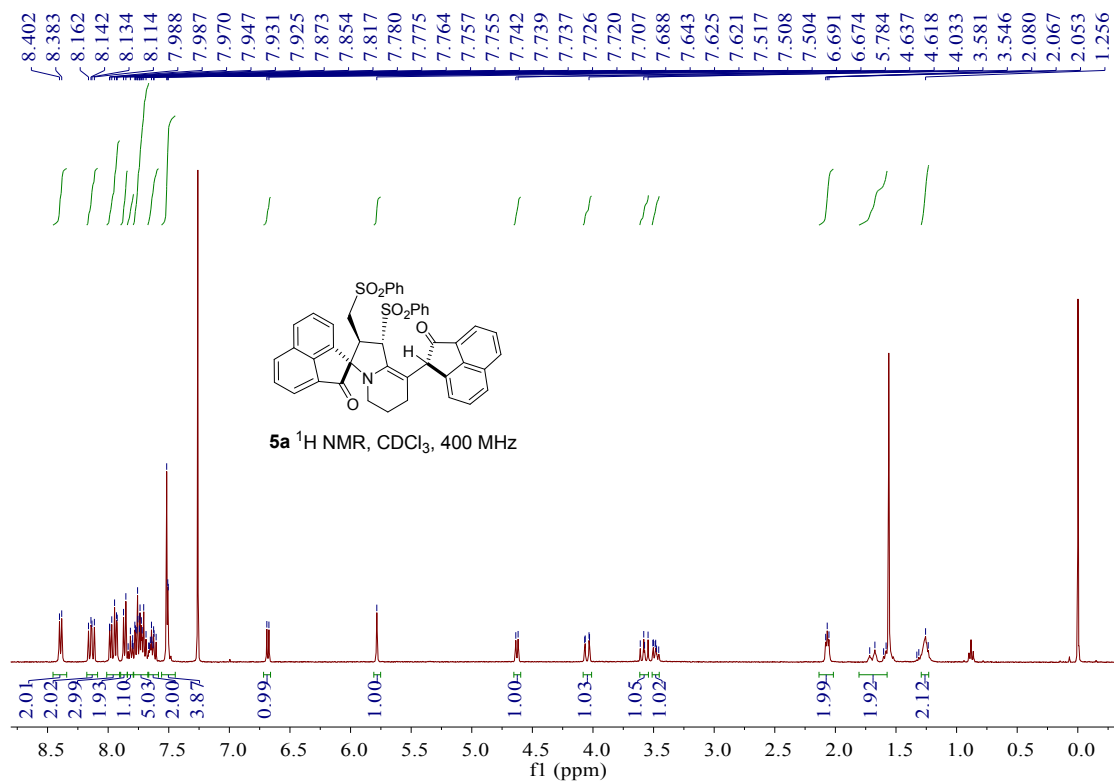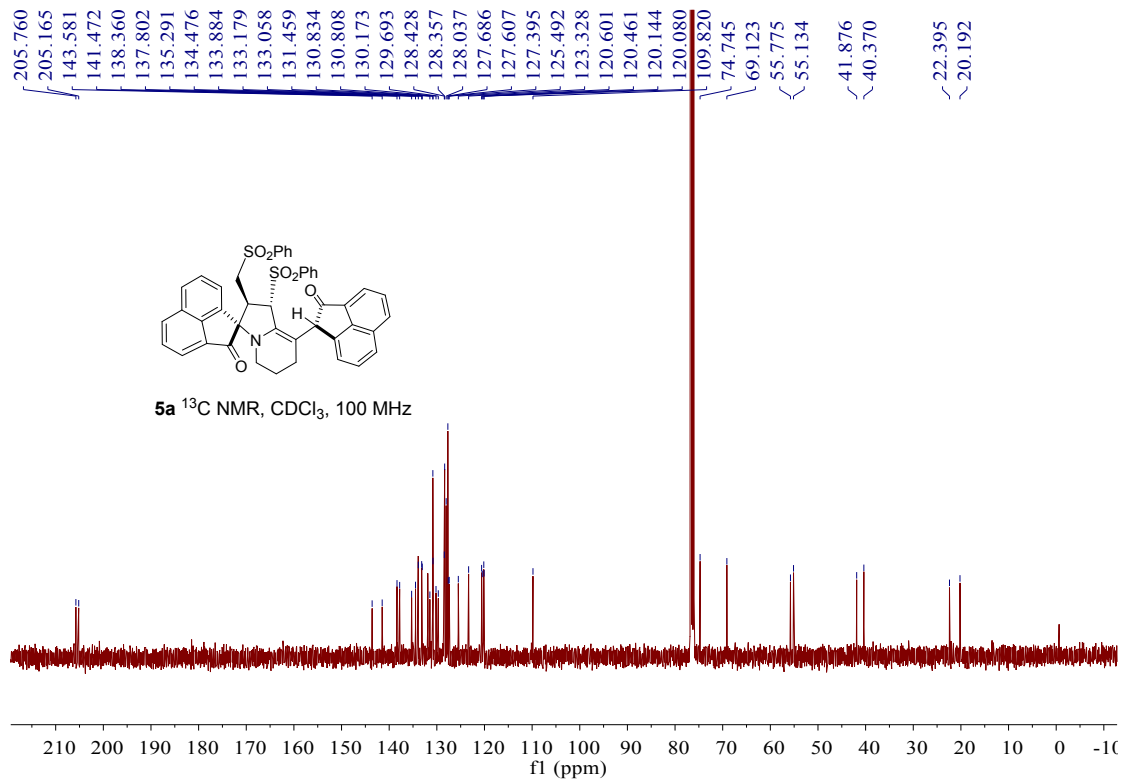

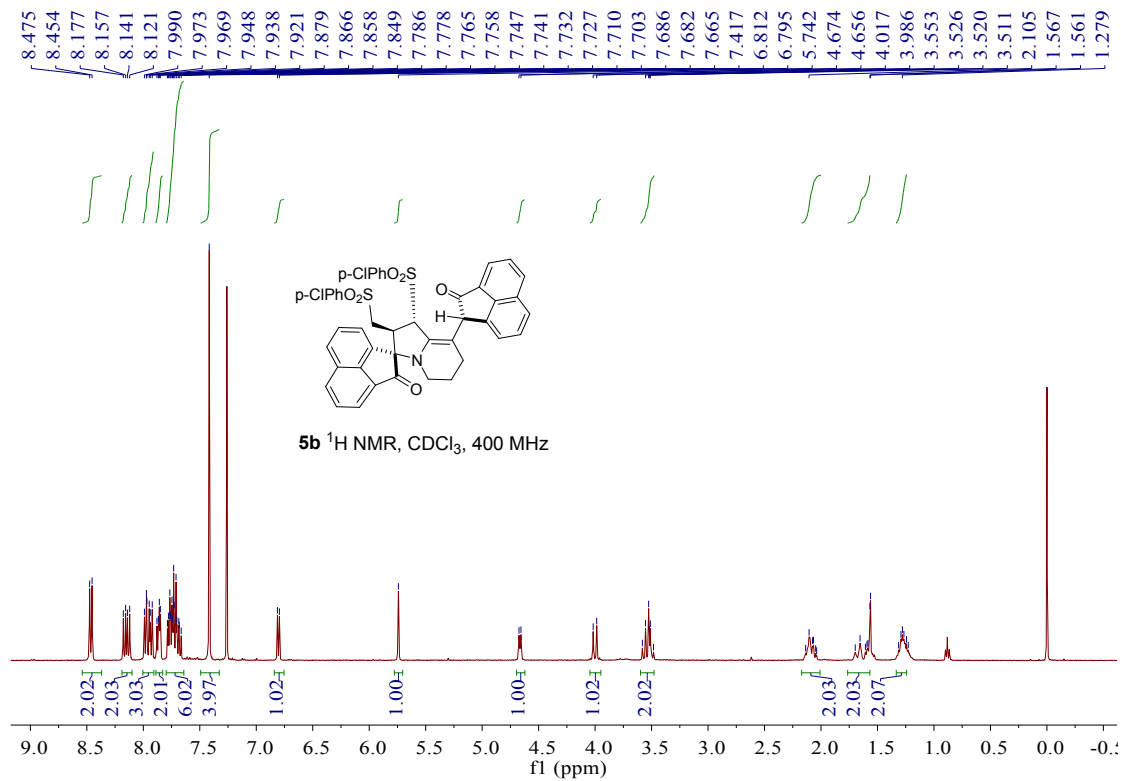

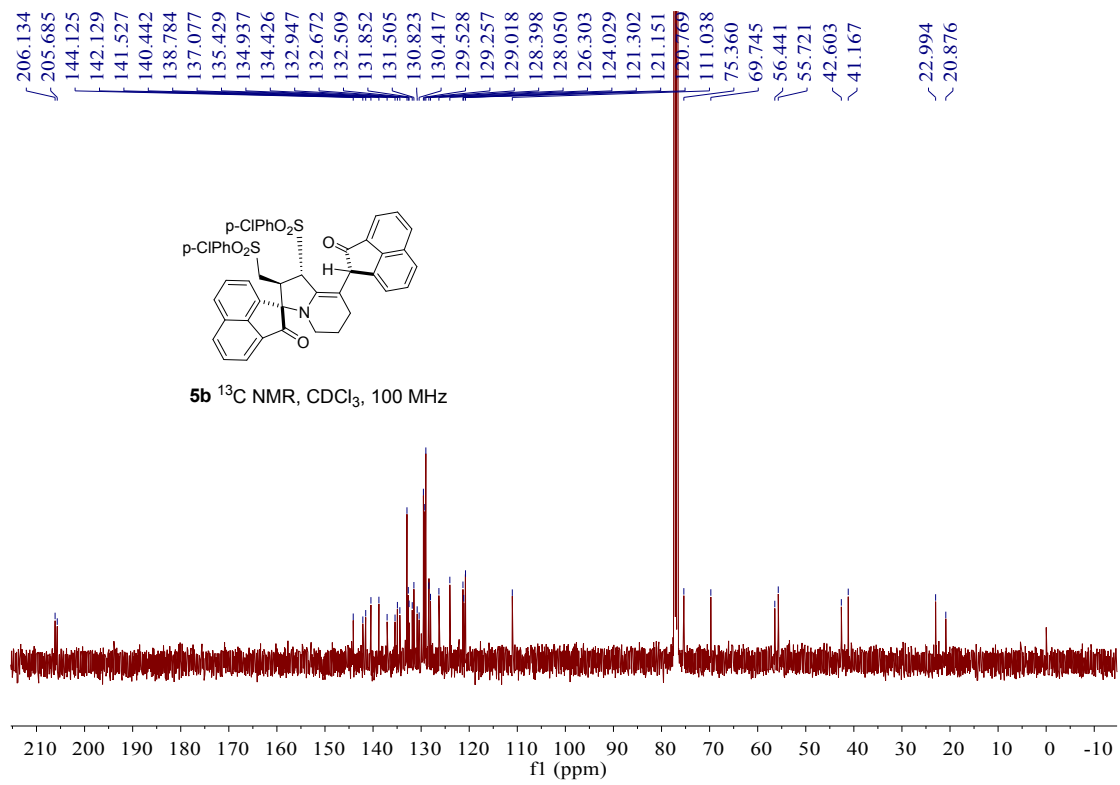

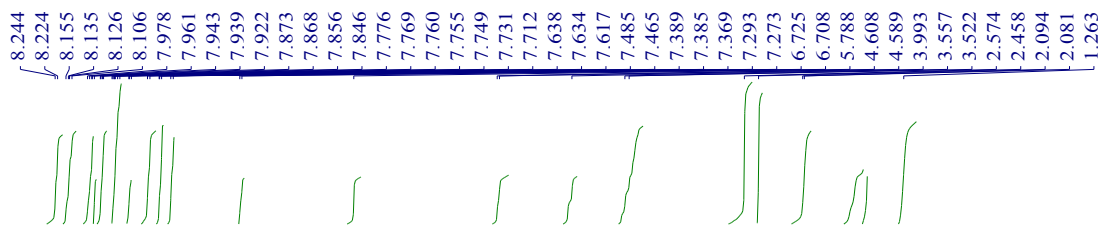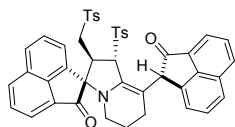

**5c** <sup>1</sup>H NMR, CDCl<sub>3</sub>, 400 MHz

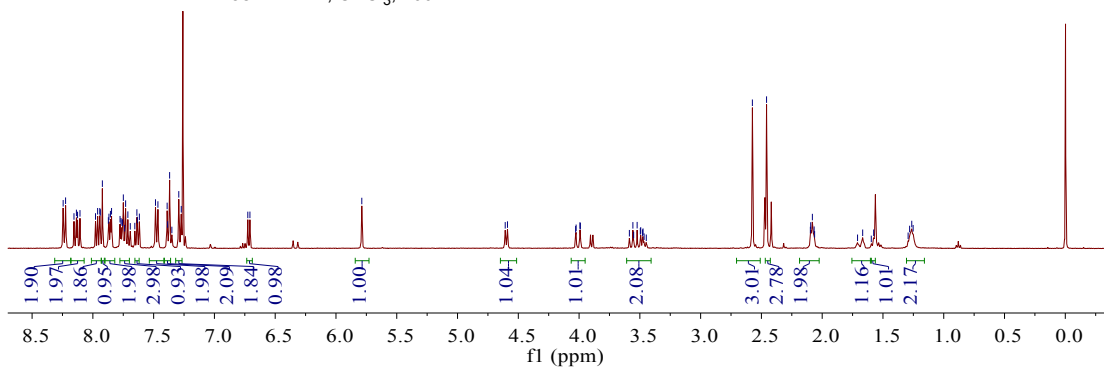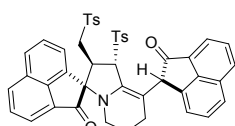

**5c** <sup>13</sup>C NMR, CDCl<sub>3</sub>, 100 MHz

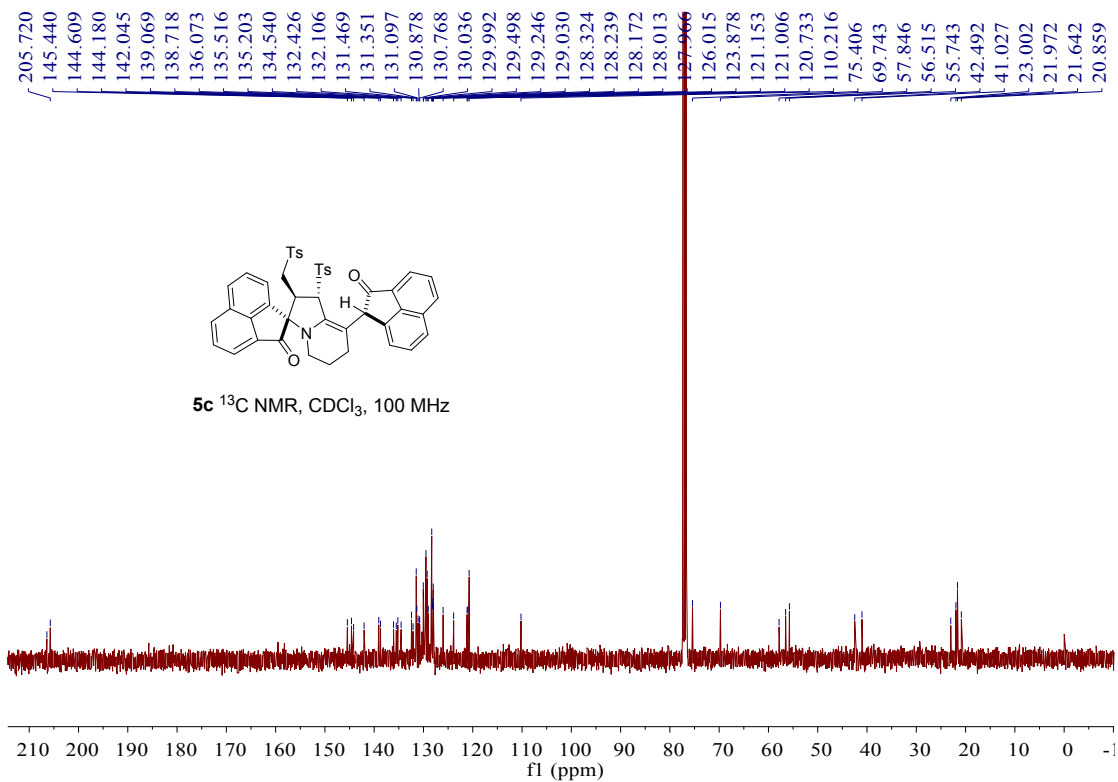



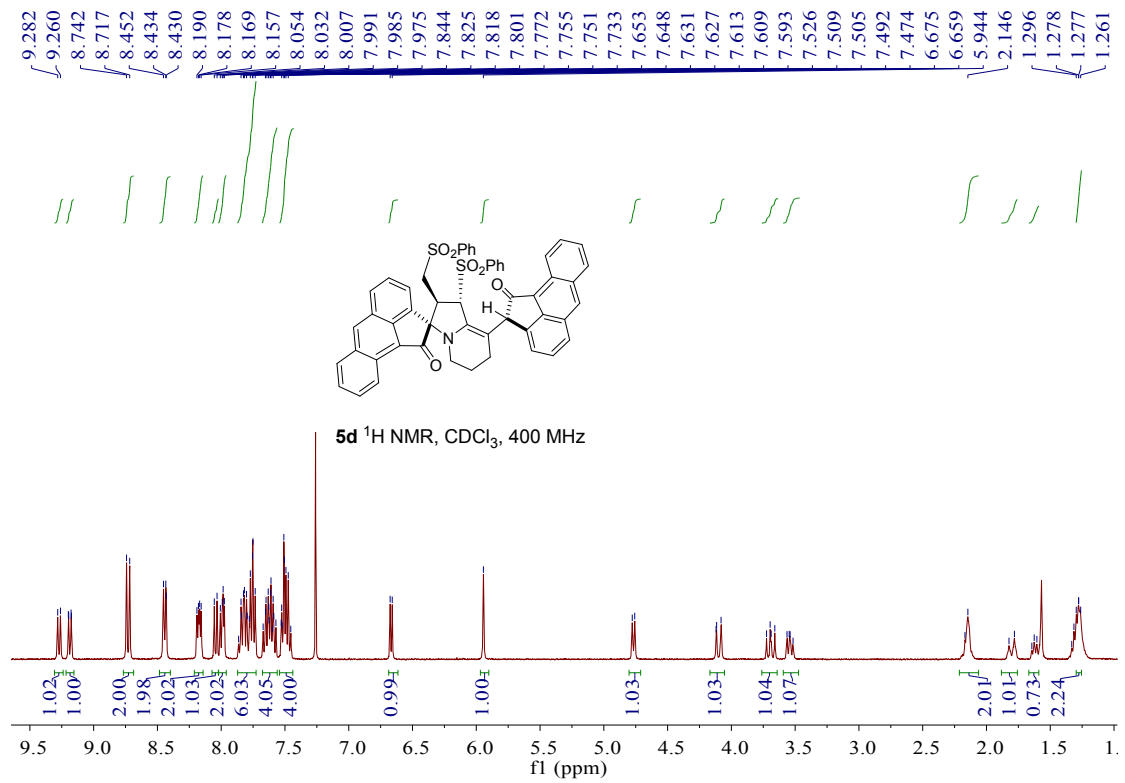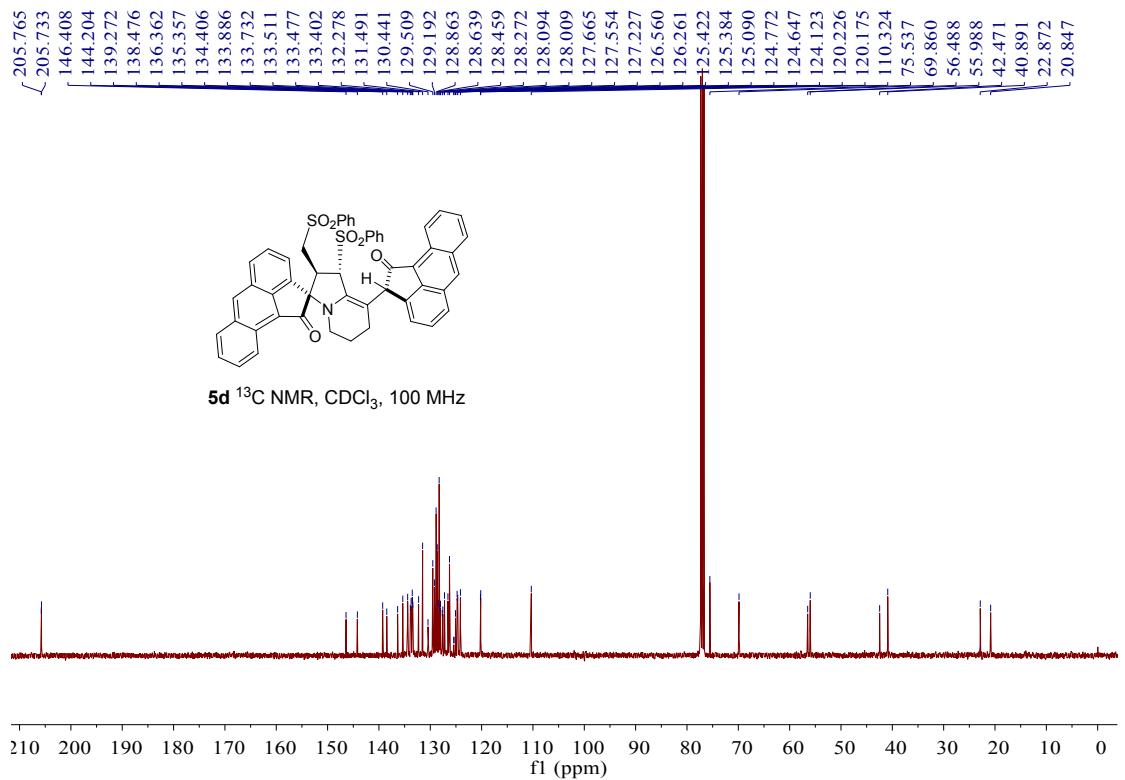

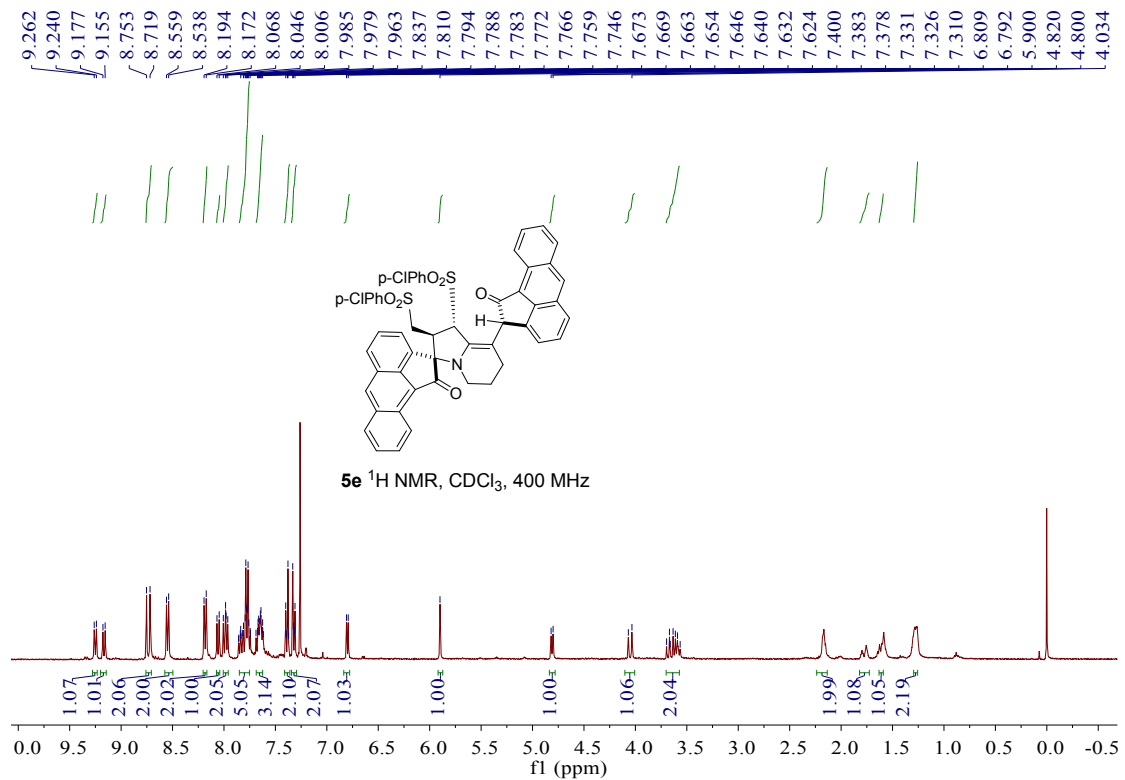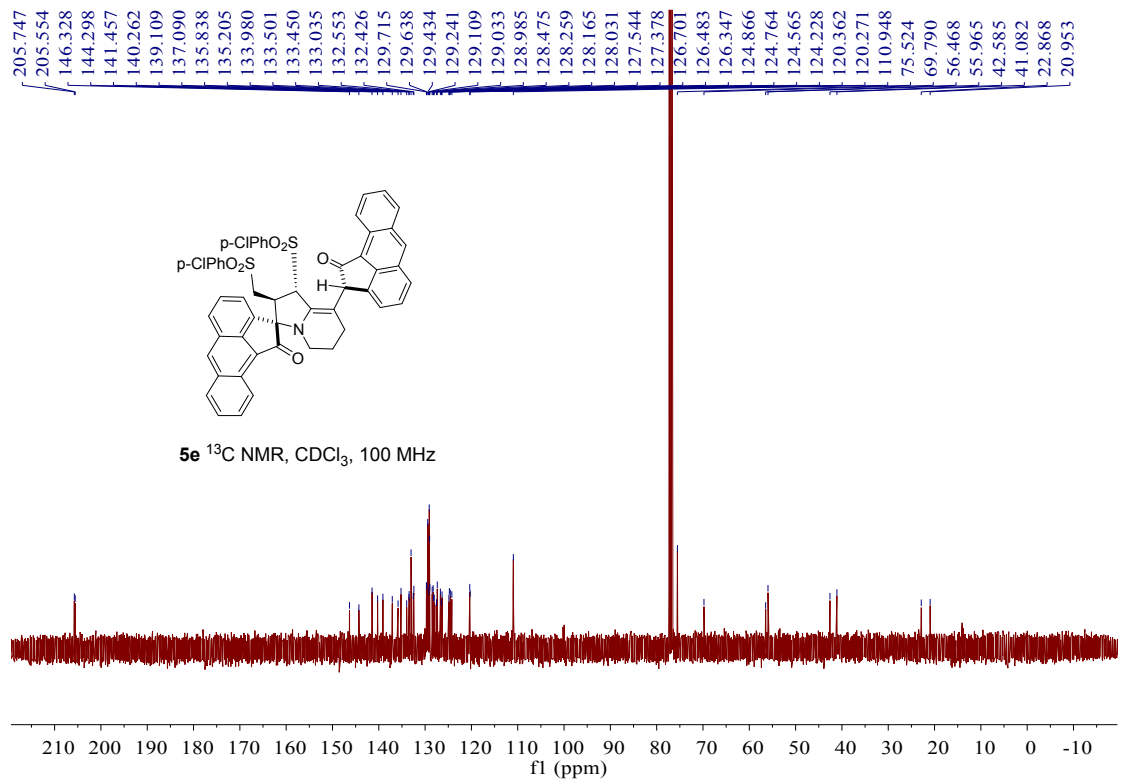

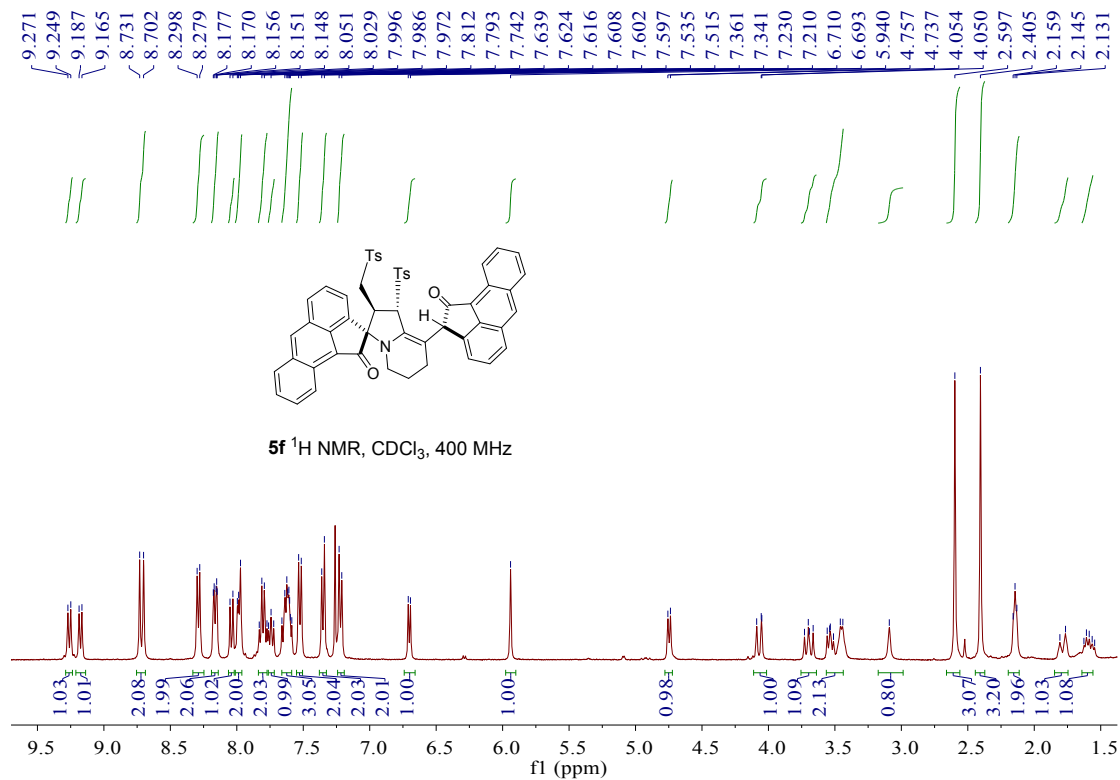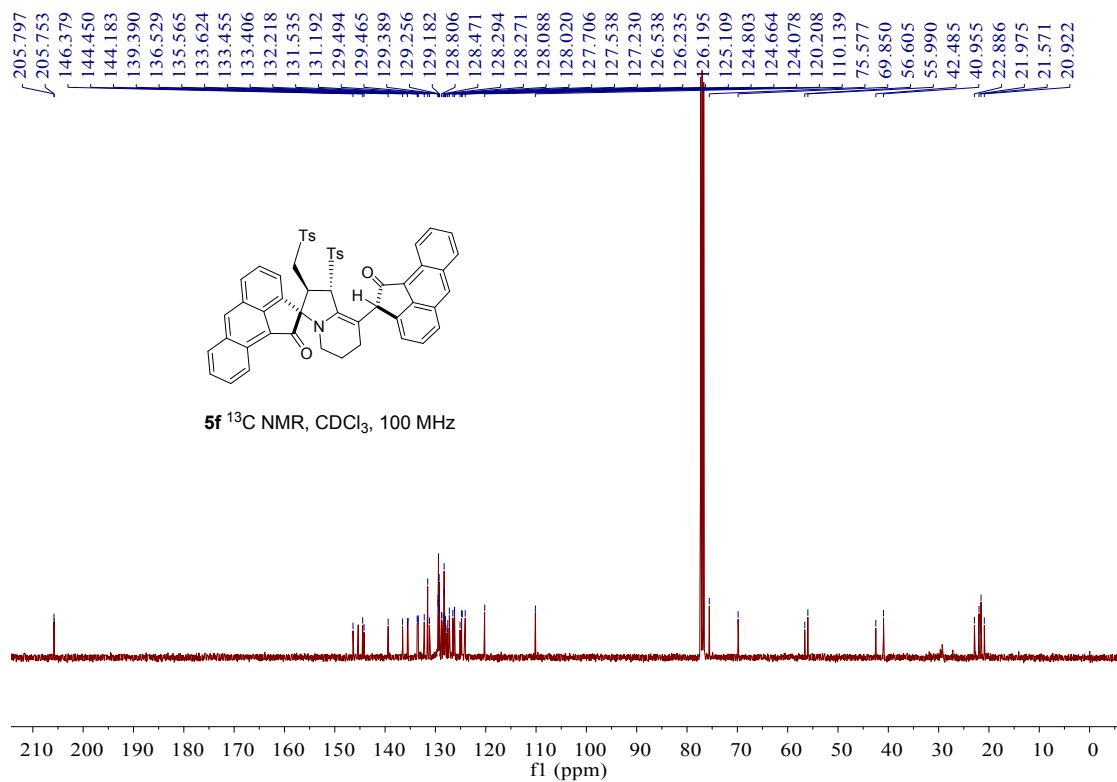

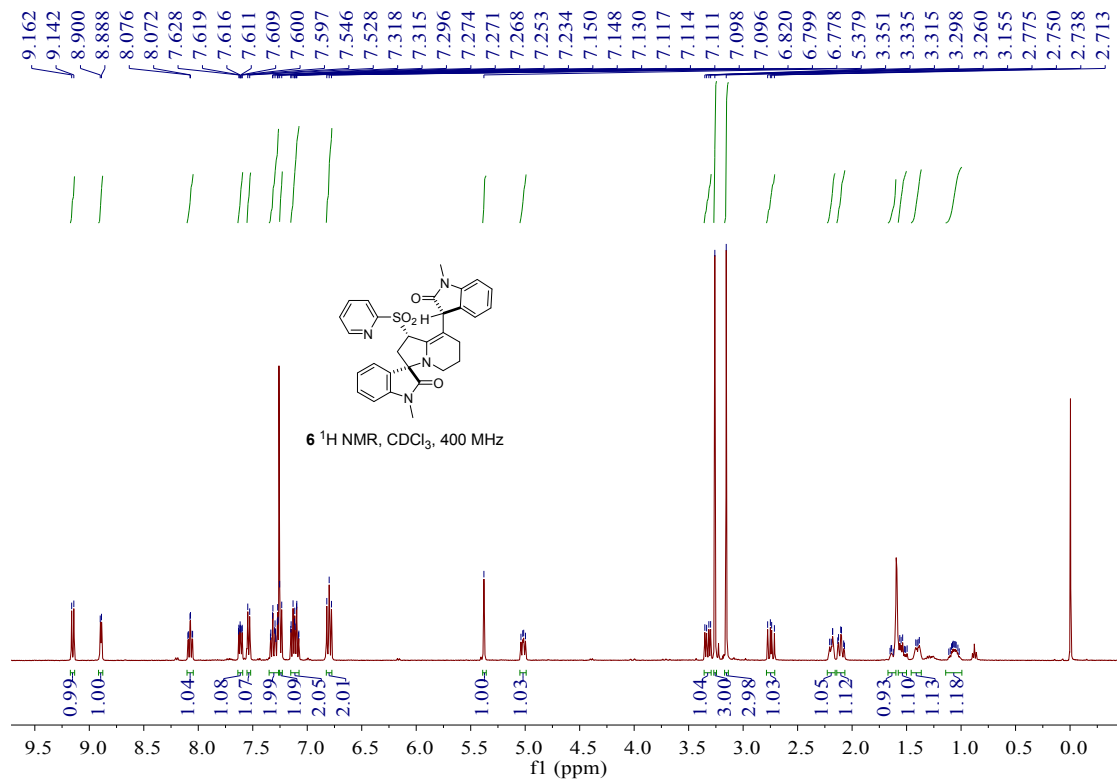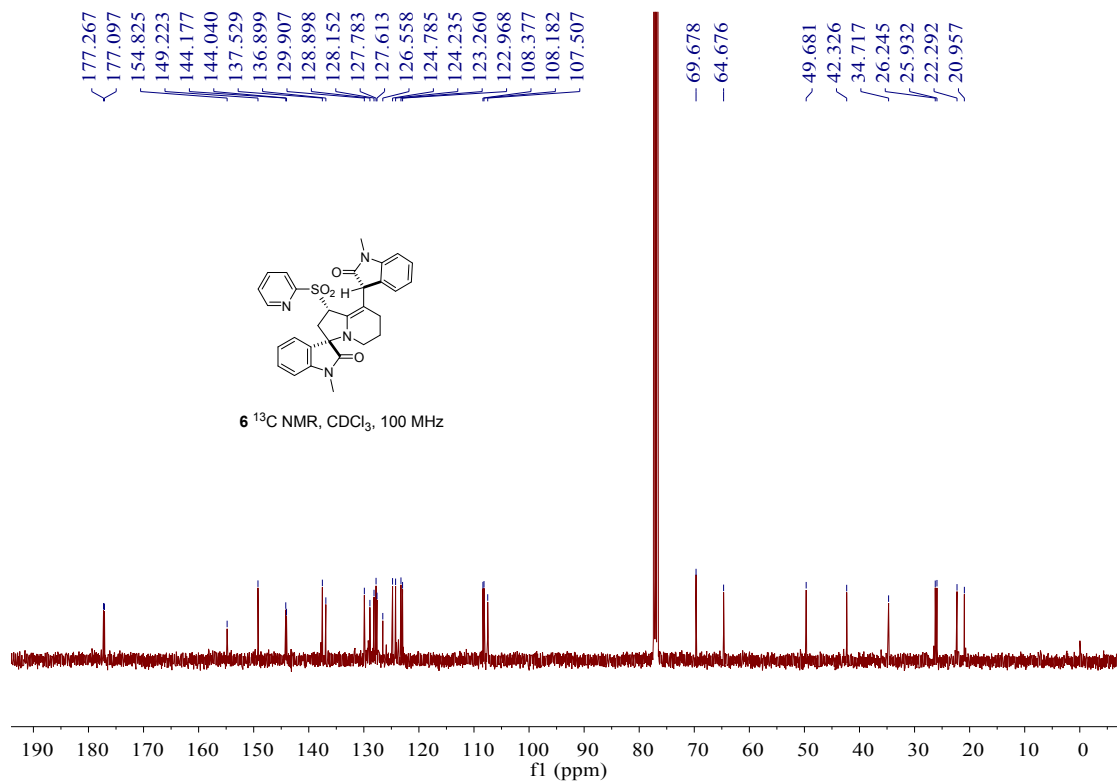

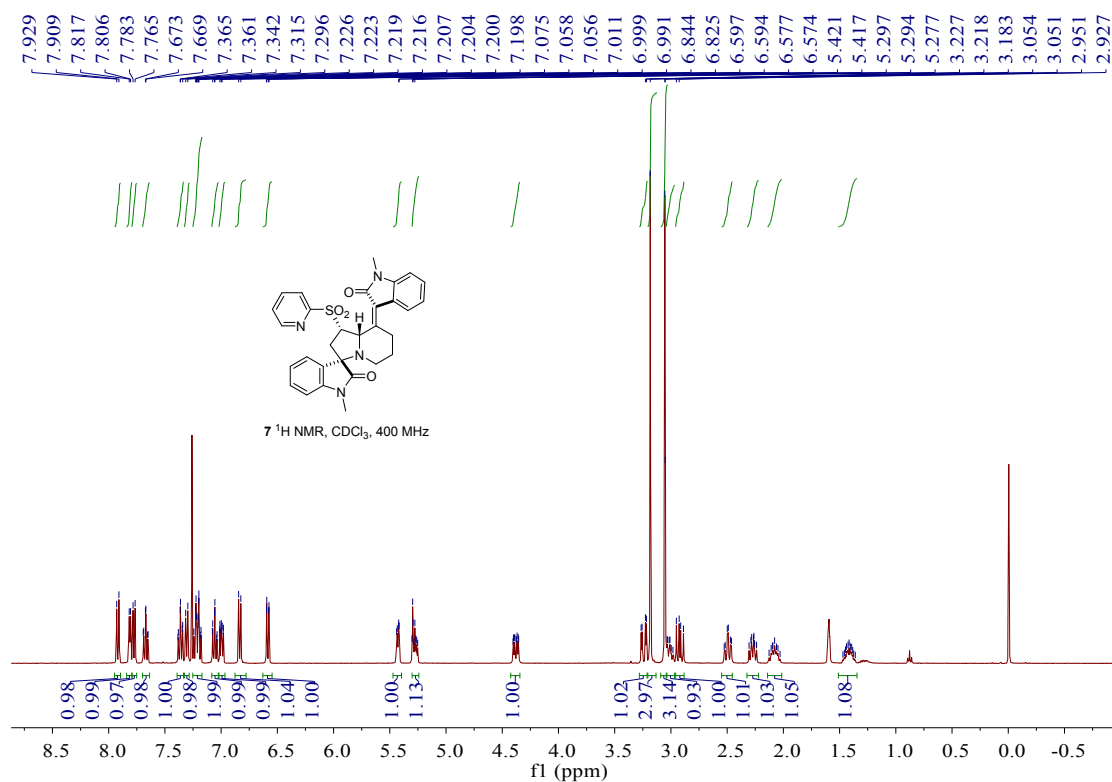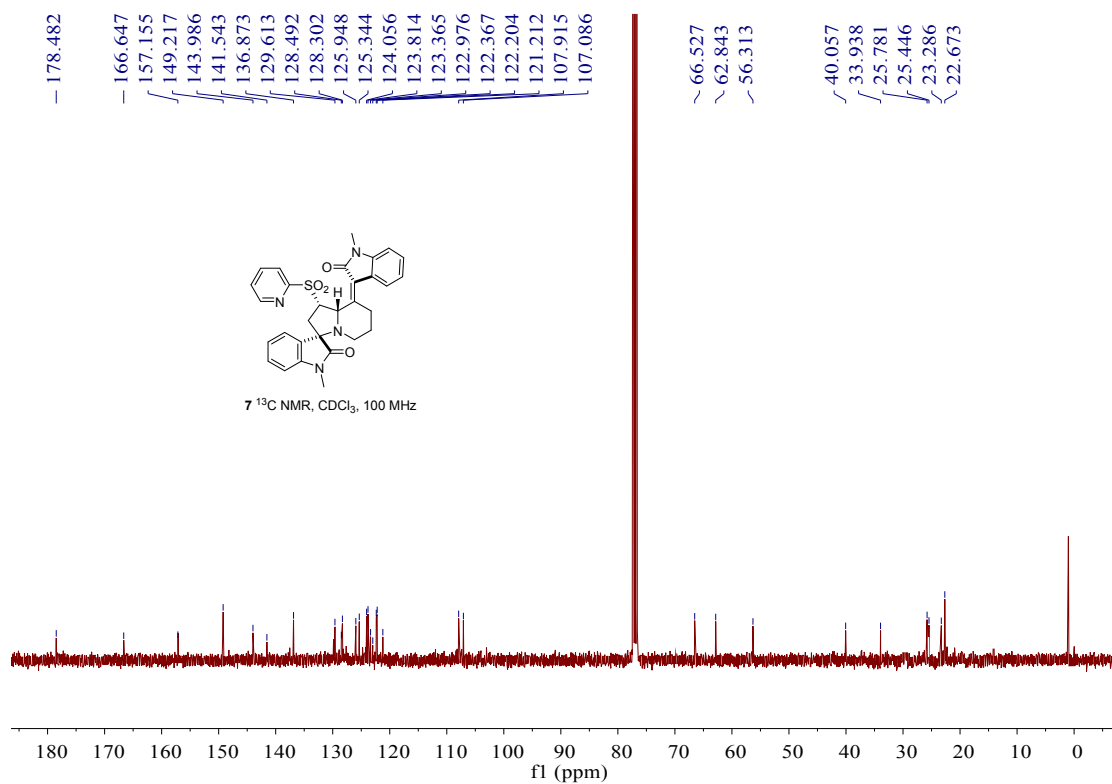

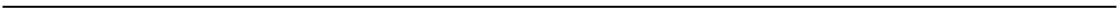

Supplement: c6cc08996h1.pdf [file c6cc08996h1.pdf]
